# Supplementary material for: Contextual and individual inequalities of multimorbidity in Brazilian adults: a cross-sectional national-based study
Source: PubMed Central journal article supplement — BMJ Open. 2017 Jun 9;7(6):e015885. doi: 10.1136/bmjopen-2017-015885 (PMC5726142; doi:10.1136/bmjopen-2017-015885), 2017-06-09
Supplement: bmjopen-2017-015885.draft_revisions.pdf [file bmjopen-2017-015885.draft_revisions.pdf]

# BMJ Open

## Multimorbidity in Brazilian adults: magnitude, patterns, individual and state-level inequalities

|                                    |                                                                                                                                                                                                                                                                                                                                                                                                                                                                                                                                                                                                                                                                                                                                                                                                                                                                                                                                                                                                                                                                                          |
|------------------------------------|------------------------------------------------------------------------------------------------------------------------------------------------------------------------------------------------------------------------------------------------------------------------------------------------------------------------------------------------------------------------------------------------------------------------------------------------------------------------------------------------------------------------------------------------------------------------------------------------------------------------------------------------------------------------------------------------------------------------------------------------------------------------------------------------------------------------------------------------------------------------------------------------------------------------------------------------------------------------------------------------------------------------------------------------------------------------------------------|
| Journal:                           | <i>BMJ Open</i>                                                                                                                                                                                                                                                                                                                                                                                                                                                                                                                                                                                                                                                                                                                                                                                                                                                                                                                                                                                                                                                                          |
| Manuscript ID                      | bmjopen-2017-015885                                                                                                                                                                                                                                                                                                                                                                                                                                                                                                                                                                                                                                                                                                                                                                                                                                                                                                                                                                                                                                                                      |
| Article Type:                      | Research                                                                                                                                                                                                                                                                                                                                                                                                                                                                                                                                                                                                                                                                                                                                                                                                                                                                                                                                                                                                                                                                                 |
| Date Submitted by the Author:      | 06-Jan-2017                                                                                                                                                                                                                                                                                                                                                                                                                                                                                                                                                                                                                                                                                                                                                                                                                                                                                                                                                                                                                                                                              |
| Complete List of Authors:          | Nunes, BP; Universidade Federal de Pelotas, Department of Nursing<br>Chiavegatto Filho, Alexandre; Harvard School of Public Health, Society,<br>Human Development and Health; Faculdade de Saúde Pública da<br>Universidade de São Paulo, Departamento de Epidemiologia<br>Pati, Sanghamitra; Public Health Foundation of India, Indian Institute of<br>Public Health Bhubaneswar; Sanghamitra Pati,<br>Teixeira, Doralice; Secretaria Municipal da Saúde de São Paulo, São Paulo,<br>Brasil<br>Flores, Thaynã; Federal University of Pelotas, Postgraduate Program of<br>Epidemiology<br>Camargo-Figuera, Fabio; Universidad Industrial de Santander, School of<br>Nursing<br>Munhoz, Tiago; Universidade Federal de Pelotas, Postgraduate Programme<br>in Epidemiology<br>Thume, Elaine; Universidade Federal de Pelotas, Department of<br>Nursing/Postgraduate Program of Nursing<br>Facchini, Luiz; Universidad Federal de Pelotas, Departamento de Medicina<br>Social<br>Batista, Sandro Rogerio; Federal University of Goias, Department of<br>Internal Medicine of Medical School |
| <b>Primary Subject<br>Heading</b>: | Epidemiology                                                                                                                                                                                                                                                                                                                                                                                                                                                                                                                                                                                                                                                                                                                                                                                                                                                                                                                                                                                                                                                                             |
| Secondary Subject Heading:         | Public health                                                                                                                                                                                                                                                                                                                                                                                                                                                                                                                                                                                                                                                                                                                                                                                                                                                                                                                                                                                                                                                                            |
| Keywords:                          | Comorbidity, Multimorbidity, Chronic disease, Statistical disease clustering,<br>Multilevel Analysis                                                                                                                                                                                                                                                                                                                                                                                                                                                                                                                                                                                                                                                                                                                                                                                                                                                                                                                                                                                     |
|                                    |                                                                                                                                                                                                                                                                                                                                                                                                                                                                                                                                                                                                                                                                                                                                                                                                                                                                                                                                                                                                                                                                                          |

SCHOLARONE™  
Manuscripts

1  
2  
3  
4 **Title page**

5  
6 **Title:** Multimorbidity in Brazilian adults: magnitude, patterns, individual and state-level  
7  
8 inequalities

9  
10 **Authors:** Bruno P Nunes<sup>1</sup>; Alexandre DP Chiavegatto-Filho<sup>2</sup>; Sanghamitra Pati<sup>3</sup>; Doralice S  
11 Cruz Teixeira<sup>4</sup>; Thaynã R Flores<sup>5</sup>; Fabio A Camargo-Figuera<sup>6</sup>; Tiago N Munhoz<sup>5</sup>; Elaine  
12 Thumé<sup>7</sup>; Luiz A Facchini<sup>5,7</sup>; Sandro R Batista Rodrigues<sup>8</sup>

13  
14  
15  
16 1 – Department of Nursing, Federal University of Pelotas, Brazil

17  
18 2 – Department of Epidemiology, School of Public Health, University of São Paulo,  
19 São Paulo, Brazil

20  
21 3 – Indian Institute of Public, Health, Bhubaneswar, Public Health Foundation of  
22 India, Bhubaneswar, Odisha, India

23  
24 4 – Municipal Health Department of São Paulo, São Paulo, Brasil.

25  
26 5 – Postgraduate Program in Epidemiology, Federal University of Pelotas, Pelotas,  
27 Brazil

28  
29 6 – School of Nursing, Universidad Industrial de Santander, Bucaramanga, Colombia.

30  
31 7 – Postgraduate Program in Nursing, Federal University of Pelotas, Pelotas, Brazil

32  
33 8 – Faculty of Medicine, Federal University of Goiás, Goiânia, Brazil

34  
35  
36  
37  
38  
39  
40  
41  
42 **Correspondence to:** Bruno P Nunes, Department of Nursing, Federal University of Pelotas,  
43  
44 Gomes Carneiro, 1, Phone: +5553 3284-3820, Pelotas-RS, Brazil. Email:  
45  
46 [nunesbp@gmail.com](mailto:nunesbp@gmail.com)

47  
48  
49 **Key-words:** Comorbidity; Multimorbidity; Chronic disease; Statistical disease clustering;  
50  
51  
52 Multilevel Analysis.

53  
54  
55 **Word count:** 2678

1  
2  
3  
4 25 **Abstract**  
5  
6

7 26 **Objectives:** Multimorbidity is a public health problem worldwide. In Low and Middle  
8  
9 27 Income Countries (LMIC), such as Brazil, the problem is made worse by greater individual  
10  
11 28 and contextual inequalities. However, little information is available about the topic.  
12  
13

14 29 **Methods:** A national-based cross-sectional study was carried out in 2013 with Brazilian  
15  
16 30 adults. Multimorbidity was evaluated by a list of 22 physical and mental morbidities (based  
17  
18 31 on self-reported medical diagnosis and Patient Health Questionnaire 9 for depression). The  
19  
20 32 outcome was analyzed taking  $\geq 2$  and  $\geq 3$  diseases as cut-off points. Factor analysis (FA) was  
21  
22 33 used to identify disease patterns and multilevel models were used to test association with  
23  
24 34 individual and contextual variables.  
25  
26  
27

28 35 **Results:** The sample was comprised of 60,202 individuals. Multimorbidity frequency was  
29  
30 36 22.2% (CI95% 21.5; 22.9) for  $\geq 2$  morbidities and 10.2% (CI95% 9.7; 10.7) for  $\geq 3$   
31  
32 37 morbidities. In the multilevel adjusted models, females, older people, those living with a  
33  
34 38 partner and having less schooling presented more multiple diseases. No linear association was  
35  
36 39 found according to asset ownership but greater outcome frequency was found in individuals  
37  
38 40 with mid-range asset ownership quintiles. Living in states with higher levels of education and  
39  
40 41 wealthier states was associated with greater multimorbidity. Two patterns of morbidities  
41  
42 42 (cardiometabolic problems and Respiratory/mental/muscle-skeletal disorders) explained 92%  
43  
44 43 of total variance. The relationship of disease patterns with individual and contextual variables  
45  
46 44 was similar to the multimorbidity cut-off associations.  
47  
48  
49  
50

51 45 **Conclusions:** In Brazil, at least 19 million adults had multimorbidity. Frequency is similar to  
52  
53 46 that found in other LMIC. Contextual and individual social inequalities were observed.  
54  
55  
56  
57  
58  
59  
60

1  
2  
3  
4 47 **Strengths and limitations of this study**  
5  
6

- 7 48 • Comprehensive information about multimorbidity is still scarce in Low and Middle  
8  
9 49 Income countries, especially in Brazil  
10  
11 50 • As far as we are aware, this is among the first information about multimorbidity  
12  
13 51 occurrence, patterns, individual and contextual factors in a sample representative of  
14  
15 52 the whole of Brazil  
16  
17 53 • Multimorbidity is a challenge to the Brazilian health system due to its high frequency  
18  
19 54 (two in every ten adults had  $\geq 2$  diseases and one in every ten had  $\geq 3$  diseases,  
20  
21 55 representing at least 19 million Brazilians) and the interplay of individual and  
22  
23 56 contextual characteristics associated with the problem.  
24  
25 57 • Except for depression, other morbidities were evaluated by self-reporting and we are  
26  
27 58 not able to evaluate the contextual determinants at neighborhood level  
28  
29  
30  
31  
32  
33  
34  
35  
36  
37  
38  
39  
40  
41  
42  
43  
44  
45  
46  
47  
48  
49  
50  
51  
52  
53  
54  
55  
56  
57  
58  
59  
60

## 59 **Introduction**

60 Multimorbidity is a current and worldwide public health problem mainly due to its high  
61 frequency (>60% in adults) and its association with negative outcomes [1-4]. Most evidence  
62 is from High Income Countries [4] but results from Low and Middle Income Countries  
63 (LMIC) are also available and increasing in the literature [5-8], including epidemiological  
64 information about multimorbidity in Brazilian cities [9-11].

65 Similar to international evidence, multimorbidity in Brazil is greater in females and increases  
66 according to age. Socioeconomic inequalities are also observed mainly related to educational  
67 differences whereas multiple disease is more frequent in adults with less schooling and the  
68 elderly[10, 11].

69 However, as far as we are aware, Brazilian evidence on multimorbidity for the entire country  
70 is not available. Brazil is the 5<sup>th</sup> most populous country in the world with more than 200  
71 million people. Furthermore, it is marked by historic social inequalities in different health  
72 aspects comprising the occurrence of chronic diseases including both physical and mental  
73 disorders [12-14]. Understanding the occurrence and patterns of multimorbidity in the whole  
74 country can be relevant for Brazilian Unified Health System management of the challenges  
75 resulting from the rapid demographic and epidemiological transitions that have occurred in  
76 recent years. Additionally, identifying and comprehending the contextual and individual  
77 differences surrounding multimorbidity occurrence helps policy-makers to prioritize and  
78 promote health actions and interventions related to multimorbidity management.

79 Thus, the aim of this study was to evaluate the frequency and patterns of multimorbidity in  
80 Brazilian adults, as well to measure their association with individual and contextual factors.

1  
2  
3  
4 81 **Methods**  
5  
6

7 82 This was a cross-sectional study using population-based data from the Brazilian National  
8  
9 83 Health Survey (*Pesquisa Nacional de Saúde - PNS*) carried out in Brazil in 2013. The survey  
10  
11 84 was conducted by *Instituto Brasileiro de Geografia e Estatística (IBGE)* and the Ministry of  
12  
13 85 Health. The sample is representative of people living in permanent housing, located in urban  
14  
15 86 or rural areas, covering the country's five major geographical regions, its 26 states and  
16  
17 87 Federal District.

18  
19  
20  
21 88 Sampling was done in three stages, the first being the selection of census tracts, followed by  
22  
23 89 households and, finally, individuals aged 18 or over. More details about the sampling process  
24  
25 90 can be found elsewhere[15, 16].  
26  
27

28  
29 91 Multimorbidity was evaluated by using a list of all 22 self-reported morbidities available in  
30  
31 92 the study, 21 of which were based on self-reported medical diagnosis, while depression was  
32  
33 93 based on the Patient Health Questionnaire-9(PHQ-9)[17]. The question applied to measure  
34  
35 94 each disease based on self-reported medical diagnosis was: "*Has any physician already*  
36  
37 95 *diagnosed you as having [each disease]?*". The following morbidities were included: High  
38  
39 96 Blood Pressure - HBP; Spinal column problem; Hypercholesterolemia; Depression; Diabetes;  
40  
41 97 Arthritis/rheumatism; Asthma/wheezy bronchitis; Work-related muscle-skeletal disorders;  
42  
43 98 Cancer; Other heart disease; Stroke; Kidney problem; Heart attack; Heart failure; Bronchitis;  
44  
45 99 Angina; Emphysema; Other lung disease; Bipolar disorder; Other mental disease;  
46  
47  
48  
49 100 Schizophrenia; and Obsessive Compulsive Disorder (OCD). Multimorbidity was evaluated by  
50  
51 101 two cut-off points as per the literature[4, 18]:  $\geq 2$  and  $\geq 3$  morbidities. Women who had HBP or  
52  
53 102 diabetes only during pregnancy were considered as not having these diseases.  
54  
55  
56  
57  
58  
59  
60

1  
2  
3  
4 103 Independent variables were sex (male; female), age (continuous), Skin color (white; black;  
5  
6 104 and brown - Asian-Brazilian and indigenous were not shown because they represented less  
7  
8 105 than 1.6% of the sample), marital status (without partner; with partner), schooling in years (0:  
9  
10 106 No schooling; 1-8: incomplete primary school; 8-11: complete primary school and incomplete  
11  
12 107 secondary school; ≥12: complete secondary school up to complete higher education), asset  
13  
14 108 ownership in quintiles (based on ownership of bathroom, car, motorcycle, refrigerator,  
15  
16 109 washing machine, DVD player, TV, landline telephone, microcomputer and microwave  
17  
18 110 oven), private health plan (no; yes), geographical area (urban; rural); state-level education in  
19  
20 111 terciles – proportion of literacy rate obtained from IBGE, 2010 and state-level income in  
21  
22 112 terciles (nominal income per capita - average monthly value - in permanent private housing  
23  
24 113 obtained from IBGE, 2010).

25  
26  
27  
28  
29 114 Statistical analyses were performed using Stata 12.1 software and the *svy* command was used,  
30  
31 115 which takes into consideration sample weights. Sample weights were defined for the primary  
32  
33 116 sampling units, households and all inhabitants, as well as for the selected inhabitant.

34  
35  
36 117 Complete information about PNS sample weights and sampling process have been published  
37  
38 118 elsewhere [15, 16]. The results from the sample were expanded for the Brazilian population.

39  
40  
41 119 Descriptive analysis was based on the calculation of prevalence and its respective confidence  
42  
43 120 intervals. Factor analysis (FA) was performed to identify patterns of morbidities[19]. This  
44  
45 121 analysis was based on tetrachoric correlation, this being more appropriate than Pearson's  
46  
47 122 correlation for dichotomous variables [20]. Before FA analysis, Kaiser-Meyer-Olkin (KMO)  
48  
49 123 and Bartlett sphericity tests were used to evaluate the applicability of this approach. After the  
50  
51 124 first evaluation of the model, some variables were excluded (bronchitis, emphysema, other  
52  
53 125 lung disease, other mental disease and other heart disease) in order to obtain a better model  
54  
55 126 fit. Oblique (oblimin or promax) rotation was performed. In order to establish the number of  
56  
57  
58  
59  
60

1  
2  
3  
4 127 components to be retained, we used Cattell graphics, Kaiser criteria (eigenvalue>1) and  
5  
6 128 minimum explained variance (>10% for each component). Variables with loadings  $\geq 0.3$   
7  
8 129 were kept [21]. Through factorial analysis, we obtained the predicted scores of morbidities  
9  
10 130 (factors).

11  
12  
13 131 Multilevel models were performed to account for state-level variance, with the individuals as  
14  
15 132 the first level and the state of residence as the second level. First, the models were initially  
16  
17 133 adjusted without inclusion of the independent variables (null model) to test the initial variance  
18  
19 134 attributable to the state accounting for approximately 1% ( $p < 0.05$ ) of variance for the four  
20  
21 135 analyses (Multimorbidity  $\geq 2$ ; Multimorbidity  $\geq 3$ , factor 1 and factor 2). Then, we performed a  
22  
23 136 logistic regression model for multimorbidity ( $\geq 2$  and  $\geq 3$  morbidities) and linear regression  
24  
25 137 models to evaluate the association of factors (patterns) of diseases and independent variables.  
26  
27 138 We included sex, age, skin color, marital status, schooling in years, private health plan,  
28  
29 139 geographical area, state-level education and income in these models.  
30  
31  
32  
33  
34  
35  
36  
37  
38  
39  
40  
41  
42  
43  
44  
45  
46  
47  
48  
49  
50  
51  
52  
53  
54  
55  
56  
57  
58  
59  
60



## 140 Results

141 The sample was comprised of 60,202 adults. The most frequent diseases were High Blood  
142 Pressure (22.3%) and Spinal column problem (19.0%). Angina, emphysema, other lung  
143 disease, bipolar disorder, other mental disease, schizophrenia and Obsessive Compulsive  
144 Disorder (OCD) were present in less than 1% of the sample. Lung disease problems showed,  
145 on average, longer duration of disease. Greater comorbidities were observed for individuals  
146 with health problems (heart attack; heart failure and angina). The mean range of comorbidities  
147 was from 2.3 to 4.5 diseases (Table 1).

148 Females comprised 55.1% of the sample and mean age was 43.7 years (SD=17.0), ranging  
149 from 18 to 101. Most individuals reported white skin color (47.8%) followed by brown  
150 (41.7%). Almost two thirds lived with a partner. Out of the total sample, 45.2% had  $\geq 12$  years  
151 of schooling and 13.9% had zero schooling. Less than one third had a private health plan and  
152 13.5% lived in rural areas (Table 2). The mean average proportion of literacy rate at the state-  
153 level was 7.3%, ranging from 3.3% to 22.5%. The average monthly value of nominal income  
154 per capita was R\$ 1,069 (approximately US\$ 644 in 2010).

155 The occurrence of multimorbidity was 22.2% (CI95% 21.5; 22.9) for  $\geq 2$  morbidities and  
156 10.2% (CI95% 9.7; 10.7) for  $\geq 3$  morbidities. Irrespective of cut-off point, multimorbidity was  
157 higher in females, older people, individuals reporting white skin color, who lived with a  
158 partner, had less schooling, had a private health plan and living in urban areas. At state-level,  
159 multimorbidity was more frequent in states with higher education levels and wealthier states  
160 (Table 2).

161 In the adjusted multilevel models, females had 1.86 (CI95% 1.78; 1.95) and 1.97 (CI95%  
162 1.85; 2.10) more odds of multimorbidity than males, for  $\geq 2$  and  $\geq 3$  morbidities, respectively.

1  
2  
3  
4 163 In all cases, every additional year of age increased by 1.06 times the odds of multiples  
5  
6 164 diseases. Self-reported skin color was not associated with multimorbidity in the adjusted  
7  
8  
9 165 models. On average, living with a partner increased by 1.15 times the odds of the outcome.  
10  
11 166 Compared to individuals with  $\geq 12$  years of schooling, adults with 1-8 years of schooling had  
12  
13 167 more odds of multimorbidity (OR 1.40 - CI95% 1.32; 1.49, for  $\geq 2$  diseases and OR 1.58  
14  
15 168 CI95% 1.45; 1.72, for  $\geq 3$  morbidities). In general, adults in the second and third wealthiest  
16  
17 169 quintiles had greater odds of multimorbidity. Individuals with private health plans and who  
18  
19 170 lived in urban areas had greater odds of multiple diseases. Individuals who lived in states with  
20  
21 171 low and middle education levels had less multimorbidity compared to states with high  
22  
23 172 education levels. With regard to income at state-level, the higher multimorbidity difference  
24  
25 173 was demonstrated simply by comparing low with high income states (Table 3).

26  
27  
28  
29 174 In the FA analysis, the KMO coefficient was 0.84. Two patterns of morbidities explained  
30  
31 175 92% of total variance, after rotation. The two components identified were: (1)  
32  
33 176 cardiometabolic problems (High Blood Pressure, heart attack, angina, heart failure, stroke,  
34  
35 177 hypercholesterolemia, diabetes and arthritis/rheumatism); (2) Respiratory/mental/muscle-  
36  
37 178 skeletal disorders (arthritis/rheumatism, spinal column problem, asthma/wheezy bronchitis,  
38  
39 179 COPD, work-related muscle-skeletal disorders, depression, bipolar disorder and kidney  
40  
41 180 problem) (Table4).

42  
43  
44  
45 181 The adjusted multilevel analyses of the two factors are presented in Table 5. Overall, the  
46  
47 182 results were similar to those observed in Table 3. Females, older people, those with less  
48  
49 183 schooling, those with intermediate asset ownership quintiles and who had private health plans  
50  
51 184 showed more burden of factors. People who lived in rural geographical areas showed less  
52  
53 185 burden of the cardiometabolic factor. Individuals with partners presented less burden of the  
54  
55 186 Respiratory/mental/muscle-skeletal factor compared to individuals who did not have a  
56  
57  
58  
59  
60

1  
2  
3  
4 187 partner. Cardiometabolic and Respiratory/mental/muscle-skeletal factors were greater when  
5  
6 188 state-level education and income were lower.  
7  
8  
9  
10  
11  
12  
13  
14  
15  
16  
17  
18  
19  
20  
21  
22  
23  
24  
25  
26  
27  
28  
29  
30  
31  
32  
33  
34  
35  
36  
37  
38  
39  
40  
41  
42  
43  
44  
45  
46  
47  
48  
49  
50  
51  
52  
53  
54  
55  
56  
57  
58  
59  
60

For peer review only

1  
2  
3  
4 189 **Discussion**

5  
6  
7 190 Multimorbidity frequency in Brazil is considerable; one in every five Brazilian adults had two  
8  
9 191 or more morbidities and one in every ten had three or more morbidities. Individual and state-  
10  
11 192 level inequalities suggest the complexity of factors and their relationship with multimorbidity  
12  
13 193 occurrence. To our knowledge, this is the first representative Brazilian study to consider  
14  
15 194 individual and contextual factors associated with multimorbidity and its clusters.  
16  
17

18  
19 195 The study's national representativeness enables us to extrapolate frequencies for the whole  
20  
21 196 Brazilian adult population. Considering 190,755,799 million adults in the most recent  
22  
23 197 Brazilian population census (2010), we are able to infer that approximately 42.7 and 19.5  
24  
25 198 million Brazilian adults had two or more and three or more diseases, respectively. These  
26  
27 199 results bring important challenges for the health system which will need to be more  
28  
29 200 comprehensive in order to deal with the complexity of multimorbidity. Some of the issues are  
30  
31 201 related to need to include multimorbidity in guidelines on reporting these problems to health  
32  
33 202 professionals, as well as giving more emphasis to multimorbidity on health-related university  
34  
35 203 curricula.  
36  
37

38  
39 204 Relative comparisons with Western countries reveal similar occurrence of two or more  
40  
41 205 diseases in Spain[22] (20.0%; CI95%: 18.8-21.2) and almost ten percentage points less than  
42  
43 206 in Scotland [23] (31.1%, 25 or more years) and Canada[24] (30.9%; CI95% 29.5 – 32.4).In  
44  
45 207 low and middle income countries (LMIC), estimates from countries (China, Ghana, India,  
46  
47 208 Mexico, Russia, and South Africa) included in the WHO Study on global AGEing and adult  
48  
49 209 health (SAGE) Wave-1 (2007/10), found 21.9% (CI95%: 20.9; 22.9) of multimorbidity  
50  
51 210 occurrence ( $\geq 2$  diseases from a list from eight morbidities)[5]. This occurrence varied from  
52  
53 211 20.3% in China to 34.7% in Russia. In the present analysis, we used more diseases to  
54  
55  
56  
57  
58  
59  
60

1  
2  
3  
4 212 construct multimorbidity (22 against eight in SAGE study). Even so, the prevalence found  
5  
6 213 was, virtually, equal to these other LMIC countries, except for Russia.  
7  
8

9 214 In Brazil, our occurrence findings were lower than frequencies found in a Southern Brazilian  
10  
11 215 city (29.1%; CI95%: 27.1; 31.1 for  $\geq 2$  morbidities, and 14.3 %; CI95%: 12.8; 15.8 for  $\geq 3$   
12  
13 216 morbidities) despite the higher number of morbidities included in this study [10]. The  
14  
15 217 difference observed may be attributed to socioeconomic characteristics of Brazilian states.  
16  
17 218 The Southern states presented more income and schooling which tend to increase the burden  
18  
19 219 of multimorbidity as observed in the results presented here.  
20  
21

22  
23 220 In terms of socio-demographic characteristics, females and older adults presented more  
24  
25 221 multimorbidity as found in previous Brazilian [10, 11] and international studies [25, 26].  
26  
27 222 Women tend to use health services more and to live longer than males, these being factors  
28  
29 223 which explain part of the higher frequency in this group. Older adults show more exposure to  
30  
31 224 events, including unhealthy ones, that contribute to chronic disease incidence. In the same  
32  
33 225 way, individuals who had partners had higher multimorbidity.  
34  
35

36  
37 226 Regarding socioeconomic variables, our results follow the pattern found in overall analysis of  
38  
39 227 LMIC included in the SAGE study. Multimorbidity was not associated with wealth quintiles  
40  
41 228 but presented association with education [5]. In the present analysis, the middle wealth  
42  
43 229 quintile strata and their clusters present more multimorbidity whilst showing a negative dose-  
44  
45 230 response relationship with education. These results may be explained by a strong relationship  
46  
47 231 between educational attainment and all aspects of healthier life including those mainly related  
48  
49 232 to better awareness of chronic disease risk factors [27, 28].  
50  
51

52  
53 233 Having private health plans was associated with multimorbidity and its factors. This may be  
54  
55 234 explained by role of health plans as a socioeconomic indicator but, even more so, by the  
56  
57  
58  
59  
60

1  
2  
3  
4 235 relationship with self-reported diagnosis (used here to construct the outcome). Individuals  
5  
6 236 with health plans tend to use health services more frequently regardless the presence of  
7  
8 237 chronic conditions[29, 30] thus affording more diagnosis.  
9

10  
11 238 Individuals who lived in urban areas presented more multiple diseases. This was similar to  
12  
13 239 results found in the adult population in South Africa [31] and Catalonia (Spain)[32]. In spite  
14  
15 240 of little Brazilian evidence on the topic, as well as the social, cultural and environment  
16  
17 241 differences between rural-urban residents, people from rural areas had more difficulty in  
18  
19 242 accessing health services in Brazil [33]which may explain partially the differences between  
20  
21 243 rural and urban residents in our results of the occurrence of self-reported medical diagnosis of  
22  
23 244 multiple diseases.  
24  
25

26  
27 245 The state-level differences observed reveal a paradoxical association. Instead of individual  
28  
29 246 inequalities are pro-rich, state-level differences are pro-poor. These results might be explained  
30  
31 247 by demographic differences between states in Brazil which may not be fully adjusted with  
32  
33 248 individual demographic variables included in the analysis. Low income and low education in  
34  
35 249 Brazilian states are concentrated in North and Northeast regions and show the poorest health-  
36  
37 250 related indicators[12].  
38  
39

40  
41 251 The two factors (cardiometabolic and respiratory/mental/muscle-skeletal) found have some  
42  
43 252 similarity to recent evidence [34, 35] mainly related to cardiometabolic patterns. The  
44  
45 253 respiratory/mental/muscle-skeletal data found was similar to results found in a worldwide  
46  
47 254 study of people aged 50 or over [36]. The majority of studies, especially with adult  
48  
49 255 populations, found two or three patterns of diseases. These combinations of diseases suggest  
50  
51 256 possible causal relationship between diseases or their risk factors [19]. The cardiometabolic  
52  
53 257 pattern showed a more well know relationship between diseases. On the other hand, the  
54  
55  
56  
57  
58  
59  
60

1  
2  
3  
4 258 relationship between respiratory, mental and muscle-skeletal disorders is less understood. The  
5  
6 259 concomitant occurrence of these diseases is well described [37] but understanding the  
7  
8  
9 260 biological plausibility of causal relationships will be a challenge for new studies. As a first  
10  
11 261 step, more detailed and specific information about onset of diseases will be needed. At the  
12  
13 262 same time, the use of approaches related to network analysis can be useful for a better  
14  
15 263 understanding of causal relationships [38]. Even so, the results presented here may contribute  
16  
17 264 to the inclusion of recommendations in Brazilian clinical guidelines about the relationship  
18  
19 265 with chronic conditions, as well as to designing interventions/public policies considering the  
20  
21 266 presence of multiple diseases in the same individual.  
22  
23

24  
25 267 Some limitations of the study should be addressed. With the exception of depression, all the  
26  
27 268 other morbidities were evaluated by self-reporting. This may provide a misclassification bias  
28  
29 269 even though self-reported diagnosis is considered an adequate and common source of  
30  
31 270 information used in population-based studies on multimorbidity [4, 39, 40]. Nevertheless, the  
32  
33 271 lack of adequate information about diagnosis, including longitudinal information, limits the  
34  
35 272 causal inference related to concomitant diseases expressed in factorial analysis. Furthermore,  
36  
37 273 we are not able to evaluate the contextual determinants at neighborhood level which may  
38  
39 274 produce more complete associations with state-level differences.  
40  
41

42  
43 275 The absolute and relative number of Brazilian individuals with multimorbidity was high.  
44  
45 276 Addressing the complexity of multiple disease management for at least 19 million people will  
46  
47 277 be a challenge for the health system. The clusters of diseases identified might contribute to  
48  
49 278 strategies for the prevention and clinical care of these diseases. State-level and individual  
50  
51 279 inequalities increase the problem reinforcing the need of a wide lens to organize health  
52  
53 280 services and to decrease the inequities among the Brazilian population.  
54  
55  
56  
57  
58  
59  
60

1  
2  
3  
4 281 **Author contributions**

5  
6 282 BPN designed the article, obtained and analyzes the data, drafted the first version and revised  
7  
8 283 the manuscript. ADPCF and FACF analyzed the data, and drafted and revised the manuscript.  
9  
10 284 SP, DS, TRF, TNM, ET and LAF drafted and revised the manuscript. SBR designed the  
11  
12 285 article, drafted and revised the manuscript. All authors approved the final version of the  
13  
14 286 manuscript.

15 287 **Funding:** There are no funding related to the production of the paper. The Brazilian Ministry  
16  
17 288 of Health financed the PNS survey. The funder of the survey played no role in the study  
18  
19 289 design; collection, analysis, and interpretation of data; writing of the report; or the decision to  
20  
21 290 submit the article for publication.

22 291 **Conflict of interest:** All authors have no potential conflicts.

23  
24 292 **Data sharing statement:** All PNS data are available from the Brazilian Institute of  
25  
26 293 Geography and Statistics website, located here:  
27 294 [http://www.ibge.gov.br/home/estatistica/populacao/pns/2013/default\\_microdados.shtm](http://www.ibge.gov.br/home/estatistica/populacao/pns/2013/default_microdados.shtm).

28  
29  
30  
31  
32  
33  
34  
35  
36  
37  
38  
39  
40  
41  
42  
43  
44  
45  
46  
47  
48  
49  
50  
51  
52  
53  
54  
55  
56  
57  
58  
59  
60 295



296 **References**

- 297 1 Ryan A, Wallace E, O'Hara P, *et al.* Multimorbidity and functional decline in  
298 community-dwelling adults: a systematic review. *Health and quality of life outcomes*  
299 2015;**13**:1-13.
- 300 2 Fortin M, Lapointe L, Hudon C, *et al.* Multimorbidity and quality of life in primary  
301 care: a systematic review. *Health and quality of life outcomes* 2004;**2**:51.
- 302 3 Nunes BP, Flores TR, Mielke GI, *et al.* Multimorbidity and mortality in older adults:  
303 A systematic review and meta-analysis. *Arch Gerontol Geriatr* 2016;**67**:130-8.
- 304 4 Fortin M, Stewart M, Poitras ME, *et al.* A systematic review of prevalence studies on  
305 multimorbidity: toward a more uniform methodology. *Annals of family medicine*  
306 2012;**10**:142-51.
- 307 5 Arokiasamy P, Uttamacharya U, Jain K, *et al.* The impact of multimorbidity on adult  
308 physical and mental health in low- and middle-income countries: what does the study on  
309 global ageing and adult health (SAGE) reveal? *BMC Med* 2015;**13**:178.
- 310 6 Pati S, Agrawal S, Swain S, *et al.* Non communicable disease multimorbidity and  
311 associated health care utilization and expenditures in India: cross-sectional study. *BMC health*  
312 *services research* 2014;**14**:451.
- 313 7 Pati S, Swain S, Hussain MA, *et al.* Prevalence, correlates, and outcomes of  
314 multimorbidity among patients attending primary care in Odisha, India. *BMJ Open*  
315 2015;**13**:446-50.
- 316 8 Pati S, Swain S, Hussain MA, *et al.* Prevalence and outcomes of multimorbidity in  
317 South Asia: a systematic review. 2015;**5**:e007235.
- 318 9 Andrade LH, Bensenor IM, Viana MC, *et al.* Clustering of psychiatric and somatic  
319 illnesses in the general population: multimorbidity and socioeconomic correlates. *Braz J Med*  
320 *Biol Res* 2010;**43**.
- 321 10 Nunes BP, Camargo-Figuera FA, Guttier M, *et al.* Multimorbidity in adults from a  
322 southern Brazilian city: occurrence and patterns. *International journal of public health* 2016.
- 323 11 Nunes BP, Thume E, Facchini LA. Multimorbidity in older adults: magnitude and  
324 challenges for the Brazilian health system. *BMC Public Health* 2015;**15**:1172.
- 325 12 Paim J, Travassos C, Almeida C, *et al.* The Brazilian health system: history, advances,  
326 and challenges. *The Lancet* 2011;**377**:1778-97.
- 327 13 Schmidt MI, Duncan BB, Azevedo e Silva G, *et al.* Chronic non-communicable  
328 diseases in Brazil: burden and current challenges. *Lancet* 2011;**377**.
- 329 14 Andrade LH, Wang Y-P, Andreoni S, *et al.* Mental Disorders in Megacities: Findings  
330 from the São Paulo Megacity Mental Health Survey, Brazil. *PLoS ONE* 2012;**7**:e31879.
- 331 15 Damacena GN, Szwarcwald CL, Malta DC, *et al.* The Development of the National  
332 Health Survey in Brazil, 2013. *Epidemiologia e Serviços de Saúde* 2015;**24**:197-206.
- 333 16 Souza-Júnior PRBd, Freitas MPSd, Antonaci GdA, *et al.* Sampling Design for the  
334 National Health Survey, 2013. *Epidemiologia e Serviços de Saúde* 2015;**24**:207-16.
- 335 17 Santos IS, Tavares BF, Munhoz TN, *et al.* Sensibilidade e especificidade do Patient  
336 Health Questionnaire-9 (PHQ-9) entre adultos da população geral. *Cadernos de Saúde*  
337 *Pública* 2013;**29**:1533-43.
- 338 18 Harrison C, Britt H, Miller G, *et al.* Examining different measures of multimorbidity,  
339 using a large prospective cross-sectional study in Australian general practice. *BMJ Open*  
340 2014;**4**.
- 341 19 Schäfer I, von Leitner E-C, Schön G, *et al.* Multimorbidity Patterns in the Elderly: A  
342 New Approach of Disease Clustering Identifies Complex Interrelations between Chronic  
343 Conditions. *PLoS ONE* 2010;**5**:e15941.

- 1  
2  
3  
4 344 20 Kubinger K. On artificial results due to using factor analysis for dichotomous  
5 345 variables. *Psychology Science* 2003;**45**.
- 6 346 21 Norman G, Streiner D. Principal Components and Factor Analysis. Fooling Around  
7 347 with Factors. *Biostatistics: the bare essentials*. Hamilton: Bc Decker 2008.
- 8 348 22 Garin N, Olaya B, Perales J, *et al*. Multimorbidity patterns in a national representative  
9 349 sample of the Spanish adult population. *PLoS One* 2014;**9**:e84794.
- 10 350 23 Barnett K, Mercer SW, Norbury M, *et al*. Epidemiology of multimorbidity and  
11 351 implications for health care, research, and medical education: a cross-sectional study. *Lancet*  
12 352 2012;**380**:37-43.
- 13 353 24 Agborsangaya CB, Ngwakongnwi E, Lahtinen M, *et al*. Multimorbidity prevalence in  
14 354 the general population: the role of obesity in chronic disease clustering. *BMC Public Health*  
15 355 2013;**13**:1161.
- 16 356 25 Violan C, Foguet-Boreu Q, Flores-Mateo G, *et al*. Prevalence, determinants and  
17 357 patterns of multimorbidity in primary care: a systematic review of observational studies. *PLoS*  
18 358 *One* 2014;**9**.
- 19 359 26 Afshar S, Roderick PJ, Kowal P, *et al*. Multimorbidity and the inequalities of global  
20 360 ageing: a cross-sectional study of 28 countries using the World Health Surveys. *BMC Public*  
21 361 *Health* 2015;**15**:1-10.
- 22 362 27 Montez JK, Friedman EM. Educational attainment and adult health: Under what  
23 363 conditions is the association causal? *Social Science & Medicine* 2015;**127**:1-7.
- 24 364 28 CSDH. Closing the gap in a generation: health equity through action on the social  
25 365 determinants of health. Final Report of the Commission on Social Determinants of Health.  
26 366 Geneva: World Health Organization 2008.
- 27 367 29 Skinner EH, Foster M, Mitchell G, *et al*. Effect of health insurance on the utilisation of  
28 368 allied health services by people with chronic disease: a systematic review and meta-analysis.  
29 369 *Australian Journal of Primary Health* 2014;**20**:9-19.
- 30 370 30 Chung RY, Mercer SW, Yip BH, *et al*. The association between types of regular  
31 371 primary care and hospitalization among people with and without multimorbidity: A household  
32 372 survey on 25,780 Chinese. *Scientific reports* 2016;**6**:29758.
- 33 373 31 Alaba O, Chola L. The social determinants of multimorbidity in South Africa.  
34 374 *International journal for equity in health* 2013;**12**:1-10.
- 35 375 32 Foguet-Boreu Q, Violan C, Roso-Llorach A, *et al*. Impact of multimorbidity: acute  
36 376 morbidity, area of residency and use of health services across the life span in a region of south  
37 377 Europe. *BMC Family Practice* 2014;**15**:1-11.
- 38 378 33 Macinko J, Lima Costa MF. Access to, use of and satisfaction with health services  
39 379 among adults enrolled in Brazil's Family Health Strategy: evidence from the 2008 National  
40 380 Household Survey. *Tropical medicine & international health : TM & IH* 2012;**17**:36-42.
- 41 381 34 Prados-Torres A, Calderón-Larrañaga A, Hanco-Saavedra J, *et al*. Multimorbidity  
42 382 patterns: a systematic review. *Journal of Clinical Epidemiology* 2014;**67**:254-66.
- 43 383 35 Prados-Torres A, Poblador-Plou B, Calderón-Larrañaga A, *et al*. Multimorbidity  
44 384 Patterns in Primary Care: Interactions among Chronic Diseases Using Factor Analysis. *PLoS*  
45 385 *ONE* 2012;**7**:e32190.
- 46 386 36 Garin N, Koyanagi A, Chatterji S, *et al*. Global Multimorbidity Patterns: A Cross-  
47 387 Sectional, Population-Based, Multi-Country Study. *The Journals of Gerontology Series A:*  
48 388 *Biological Sciences and Medical Sciences* 2016;**71**:205-14.
- 49 389 37 Barnes PJ, Celli BR. Systemic manifestations and comorbidities of COPD. *European*  
50 390 *Respiratory Journal* 2009;**33**:1165-85.

- 1  
2  
3  
4 391 38 Faner R, Cruz T, López-Giraldo A, *et al.* Network medicine, multimorbidity and the  
5 392 lung in the elderly. *European Respiratory Journal* 2014;**44**:775-88.  
6 393 39 Huntley AL, Johnson R, Purdy S, *et al.* Measures of multimorbidity and morbidity  
7 394 burden for use in primary care and community settings: a systematic review and guide.  
8 395 *Annals of family medicine* 2012;**10**:134-41.  
9 396 40 Violan C, Foguet-Boreu Q, Hermosilla-Perez E, *et al.* Comparison of the information  
10 397 provided by electronic health records data and a population health survey to estimate  
11 398 prevalence of selected health conditions and multimorbidity. *BMC Public Health*  
12 399 2013;**13**:251.

14  
15 400  
16  
17  
18  
19  
20  
21  
22  
23  
24  
25  
26  
27  
28  
29  
30  
31  
32  
33  
34  
35  
36  
37  
38  
39  
40  
41  
42  
43  
44  
45  
46  
47  
48  
49  
50  
51  
52  
53  
54  
55  
56  
57  
58  
59  
60

For peer review only

401 **Tables and figures**

402 Table 1. Individual prevalence, duration and number of comorbidities for each morbidity  
 403 evaluated. Brazil, 2013.

| Morbidities                            | Individual prevalence |             | Duration of disease    | Number of comorbidities |
|----------------------------------------|-----------------------|-------------|------------------------|-------------------------|
|                                        | %                     | (95%CI)     | Mean (median; Q25-Q75) | Mean (median; Q25-Q75)  |
| High Blood Pressure                    | 22.3                  | 21.7 - 23.0 | 13.1 (9; 3-18)         | 2.3 (2; 1-3)            |
| Spinal column problem                  | 19.0                  | 18.3 - 19.7 | 14.7 (10; 4-21)        | 2.3 (2; 1-3)            |
| Hypercholesterolemia                   | 8.4                   | 8.0 - 8.8   | 6.9 (3; 1-9)           | 2.3 (2; 1-3)            |
| Arthritis/rheumatism                   | 6.7                   | 6.4 - 7.1   | 14.6 (10; 3-20)        | 3.0 (3; 2-4)            |
| Diabetes                               | 6.5                   | 6.2 - 6.9   | 11.3 (6; 2-15)         | 2.9 (3; 2-4)            |
| Asthma/wheezy bronchitis               | 4.4                   | 4.1 - 4.8   | 25.1 (23; 13-35)       | 2.4 (2; 1-3)            |
| Depression                             | 4.2                   | 3.9 - 4.5   | -                      | 2.9 (3; 2-4)            |
| Work-related muscle-skeletal disorders | 2.5                   | 2.2 - 2.8   | 7.5 (5; 2-11)          | 2.5 (2; 1-3)            |
| Cancer                                 | 1.9                   | 1.7 - 2.2   | 8.5 (6; 2-13)          | 2.8 (2; 2-4)            |
| Another heart disease                  | 1.9                   | 1.6 - 2.1   | 13.9 (9; 3-20)         | 3.1 (3; 2-4)            |
| Stroke                                 | 1.6                   | 1.4 - 1.8   | 10.2 (6; 2-13)         | 3.4 (3; 2-5)            |
| Kidney problem                         | 1.5                   | 1.3 - 1.7   | 13.5 (9; 3-20)         | 3.2 (3; 2-4)            |
| Heart attack                           | 1.3                   | 1.2 - 1.5   | 12.4 (7; 2-18)         | 4.0 (4; 3-5)            |
| Heart failure                          | 1.2                   | 1.1 - 1.4   | 13.2 (8; 4-19)         | 4.0 (4; 2-5)            |
| Bronchitis                             | 1.0                   | 0.8 - 1.1   | 23.2 (20; 9-32)        | 3.3 (3; 2-5)            |
| Angina                                 | 0.8                   | 0.7 - 0.9   | 15.5 (11; 5-21)        | 4.5 (4; 3-6)            |
| Emphysema                              | 0.5                   | 0.4 - 0.6   | 14.9 (9; 3-18)         | 3.7 (3; 2-5)            |
| Another lung disease                   | 0.5                   | 0.4 - 0.6   | 16.2 (12; 5-24)        | 2.8 (2; 1-4)            |
| Bipolar disorder                       | 0.4                   | 0.3 - 0.5   | 11.3 (8; 4-16)         | 3.1 (3; 2-4)            |
| Another mental disease                 | 0.3                   | 0.2 - 0.4   | 2.8 (2; 1-4)           | 2.5 (2; 1-3)            |
| Schizophrenia                          | 0.2                   | 0.2 - 0.3   | 19.7 (19; 8-26)        | 2.7 (3; 2-3)            |
| Obsessive Compulsive Disorder (OCD)    | 0.2                   | 0.1 - 0.2   | 14.5 (12; 6-21)        | 3.4 (3; 2-4)            |

404

405

406 Table 2. Description of the sample and multimorbidity frequency. Brazil, 2013.

| Variables                             | n      | %    | Multimorbidity |             |      |             |
|---------------------------------------|--------|------|----------------|-------------|------|-------------|
|                                       |        |      | %              | ≥2<br>95%CI | %    | ≥3<br>95%CI |
| <b>Sex</b>                            |        |      |                |             |      |             |
| Male                                  | 25,920 | 44.9 | 17.5           | 16.6; 18.3  | 7.2  | 6.6; 7.8    |
| Female                                | 34,282 | 55.1 | 26.1           | 25.2; 27.0  | 12.6 | 12.0; 13.3  |
| <b>Age (in years)</b>                 |        |      |                |             |      |             |
| 18 to 29                              | 14,321 | 24.3 | 4.9            | 4.2; 5.6    | 1.2  | 0.9; 1.5    |
| 30 to 39                              | 14,269 | 21.0 | 10.6           | 9.6; 11.5   | 2.8  | 2.3; 3.3    |
| 40 to 49                              | 11,405 | 18.8 | 20.8           | 19.5; 22.1  | 7.8  | 7.0; 8.6    |
| 50 to 59                              | 9,030  | 16.8 | 32.9           | 31.2; 34.6  | 15.5 | 14.3; 16.8  |
| 60 to 69                              | 6,238  | 10.8 | 46.3           | 44.1; 48.6  | 24.7 | 22.8; 26.6  |
| 70 to 79                              | 3,441  | 5.7  | 52.2           | 49.2; 55.2  | 30.9 | 28.0; 33.9  |
| 80 or more                            | 1,498  | 2.6  | 52.8           | 48.6; 57.0  | 30.6 | 26.5; 34.7  |
| <b>Skin color*</b>                    |        |      |                |             |      |             |
| White                                 | 24,106 | 47.8 | 24.3           | 23.3; 25.4  | 11.6 | 10.8; 12.3  |
| Black                                 | 5,631  | 9.2  | 22.2           | 20.2; 24.2  | 10.3 | 8.9; 11.6   |
| Brown                                 | 29,512 | 41.7 | 19.8           | 18.9; 20.6  | 8.6  | 8.1; 9.2    |
| <b>Marital status</b>                 |        |      |                |             |      |             |
| Without partner                       | 25,680 | 38.4 | 20.6           | 19.7; 21.5  | 9.9  | 9.3; 10.6   |
| With partner                          | 34,522 | 61.6 | 23.2           | 22.4; 24.1  | 10.4 | 9.7; 11.0   |
| <b>Schooling (in years)</b>           |        |      |                |             |      |             |
| 0                                     | 9,434  | 13.9 | 33.2           | 31.4; 35.0  | 16.3 | 14.9; 17.7  |
| 1-8                                   | 14,649 | 25.7 | 30.0           | 28.6; 31.4  | 16.1 | 14.9; 17.2  |
| 8-11                                  | 9,215  | 15.3 | 17.9           | 16.5; 19.3  | 7.5  | 6.5; 8.4    |
| ≥12                                   | 26,904 | 45.2 | 15.8           | 15.0; 16.7  | 5.9  | 5.4; 6.5    |
| <b>Asset ownership (in quintiles)</b> |        |      |                |             |      |             |
| 1° (High)                             | 10,153 | 22.3 | 22.0           | 20.5; 23.6  | 9.3  | 8.3; 10.4   |
| 2°                                    | 11,531 | 22.4 | 22.3           | 21.0; 23.6  | 10.5 | 9.5; 11.5   |
| 3°                                    | 11,621 | 19.5 | 23.1           | 21.8; 24.4  | 10.6 | 9.7; 11.5   |
| 4°                                    | 14,380 | 21.0 | 22.2           | 20.9; 23.5  | 10.6 | 9.7; 11.6   |
| 5° (Low)                              | 12,517 | 14.7 | 21.3           | 19.9; 22.7  | 9.9  | 8.9; 10.9   |
| <b>Private health plan</b>            |        |      |                |             |      |             |
| No                                    | 43,834 | 69.4 | 21.1           | 20.3; 21.9  | 9.8  | 9.3; 10.4   |
| Yes                                   | 16,368 | 30.6 | 24.8           | 23.5; 26.1  | 11.0 | 10.1; 12.0  |
| <b>Geographical area</b>              |        |      |                |             |      |             |
| Urban                                 | 49,245 | 86.5 | 22.8           | 22.0; 23.5  | 10.5 | 10.0; 11.1  |
| Rural                                 | 10,957 | 13.5 | 18.6           | 17.2; 20.0  | 8.0  | 7.1; 8.8    |
| <b>State-level education</b>          |        |      |                |             |      |             |
| High                                  | 22,382 | 37.2 | 24.7           | 23.7; 25.7  | 11.7 | 10.9; 12.4  |
| Middle                                | 19,515 | 32.4 | 20.1           | 18.6; 21.7  | 9.3  | 8.3; 10.4   |

|    |                           |               |              |             |                   |             |                  |
|----|---------------------------|---------------|--------------|-------------|-------------------|-------------|------------------|
| 1  |                           |               |              |             |                   |             |                  |
| 2  |                           |               |              |             |                   |             |                  |
| 3  |                           |               |              |             |                   |             |                  |
| 4  | Low                       | 18,305        | 30.4         | 19.0        | 18.0; 20.1        | 8.0         | 7.3; 8.6         |
| 5  | <b>State-level income</b> |               |              |             |                   |             |                  |
| 6  |                           |               |              |             |                   |             |                  |
| 7  | High                      | 21,683        | 36.0         | 24.6        | 23.6; 25.7        | 11.6        | 10.8; 12.3       |
| 8  | Middle                    | 18,087        | 30.0         | 21.8        | 20.2; 23.3        | 10.5        | 9.5; 11.6        |
| 9  | Low                       | 20,432        | 33.9         | 18.2        | 17.2; 19.2        | 7.5         | 6.9; 8.1         |
| 10 | <b>Total</b>              | <b>60,202</b> | <b>100.0</b> | <b>22.2</b> | <b>21.5; 22.9</b> | <b>10.2</b> | <b>9.7; 10.7</b> |
| 11 |                           |               |              |             |                   |             |                  |
| 12 |                           |               |              |             |                   |             |                  |
| 13 |                           |               |              |             |                   |             |                  |
| 14 |                           |               |              |             |                   |             |                  |
| 15 |                           |               |              |             |                   |             |                  |
| 16 |                           |               |              |             |                   |             |                  |
| 17 |                           |               |              |             |                   |             |                  |
| 18 |                           |               |              |             |                   |             |                  |
| 19 |                           |               |              |             |                   |             |                  |
| 20 |                           |               |              |             |                   |             |                  |
| 21 |                           |               |              |             |                   |             |                  |
| 22 |                           |               |              |             |                   |             |                  |
| 23 |                           |               |              |             |                   |             |                  |
| 24 |                           |               |              |             |                   |             |                  |
| 25 |                           |               |              |             |                   |             |                  |
| 26 |                           |               |              |             |                   |             |                  |
| 27 |                           |               |              |             |                   |             |                  |
| 28 |                           |               |              |             |                   |             |                  |
| 29 |                           |               |              |             |                   |             |                  |
| 30 |                           |               |              |             |                   |             |                  |
| 31 |                           |               |              |             |                   |             |                  |
| 32 |                           |               |              |             |                   |             |                  |
| 33 |                           |               |              |             |                   |             |                  |
| 34 |                           |               |              |             |                   |             |                  |
| 35 |                           |               |              |             |                   |             |                  |
| 36 |                           |               |              |             |                   |             |                  |
| 37 |                           |               |              |             |                   |             |                  |
| 38 |                           |               |              |             |                   |             |                  |
| 39 |                           |               |              |             |                   |             |                  |
| 40 |                           |               |              |             |                   |             |                  |
| 41 |                           |               |              |             |                   |             |                  |
| 42 |                           |               |              |             |                   |             |                  |
| 43 |                           |               |              |             |                   |             |                  |
| 44 |                           |               |              |             |                   |             |                  |
| 45 |                           |               |              |             |                   |             |                  |
| 46 |                           |               |              |             |                   |             |                  |
| 47 |                           |               |              |             |                   |             |                  |
| 48 |                           |               |              |             |                   |             |                  |
| 49 |                           |               |              |             |                   |             |                  |
| 50 |                           |               |              |             |                   |             |                  |
| 51 |                           |               |              |             |                   |             |                  |
| 52 |                           |               |              |             |                   |             |                  |
| 53 |                           |               |              |             |                   |             |                  |
| 54 |                           |               |              |             |                   |             |                  |
| 55 |                           |               |              |             |                   |             |                  |
| 56 |                           |               |              |             |                   |             |                  |
| 57 |                           |               |              |             |                   |             |                  |
| 58 |                           |               |              |             |                   |             |                  |
| 59 |                           |               |              |             |                   |             |                  |
| 60 |                           |               |              |             |                   |             |                  |

For peer review only

407 Table 3. Adjusted multilevel models of multimorbidity with independent variables. Brazil, 2013.

| Variables                                         | Multimorbidity (≥2) |                   |             |                   |             |                   | Multimorbidity (≥3) |                   |             |                   |             |                   |
|---------------------------------------------------|---------------------|-------------------|-------------|-------------------|-------------|-------------------|---------------------|-------------------|-------------|-------------------|-------------|-------------------|
|                                                   | Model 1             |                   | Model 2     |                   | Model 3     |                   | Model 1             |                   | Model 2     |                   | Model 3     |                   |
|                                                   | OR                  | CI95%             | OR          | CI95%             | OR          | CI95%             | OR                  | CI95%             | OR          | CI95%             | OR          | CI95%             |
| <b>Sex (ref: male)</b>                            |                     |                   |             |                   |             |                   |                     |                   |             |                   |             |                   |
| Female                                            | <b>1.84</b>         | <b>1.76; 1.94</b> | <b>1.85</b> | <b>1.77; 1.94</b> | <b>1.85</b> | <b>1.77; 1.94</b> | <b>1.95</b>         | <b>1.83; 2.08</b> | <b>1.95</b> | <b>1.83; 2.08</b> | <b>1.95</b> | <b>1.83; 2.09</b> |
| <b>Age (in years)</b>                             | <b>1.06</b>         | <b>1.06; 1.06</b> | <b>1.06</b> | <b>1.06; 1.06</b> | <b>1.06</b> | <b>1.06; 1.06</b> | <b>1.06</b>         | <b>1.06; 1.06</b> | <b>1.06</b> | <b>1.06; 1.06</b> | <b>1.06</b> | <b>1.06; 1.06</b> |
| <b>Skin color* (ref: White)</b>                   |                     |                   |             |                   |             |                   |                     |                   |             |                   |             |                   |
| Black                                             | 1.07                | 0.99; 1.16        | 1.08        | 0.99; 1.17        | 1.08        | 0.99; 1.17        | 1.09                | 0.98; 1.21        | 1.09        | 0.98; 1.21        | 1.09        | 0.98; 1.21        |
| Brown                                             | 1.01                | 0.96; 1.06        | 1.01        | 0.96; 1.07        | 1.01        | 0.96; 1.07        | 0.97                | 0.91; 1.04        | 0.97        | 0.91; 1.04        | 0.97        | 0.91; 1.04        |
| <b>Marital status (ref: Without partner)</b>      |                     |                   |             |                   |             |                   |                     |                   |             |                   |             |                   |
| With partner                                      | <b>1.13</b>         | <b>1.08; 1.18</b> | <b>1.13</b> | <b>1.08; 1.19</b> | <b>1.13</b> | <b>1.08; 1.19</b> | <b>1.17</b>         | <b>1.09; 1.24</b> | <b>1.17</b> | <b>1.09; 1.24</b> | <b>1.17</b> | <b>1.09; 1.24</b> |
| <b>Schooling (in years) # (ref: ≥12)</b>          |                     |                   |             |                   |             |                   |                     |                   |             |                   |             |                   |
| 8-11                                              | <b>1.19</b>         | <b>1.11; 1.28</b> | <b>1.19</b> | <b>1.10; 1.28</b> | <b>1.19</b> | <b>1.10; 1.28</b> | <b>1.22</b>         | <b>1.10; 1.35</b> | <b>1.22</b> | <b>1.10; 1.35</b> | <b>1.22</b> | <b>1.10; 1.35</b> |
| 1-8                                               | <b>1.41</b>         | <b>1.33; 1.51</b> | <b>1.41</b> | <b>1.33; 1.50</b> | <b>1.41</b> | <b>1.33; 1.50</b> | <b>1.57</b>         | <b>1.44; 1.71</b> | <b>1.57</b> | <b>1.44; 1.71</b> | <b>1.57</b> | <b>1.44; 1.71</b> |
| 0                                                 | <b>1.34</b>         | <b>1.24; 1.44</b> | <b>1.34</b> | <b>1.24; 1.44</b> | <b>1.34</b> | <b>1.24; 1.44</b> | <b>1.41</b>         | <b>1.27; 1.56</b> | <b>1.41</b> | <b>1.28; 1.56</b> | <b>1.41</b> | <b>1.28; 1.56</b> |
| <b>Asset ownership (in quintiles) (ref: High)</b> |                     |                   |             |                   |             |                   |                     |                   |             |                   |             |                   |
| 2°                                                | <b>1.12</b>         | <b>1.04; 1.20</b> | <b>1.12</b> | <b>1.04; 1.20</b> | <b>1.12</b> | <b>1.04; 1.20</b> | <b>1.15</b>         | <b>1.04; 1.28</b> | <b>1.15</b> | <b>1.04; 1.28</b> | <b>1.15</b> | <b>1.04; 1.28</b> |
| 3°                                                | <b>1.21</b>         | <b>1.12; 1.31</b> | <b>1.21</b> | <b>1.12; 1.31</b> | <b>1.21</b> | <b>1.12; 1.31</b> | <b>1.19</b>         | <b>1.07; 1.33</b> | <b>1.19</b> | <b>1.07; 1.33</b> | <b>1.19</b> | <b>1.07; 1.33</b> |
| 4°                                                | 1.05                | 0.96; 1.14        | 1.05        | 0.97; 1.14        | 1.05        | 0.97; 1.14        | 1.09                | 0.98; 1.22        | 1.10        | 0.98; 1.23        | 1.10        | 0.98; 1.23        |
| 5° (Low)                                          | 0.91                | 0.83; 1.00        | 0.92        | 0.84; 1.01        | 0.92        | 0.84; 1.01        | 0.95                | 0.84; 1.08        | 0.95        | 0.84; 1.08        | 0.95        | 0.84; 1.08        |
| <b>Private health plan (ref: no)</b>              |                     |                   |             |                   |             |                   |                     |                   |             |                   |             |                   |
| Yes                                               | <b>1.15</b>         | <b>1.08; 1.21</b> | <b>1.15</b> | <b>1.08; 1.20</b> | <b>1.15</b> | <b>1.08; 1.20</b> | <b>1.09</b>         | <b>1.01; 1.18</b> | <b>1.09</b> | <b>1.01; 1.18</b> | <b>1.09</b> | <b>1.01; 1.18</b> |
| <b>Geographical area (ref: urban)</b>             |                     |                   |             |                   |             |                   |                     |                   |             |                   |             |                   |
| Rural                                             | <b>0.86</b>         | <b>0.80; 0.92</b> | <b>0.86</b> | <b>0.80; 0.92</b> | <b>0.86</b> | <b>0.80; 0.92</b> | <b>0.78</b>         | <b>0.71; 0.86</b> | <b>0.78</b> | <b>0.71; 0.86</b> | <b>0.78</b> | <b>0.71; 0.86</b> |
| <b>State-level education (ref: High)</b>          |                     |                   |             |                   |             |                   |                     |                   |             |                   |             |                   |
| Middle                                            |                     |                   | <b>0.82</b> | <b>0.71; 0.94</b> |             |                   |                     |                   | <b>0.76</b> | <b>0.64; 0.90</b> |             |                   |
| Low                                               |                     |                   | <b>0.83</b> | <b>0.72; 0.96</b> |             |                   |                     |                   | <b>0.76</b> | <b>0.64; 0.90</b> |             |                   |
| <b>State-level income (ref: High)</b>             |                     |                   |             |                   |             |                   |                     |                   |             |                   |             |                   |
| Middle                                            |                     |                   |             |                   | 0.89        | 0.77; 1.04        |                     |                   |             |                   | 0.88        | 0.73; 1.05        |
| Low                                               |                     |                   |             |                   | <b>0.82</b> | <b>0.71; 0.95</b> |                     |                   |             |                   | <b>0.75</b> | <b>0.63; 0.89</b> |

408

409 Table 4. Factor analysis. Brazil, 2013.

| Morbidities                            | Factor 1    | Factor 2    |
|----------------------------------------|-------------|-------------|
| High Blood Pressure                    | 0.77        |             |
| Heart attack                           | 0.79        |             |
| Angina                                 | 0.68        |             |
| Heart failure                          | 0.69        |             |
| Stroke                                 | 0.58        |             |
| Hypercholesterolemia                   | 0.57        |             |
| Diabetes                               | 0.62        |             |
| Arthritis/rheumatism                   | 0.30        | 0.37        |
| Spinal column problem                  |             | 0.45        |
| Asthma/wheezy bronchitis               |             | 0.57        |
| COPD                                   |             | 0.63        |
| Work-related muscle-skeletal disorders |             | 0.45        |
| Depression                             |             | 0.46        |
| Bipolar disorder                       |             | 0.46        |
| Kidney problem                         |             | 0.31        |
| Cancer                                 | -           | -           |
| Eigenvalor                             | 4.46        | 1.11        |
| Explained variance %*                  | 0.73 (0.69) | 0.18 (0.47) |
| KMO                                    |             | 0.84        |

\*Before oblique rotation (after oblique rotation)

410



411 Table 5. Adjusted multilevel models of patterns of diseases (factors) with independent variables. Brazil, 2013.

| Variables                                                           | Factor 1 (Cardiometabolic) |              |         |              |         |              | Factor 2 (Respiratory/mental/<br>muscle-skeletal) |              |         |              |         |              |  |
|---------------------------------------------------------------------|----------------------------|--------------|---------|--------------|---------|--------------|---------------------------------------------------|--------------|---------|--------------|---------|--------------|--|
|                                                                     | Model 1                    |              | Model 2 |              | Model 3 |              | Model 1                                           |              | Model 2 |              | Model 3 |              |  |
|                                                                     | $\beta$                    | CI95%        | $\beta$ | CI95%        | $\beta$ | CI95%        | $\beta$                                           | CI95%        | $\beta$ | CI95%        | $\beta$ | CI95%        |  |
| <b>Sex (ref: male)</b>                                              |                            |              |         |              |         |              |                                                   |              |         |              |         |              |  |
| Female                                                              | .024                       | .022; .026   | .024    | .022; .026   | .024    | .022; .026   | .038                                              | .036; .040   | .038    | .036; .040   | .038    | .036; .040   |  |
| <b>Age (in years)</b>                                               | .004                       | .004; .004   | .004    | .004; .004   | .004    | .004; .004   | .001                                              | .001; .001   | .001    | .001; .001   | .001    | .001; .001   |  |
| <b>Skin color* (ref: White)</b>                                     |                            |              |         |              |         |              |                                                   |              |         |              |         |              |  |
| Black                                                               | .007                       | -.003; .010  | .007    | .003; .010   | .007    | .003; .010   | -.009                                             | -.013; -.005 | -.009   | -.013; -.005 | -.009   | -.013; -.005 |  |
| Brown                                                               | .001                       | -.001; .004  | .002    | -.001; .004  | .002    | -.001; .004  | -.004                                             | -.006; -.001 | -.004   | -.006; -.001 | -.004   | -.006; -.001 |  |
| <b>Marital status (ref: Without partner)</b>                        |                            |              |         |              |         |              |                                                   |              |         |              |         |              |  |
| With partner                                                        | .000                       | -.002; .002  | .000    | -.002; .002  | .000    | -.002; .002  | -.005                                             | -.007; -.002 | -.005   | -.007; -.003 | -.005   | -.007; -.003 |  |
| <b>Schooling (in years)<sup>#</sup> (ref: <math>\geq 12</math>)</b> |                            |              |         |              |         |              |                                                   |              |         |              |         |              |  |
| 8-11                                                                | .013                       | .010; .016   | .013    | .010; .016   | .013    | .010; .016   | .004                                              | .001; .008   | .005    | .002; .008   | .005    | .002; .008   |  |
| 1-8                                                                 | .021                       | .018; .023   | .021    | .018; .023   | .021    | .018; .023   | .011                                              | .008; .014   | .011    | .008; .014   | .011    | .008; .014   |  |
| 0                                                                   | .014                       | .010; .017   | .014    | .010; .017   | .014    | .010; .017   | .001                                              | -.003; .004  | .001    | -.003; .005  | .001    | -.003; .005  |  |
| <b>Asset ownership (in quintiles) (ref: High)</b>                   |                            |              |         |              |         |              |                                                   |              |         |              |         |              |  |
| 2°                                                                  | .007                       | .004; .010   | .007    | .004; .010   | .007    | .004; .010   | .005                                              | .001; .008   | .005    | .001; .008   | .005    | .001; .008   |  |
| 3°                                                                  | .009                       | .006; .013   | .009    | .006; .013   | .009    | .006; .013   | .010                                              | .006; .014   | .010    | .006; .014   | .010    | .006; .014   |  |
| 4°                                                                  | .006                       | .002; .009   | .006    | .002; .009   | .006    | .002; .009   | .004                                              | .000; .008   | .004    | .000; .008   | .004    | .000; .008   |  |
| 5° (Low)                                                            | -.003                      | -.007; .001  | -.003   | -.007; .001  | -.003   | -.007; .001  | .001                                              | -.004; .005  | .001    | -.004; .005  | .001    | -.004; .005  |  |
| <b>Private health plan (ref: no)</b>                                |                            |              |         |              |         |              |                                                   |              |         |              |         |              |  |
| Yes                                                                 | .006                       | .004; .009   | .006    | .004; .009   | .006    | .004; .009   | .007                                              | .005; .010   | .007    | .005; .010   | .007    | .005; .010   |  |
| <b>Geographical area (ref: urban)</b>                               |                            |              |         |              |         |              |                                                   |              |         |              |         |              |  |
| Rural                                                               | -.008                      | -.011; -.005 | -.008   | -.011; -.005 | -.008   | -.011; -.005 | -.002                                             | -.005; .002  | -.002   | -.005; .002  | -.002   | -.005; .002  |  |
| <b>State-level education (ref: High)</b>                            |                            |              |         |              |         |              |                                                   |              |         |              |         |              |  |
| Middle                                                              |                            |              | -.010   | -.016; -.004 |         |              |                                                   |              | -.016   | -.027; -.005 |         |              |  |
| Low                                                                 |                            |              | -.008   | -.015; -.002 |         |              |                                                   |              | -.018   | -.029; -.006 |         |              |  |
| <b>State-level income (ref: High)</b>                               |                            |              |         |              |         |              |                                                   |              |         |              |         |              |  |
| Middle                                                              |                            |              |         |              | -.006   | -.012; .001  |                                                   |              |         |              | -.011   | -.022; .001  |  |
| Low                                                                 |                            |              |         |              | -.009   | -.016; -.003 |                                                   |              |         |              | -.017   | -.028; -.006 |  |

412

## STROBE Statement—checklist of items that should be included in reports of observational studies

|                              | Item No | Recommendation                                                                                                                                                                                                                                                                                                                                                                                                                                                         | Page |
|------------------------------|---------|------------------------------------------------------------------------------------------------------------------------------------------------------------------------------------------------------------------------------------------------------------------------------------------------------------------------------------------------------------------------------------------------------------------------------------------------------------------------|------|
| <b>Title and abstract</b>    | 1       | (a) Indicate the study's design with a commonly used term in the title or the abstract                                                                                                                                                                                                                                                                                                                                                                                 | 2    |
|                              |         | (b) Provide in the abstract an informative and balanced summary of what was done and what was found                                                                                                                                                                                                                                                                                                                                                                    | 2    |
| <b>Introduction</b>          |         |                                                                                                                                                                                                                                                                                                                                                                                                                                                                        |      |
| Background/rationale         | 2       | Explain the scientific background and rationale for the investigation being reported                                                                                                                                                                                                                                                                                                                                                                                   | 4    |
| Objectives                   | 3       | State specific objectives, including any prespecified hypotheses                                                                                                                                                                                                                                                                                                                                                                                                       | 4    |
| <b>Methods</b>               |         |                                                                                                                                                                                                                                                                                                                                                                                                                                                                        |      |
| Study design                 | 4       | Present key elements of study design early in the paper                                                                                                                                                                                                                                                                                                                                                                                                                | 5    |
| Setting                      | 5       | Describe the setting, locations, and relevant dates, including periods of recruitment, exposure, follow-up, and data collection                                                                                                                                                                                                                                                                                                                                        | 5    |
| Participants                 | 6       | (a) <i>Cohort study</i> —Give the eligibility criteria, and the sources and methods of selection of participants. Describe methods of follow-up<br><i>Case-control study</i> —Give the eligibility criteria, and the sources and methods of case ascertainment and control selection. Give the rationale for the choice of cases and controls<br><i>Cross-sectional study</i> —Give the eligibility criteria, and the sources and methods of selection of participants | 5    |
|                              |         | (b) <i>Cohort study</i> —For matched studies, give matching criteria and number of exposed and unexposed<br><i>Case-control study</i> —For matched studies, give matching criteria and the number of controls per case                                                                                                                                                                                                                                                 | -    |
| Variables                    | 7       | Clearly define all outcomes, exposures, predictors, potential confounders, and effect modifiers. Give diagnostic criteria, if applicable                                                                                                                                                                                                                                                                                                                               | 5-6  |
| Data sources/<br>measurement | 8*      | For each variable of interest, give sources of data and details of methods of assessment (measurement). Describe comparability of assessment methods if there is more than one group                                                                                                                                                                                                                                                                                   | 6    |
| Bias                         | 9       | Describe any efforts to address potential sources of bias                                                                                                                                                                                                                                                                                                                                                                                                              | 6    |
| Study size                   | 10      | Explain how the study size was arrived at                                                                                                                                                                                                                                                                                                                                                                                                                              | 5    |
| Quantitative variables       | 11      | Explain how quantitative variables were handled in the analyses. If applicable, describe which groupings were chosen and why                                                                                                                                                                                                                                                                                                                                           | 5-6  |
| Statistical methods          | 12      | (a) Describe all statistical methods, including those used to control for confounding                                                                                                                                                                                                                                                                                                                                                                                  | 6-7  |
|                              |         | (b) Describe any methods used to examine subgroups and interactions                                                                                                                                                                                                                                                                                                                                                                                                    | -    |
|                              |         | (c) Explain how missing data were addressed                                                                                                                                                                                                                                                                                                                                                                                                                            | -    |
|                              |         | (d) <i>Cohort study</i> —If applicable, explain how loss to follow-up was addressed<br><i>Case-control study</i> —If applicable, explain how matching of cases and controls was addressed<br><i>Cross-sectional study</i> —If applicable, describe analytical methods taking account of sampling strategy                                                                                                                                                              | 6    |
|                              |         | (e) Describe any sensitivity analyses                                                                                                                                                                                                                                                                                                                                                                                                                                  | -    |

| <b>Results</b>           |     |                                                                                                                                                                                                              |     |
|--------------------------|-----|--------------------------------------------------------------------------------------------------------------------------------------------------------------------------------------------------------------|-----|
| Participants             | 13* | (a) Report numbers of individuals at each stage of study—eg numbers potentially eligible, examined for eligibility, confirmed eligible, included in the study, completing follow-up, and analysed            | 8   |
|                          |     | (b) Give reasons for non-participation at each stage                                                                                                                                                         | -   |
|                          |     | (c) Consider use of a flow diagram                                                                                                                                                                           | -   |
| Descriptive data         | 14* | (a) Give characteristics of study participants (eg demographic, clinical, social) and information on exposures and potential confounders                                                                     | 8   |
|                          |     | (b) Indicate number of participants with missing data for each variable of interest                                                                                                                          | -   |
|                          |     | (c) <i>Cohort study</i> —Summarise follow-up time (eg, average and total amount)                                                                                                                             | -   |
| Outcome data             | 15* | <i>Cohort study</i> —Report numbers of outcome events or summary measures over time                                                                                                                          | -   |
|                          |     | <i>Case-control study</i> —Report numbers in each exposure category, or summary measures of exposure                                                                                                         | -   |
|                          |     | <i>Cross-sectional study</i> —Report numbers of outcome events or summary measures                                                                                                                           | 8   |
| Main results             | 16  | (a) Give unadjusted estimates and, if applicable, confounder-adjusted estimates and their precision (eg, 95% confidence interval). Make clear which confounders were adjusted for and why they were included | 8-9 |
|                          |     | (b) Report category boundaries when continuous variables were categorized                                                                                                                                    | 8-9 |
|                          |     | (c) If relevant, consider translating estimates of relative risk into absolute risk for a meaningful time period                                                                                             | -   |
| Other analyses           | 17  | Report other analyses done—eg analyses of subgroups and interactions, and sensitivity analyses                                                                                                               | -   |
| <b>Discussion</b>        |     |                                                                                                                                                                                                              |     |
| Key results              | 18  | Summarise key results with reference to study objectives                                                                                                                                                     | 11  |
| Limitations              | 19  | Discuss limitations of the study, taking into account sources of potential bias or imprecision. Discuss both direction and magnitude of any potential bias                                                   | 14  |
| Interpretation           | 20  | Give a cautious overall interpretation of results considering objectives, limitations, multiplicity of analyses, results from similar studies, and other relevant evidence                                   | 14  |
| Generalisability         | 21  | Discuss the generalisability (external validity) of the study results                                                                                                                                        | 14  |
| <b>Other information</b> |     |                                                                                                                                                                                                              |     |
| Funding                  | 22  | Give the source of funding and the role of the funders for the present study and, if applicable, for the original study on which the present article is based                                                | 15  |

\*Give information separately for cases and controls in case-control studies and, if applicable, for exposed and unexposed groups in cohort and cross-sectional studies.

**Note:** An Explanation and Elaboration article discusses each checklist item and gives methodological background and published examples of transparent reporting. The STROBE checklist is best used in conjunction with this article (freely available on the Web sites of PLoS Medicine at <http://www.plosmedicine.org/>, Annals of Internal Medicine at <http://www.annals.org/>, and Epidemiology at <http://www.epidem.com/>). Information on the STROBE Initiative is available at [www.strobe-statement.org](http://www.strobe-statement.org).

# BMJ Open

## Contextual and individual inequalities of multimorbidity in Brazilian adults: a cross-sectional national-based study

|                                 |                                                                                                                                                                                                                                                                                                                                                                                                                                                                                                                                                                                                                                                                                                                                                                                                                                                                                                                                                                                                                                                                 |
|---------------------------------|-----------------------------------------------------------------------------------------------------------------------------------------------------------------------------------------------------------------------------------------------------------------------------------------------------------------------------------------------------------------------------------------------------------------------------------------------------------------------------------------------------------------------------------------------------------------------------------------------------------------------------------------------------------------------------------------------------------------------------------------------------------------------------------------------------------------------------------------------------------------------------------------------------------------------------------------------------------------------------------------------------------------------------------------------------------------|
| Journal:                        | <i>BMJ Open</i>                                                                                                                                                                                                                                                                                                                                                                                                                                                                                                                                                                                                                                                                                                                                                                                                                                                                                                                                                                                                                                                 |
| Manuscript ID                   | bmjopen-2017-015885.R1                                                                                                                                                                                                                                                                                                                                                                                                                                                                                                                                                                                                                                                                                                                                                                                                                                                                                                                                                                                                                                          |
| Article Type:                   | Research                                                                                                                                                                                                                                                                                                                                                                                                                                                                                                                                                                                                                                                                                                                                                                                                                                                                                                                                                                                                                                                        |
| Date Submitted by the Author:   | 07-Apr-2017                                                                                                                                                                                                                                                                                                                                                                                                                                                                                                                                                                                                                                                                                                                                                                                                                                                                                                                                                                                                                                                     |
| Complete List of Authors:       | Nunes, BP; Universidade Federal de Pelotas, Department of Nursing<br>Chiavegatto Filho, Alexandre; Harvard School of Public Health, Society, Human Development and Health; Faculdade de Saúde Pública da Universidade de São Paulo, Departamento de Epidemiologia<br>Pati, Sanghamitra; Public Health Foundation of India, Indian Institute of Public Health Bhubaneswar; Sanghamitra Pati, Teixeira, Doralice; Secretaria Municipal da Saúde de São Paulo, São Paulo, Brasil<br>Flores, Thaynã; Federal University of Pelotas, Postgraduate Program of Epidemiology<br>Camargo-Figuera, Fabio Alberto; Universidad Industrial de Santander, School of Nursing<br>Munhoz, Tiago; Universidade Federal de Pelotas, Postgraduate Programme in Epidemiology<br>Thume, Elaine; Universidade Federal de Pelotas, Department of Nursing/Postgraduate Program of Nursing<br>Facchini, Luiz; Universidad Federal de Pelotas, Departamento de Medicina Social<br>Batista, Sandro Rogerio; Federal University of Goias, Department of Internal Medicine of Medical School |
| <b>Primary Subject Heading</b>: | Epidemiology                                                                                                                                                                                                                                                                                                                                                                                                                                                                                                                                                                                                                                                                                                                                                                                                                                                                                                                                                                                                                                                    |
| Secondary Subject Heading:      | Public health                                                                                                                                                                                                                                                                                                                                                                                                                                                                                                                                                                                                                                                                                                                                                                                                                                                                                                                                                                                                                                                   |
| Keywords:                       | Comorbidity, Multimorbidity, Chronic disease, Statistical disease clustering, Multilevel Analysis                                                                                                                                                                                                                                                                                                                                                                                                                                                                                                                                                                                                                                                                                                                                                                                                                                                                                                                                                               |
|                                 |                                                                                                                                                                                                                                                                                                                                                                                                                                                                                                                                                                                                                                                                                                                                                                                                                                                                                                                                                                                                                                                                 |

SCHOLARONE™  
Manuscripts

1  
2  
3  
4 **Title page**

5  
6 **Title:** Contextual and individual inequalities of multimorbidity in Brazilian adults: a cross-  
7  
8 sectional national-based study

9  
10 **Authors:** Bruno P Nunes<sup>1</sup>; Alexandre DP Chiavegatto-Filho<sup>2</sup>; Sanghamitra Pati<sup>3</sup>; Doralice S  
11 Cruz Teixeira<sup>4</sup>; Thaynã R Flores<sup>5</sup>; Fabio A Camargo-Figuera<sup>6</sup>; Tiago N Munhoz<sup>5</sup>; Elaine  
12 Thumé<sup>7</sup>; Luiz A Facchini<sup>5,7</sup>; Sandro R Batista Rodrigues<sup>8</sup>

13  
14  
15  
16 1 – Department of Nursing, Federal University of Pelotas, Brazil

17  
18 2 – Department of Epidemiology, School of Public Health, University of São Paulo,  
19 São Paulo, Brazil

20  
21 3 – Indian Institute of Public, Health, Bhubaneswar, Public Health Foundation of  
22 India, Bhubaneswar, Odisha, India

23  
24 4 – Municipal Health Department of São Paulo, São Paulo, Brasil.

25  
26 5 – Postgraduate Program in Epidemiology, Federal University of Pelotas, Pelotas,  
27 Brazil

28  
29 6 – School of Nursing, Universidad Industrial de Santander, Bucaramanga, Colombia.

30  
31 7 – Postgraduate Program in Nursing, Federal University of Pelotas, Pelotas, Brazil

32  
33 8 – Faculty of Medicine, Federal University of Goiás, Goiânia, Brazil

34  
35  
36  
37  
38  
39  
40  
41  
42 **Correspondence to:** Bruno P Nunes, Department of Nursing, Federal University of Pelotas,  
43  
44 Gomes Carneiro, 1, Phone: +5553 3284-3820, Pelotas-RS, Brazil. Email:  
45  
46 [nunesbp@gmail.com](mailto:nunesbp@gmail.com)

47  
48  
49 **Key-words:** Comorbidity; Multimorbidity; Chronic disease; Statistical disease clustering;  
50  
51  
52 Multilevel Analysis.

53  
54  
55 **Word count:** 3094

1  
2  
3  
4 25 **Abstract**

5  
6  
7 26 **Objectives:** The study aims to evaluate the magnitude of multimorbidity in Brazilian adults,  
8  
9 27 as well to measure their association with individual and contextual factors stratified by  
10  
11 28 Brazilian states and regions.

12  
13  
14 29 **Methods:** A national-based cross-sectional study was carried out in 2013 with Brazilian  
15  
16 30 adults. Multimorbidity was evaluated by a list of 22 physical and mental morbidities (based  
17  
18 31 on self-reported medical diagnosis and Patient Health Questionnaire 9 for depression). The  
19  
20 32 outcome was analyzed taking  $\geq 2$  and  $\geq 3$  diseases as cut-off points. Factor analysis (FA) was  
21  
22 33 used to identify disease patterns and multilevel models were used to test association with  
23  
24 34 individual and contextual variables.

25  
26  
27  
28 35 **Results:** The sample was comprised of 60,202 individuals. Multimorbidity frequency was  
29  
30 36 22.2% (CI95% 21.5; 22.9) for  $\geq 2$  morbidities and 10.2% (CI95% 9.7; 10.7) for  $\geq 3$   
31  
32 37 morbidities. In the multilevel adjusted models, females, older people, those living with a  
33  
34 38 partner and having less schooling presented more multiple diseases. No linear association was  
35  
36 39 found according to asset ownership but greater outcome frequency was found in individuals  
37  
38 40 with mid-range asset ownership quintiles. Living in states with higher levels of education and  
39  
40 41 wealthier states was associated with greater multimorbidity. Two patterns of morbidities  
41  
42 42 (cardiometabolic problems and Respiratory/mental/muscle-skeletal disorders) explained 92%  
43  
44 43 of total variance. The relationship of disease patterns with individual and contextual variables  
45  
46 44 was similar to the overall multimorbidity, with differences among Brazilian regions.

47  
48  
49  
50  
51 45 **Conclusions:** In Brazil, at least 19 million adults had multimorbidity. Frequency is similar to  
52  
53 46 that found in other LMIC. Contextual and individual social inequalities were observed.  
54  
55  
56  
57  
58  
59  
60

1  
2  
3  
4 47 **Strengths and limitations of this study**  
5  
6

- 7 48 • Comprehensive information about multimorbidity is still scarce in Brazil  
8  
9 49 • As far as we are aware, this is among the first information about multimorbidity  
10 assessment of individual and contextual factors in a sample representative of the  
11 whole of Brazil  
12  
13 50  
14  
15 51  
16 52 • Multimorbidity is a challenge to the Brazilian health system due to its high frequency  
17 (two in every ten adults had  $\geq 2$  diseases and one in every ten had  $\geq 3$  diseases,  
18 representing at least 19 million Brazilians) and the interplay of individual and  
19 contextual characteristics associated with the problem. Differences within the country  
20 were observed.  
21  
22 53  
23 54  
24 55  
25 56  
26  
27 57 • Except for depression, other morbidities were evaluated by self-reporting and we are  
28 not able to evaluate the contextual determinants at neighborhood level  
29  
30  
31  
32  
33  
34  
35  
36  
37  
38  
39  
40  
41  
42  
43  
44  
45  
46  
47  
48  
49  
50  
51  
52  
53  
54  
55  
56  
57  
58  
59  
60

## 59 **Introduction**

60 Multimorbidity is a current and worldwide public health problem mainly due to its high  
61 frequency (>60% in adults) and its association with negative outcomes [1-4]. Most evidence  
62 is from High Income Countries [4] but results from Low and Middle Income Countries  
63 (LMIC) are also available and increasing in the literature [5-8], including epidemiological  
64 information about multimorbidity in Brazilian cities [9-11].

65 Similar to international evidence, multimorbidity in Brazil is greater in females and increases  
66 according to age. Socioeconomic inequalities are also observed mainly related to educational  
67 differences whereas multiple disease is more frequent in adults and elderly with less  
68 schooling and lower socioeconomic status adults and elderly [10 11].

69 However, as far as we are aware, Brazilian evidence on multimorbidity for the entire country  
70 is scarce. Only recently, a paper evaluating epidemiology of multimorbidity in Brazil was  
71 published [12]. The authors found a 24.2% (95% CI 23.5–24.9) prevalence rate of  
72 multimorbidity [12] and correlates were similar to Brazilian located previous studies ([10  
73 11].

74 Brazil is the 5<sup>th</sup> most populous country in the world with more than 200 million people.  
75 Furthermore, it is marked by historic social inequalities in different health aspects comprising  
76 the occurrence of chronic diseases including both physical and mental disorders [13-15].

77 Understanding the occurrence and patterns of multimorbidity in the whole country can be  
78 relevant for Brazilian Unified Health System management of the challenges resulting from the  
79 rapid demographic and epidemiological transitions that have occurred in recent years.

80 Additionally, identifying and comprehending the contextual and individual differences



1  
2  
3  
4 81 surrounding multimorbidity occurrence helps policy-makers to prioritize and promote health  
5  
6 82 actions and interventions related to multimorbidity management.  
7  
8  
9 83 Thus, the aim of this study was to evaluate the frequency and patterns of multimorbidity in  
10  
11 84 Brazilian adults, as well to measure their association with individual and contextual factors  
12  
13  
14 85 stratified by Brazilian states and regions.  
15  
16  
17  
18  
19  
20  
21  
22  
23  
24  
25  
26  
27  
28  
29  
30  
31  
32  
33  
34  
35  
36  
37  
38  
39  
40  
41  
42  
43  
44  
45  
46  
47  
48  
49  
50  
51  
52  
53  
54  
55  
56  
57  
58  
59  
60

1  
2  
3  
4  
5  
6  
7  
8  
9  
10  
11  
12  
13  
14  
15  
16  
17  
18  
19  
20  
21  
22  
23  
24  
25  
26  
27  
28  
29  
30  
31  
32  
33  
34  
35  
36  
37  
38  
39  
40  
41  
42  
43  
44  
45  
46  
47  
48  
49  
50  
51  
52  
53  
54  
55  
56  
57  
58  
59  
60**86 Methods**

87 This was a cross-sectional study using population-based data from the Brazilian National  
88 Health Survey (*Pesquisa Nacional de Saúde - PNS*) carried out in Brazil in 2013. The survey  
89 was conducted by *Instituto Brasileiro de Geografia e Estatística (IBGE)* and the Ministry of  
90 Health. The sample is representative of people living in permanent housing, located in urban  
91 or rural areas, covering the country's five major geographical regions, its 26 states and  
92 Federal District.

93 Sampling was done in three stages, the first being the selection of census tracts, followed by  
94 households and, finally, individuals aged 18 or over. More details about the sampling process  
95 can be found elsewhere[16 17].

96 Multimorbidity was evaluated by using a list of all 22 self-reported morbidities available in  
97 the study, 21 of which were based on self-reported medical diagnosis, while depression was  
98 based on the Patient Health Questionnaire-9(PHQ-9)[18]. The question applied to measure  
99 each disease based on self-reported medical diagnosis was: "*Has any physician already*  
100 *diagnosed you as having [each disease]?*". The following morbidities were included: High  
101 Blood Pressure - HBP; Spinal column problem; Hypercholesterolemia; Depression; Diabetes;  
102 Arthritis/rheumatism; Asthma/wheezy bronchitis; Work-related muscle-skeletal disorders;  
103 Cancer; Other heart disease; Stroke; Kidney problem; Heart attack; Heart failure; Bronchitis;  
104 Angina; Emphysema; Other lung disease; Bipolar disorder; Other mental disease;  
105 Schizophrenia; and Obsessive Compulsive Disorder (OCD). Multimorbidity was evaluated by  
106 two cut-off points as per the literature[4 19]:  $\geq 2$  and  $\geq 3$  morbidities. Women who had HBP or  
107 diabetes only during pregnancy were considered as not having these diseases.

1  
2  
3  
4 108 Independent variables were sex (male; female), age (continuous), skin color (white; black;  
5  
6 109 and brown - Asian-Brazilian and indigenous were not shown because they represented less  
7  
8 110 than 1.6% of the sample), marital status (without partner; with partner), schooling in years (0:  
9  
10 111 No schooling; 1-8: incomplete primary school; 8-11: complete primary school and incomplete  
11  
12 112 secondary school; ≥12: complete secondary school up to complete higher education), wealth  
13  
14 113 index in quintiles (based on ownership of bathroom, car, motorcycle, refrigerator, washing  
15  
16 114 machine, DVD player, TV, landline telephone, microcomputer and microwave oven), private  
17  
18 115 health plan (no; yes), geographical area (urban; rural); state-level education in terciles –  
19  
20 116 proportion of literacy rate obtained from IBGE, 2010 and state-level income in terciles  
21  
22 117 (nominal income per capita - average monthly value - in permanent private housing obtained  
23  
24 118 from IBGE, 2010).

25  
26  
27  
28  
29 119 Statistical analyses were performed using Stata 12.1 software and the *svy* command was used,  
30  
31 120 which takes into consideration sample weights. Sample weights were defined for the primary  
32  
33 121 sampling units, households and all inhabitants, as well as for the selected inhabitant.

34  
35  
36 122 Complete information about PNS sample weights and sampling process have been published  
37  
38 123 elsewhere [16 17]. The results from the sample were expanded for the Brazilian population.

39  
40  
41 124 Descriptive analysis was based on the calculation of prevalence and its respective confidence  
42  
43 125 intervals. Factor analysis (FA) was performed to identify patterns of morbidities[20]. This  
44  
45 126 analysis was based on tetrachoric correlation, this being more appropriate than Pearson's  
46  
47 127 correlation for dichotomous variables [21]. Before FA analysis, Kaiser-Meyer-Olkin (KMO)  
48  
49 128 and Bartlett sphericity tests were used to evaluate the applicability of this approach. After the  
50  
51 129 first evaluation of the model, some variables were encompassed (bronchitis, emphysema and  
52  
53 130 other lung disease to other respiratory problems - COPD) and others excluded (schizophrenia,  
54  
55 131 Obsessive Compulsive Disorder, another mental disease and another heart disease) in order to  
56  
57  
58  
59  
60

1  
2  
3  
4 132 obtain a better model fit regarding KMO and Bartlett sphericity tests. Oblique (oblimin or  
5  
6 133 promax) rotation was performed. In order to establish the number of components to be  
7  
8 134 retained, we used Cattell graphics, Kaiser criteria (eigenvalue>1) and minimum explained  
9  
10 135 variance (>10% for each component). Variables with loadings  $\geq 0.3$  were kept [22]. Through  
11  
12 136 factorial analysis, we obtained the predicted scores of morbidities (factors).

13  
14  
15  
16 137 Multilevel models were performed to account for state-level variance, with the individuals as  
17  
18 138 the first level and the state of residence as the second level. First, the models were initially  
19  
20 139 adjusted without inclusion of the independent variables (null model) to test the initial variance  
21  
22 140 attributable to the state accounting for approximately 1% ( $p < 0.05$ ) of variance for the four  
23  
24 141 analyses (Multimorbidity  $\geq 2$ ; Multimorbidity  $\geq 3$ , factor 1 and factor 2). Then, we performed a  
25  
26 142 logistic regression model for multimorbidity ( $\geq 2$  and  $\geq 3$  morbidities) and linear regression  
27  
28 143 models to evaluate the association of factors (patterns) of diseases and independent variables.  
29  
30 144 We included sex, age, skin color, marital status, schooling in years, private health plan,  
31  
32 145 geographical area, state-level education and income in these models. Stratified region-level  
33  
34 146 analyzes were performed to better understanding disparities among states.

35  
36  
37  
38  
39 147 The study was approved by the National Research Ethics Commission on July 8, 2013, under  
40  
41 148 No. 10853812.7.0000.0008. All respondents signed a free and informed consent statement  
42  
43 149 form prior to data collection  
44  
45  
46  
47  
48  
49  
50  
51  
52  
53  
54  
55  
56  
57  
58  
59  
60

1  
2  
3  
4 150 **Results**

5  
6  
7 151 The sample was comprised of 60,202 adults. The most frequent diseases were High Blood  
8  
9 152 Pressure (22.3%) and Spinal column problem (19.0%). Angina, emphysema, other lung  
10  
11 153 disease, bipolar disorder, other mental disease, schizophrenia and Obsessive Compulsive  
12  
13 154 Disorder (OCD) were present in less than 1% of the sample. Lung disease problems showed,  
14  
15 155 on average, longer duration of disease. Greater comorbidities were observed for individuals  
16  
17 156 with health problems (heart attack; heart failure and angina). The mean range of comorbidities  
18  
19 157 was from 2.3 to 4.5 diseases (Supplementary table 1).

20  
21  
22  
23 158 Females comprised 55.1% of the sample and mean age was 43.7 years (SD=17.0), ranging  
24  
25 159 from 18 to 101. Most individuals reported white skin color (47.8%) followed by brown  
26  
27 160 (41.7%). Almost two thirds lived with a partner. Out of the total sample, 45.2% had  $\geq 12$  years  
28  
29 161 of schooling and 13.9% had zero schooling. Less than one third had a private health plan and  
30  
31 162 13.5% lived in rural areas (Table 1). The mean average proportion of literacy rate at the state-  
32  
33 163 level was 7.3%, ranging from 3.3% to 22.5%. The average monthly value of nominal income  
34  
35 164 per capita was R\$ 1,069 (approximately US\$ 644 in 2010).

36  
37  
38  
39 165 The occurrence of multimorbidity was 22.2% (CI95% 21.5; 22.9) for  $\geq 2$  morbidities and  
40  
41 166 10.2% (CI95% 9.7; 10.7) for  $\geq 3$  morbidities. Irrespective of cut-off point, multimorbidity was  
42  
43 167 higher in females, older people, individuals reporting white skin color, who lived with a  
44  
45 168 partner, had less schooling, had a private health plan and living in urban areas. At state-level,  
46  
47 169 multimorbidity was more frequent in states with higher education levels and wealthier states  
48  
49 170 (Table 1). States in the South of Brazil showed the highest occurrence of multimorbidity  
50  
51 171 (Supplementary figure 1),  
52  
53  
54  
55  
56  
57  
58  
59  
60

1  
2  
3  
4 172 In the adjusted multilevel models, females had 1.86 (CI95% 1.78; 1.95) and 1.97(CI95%  
5  
6 173 1.85; 2.10) more odds of multimorbidity than males, for  $\geq 2$  and  $\geq 3$  morbidities, respectively.  
7  
8 174 In all cases, every additional year of age increased by 1.06 times the odds of multiples  
9  
10 175 diseases. Self-reported skin color was not associated with multimorbidity in the adjusted  
11  
12 176 models. On average, living with a partner increased by 1.15 times the odds of the outcome.  
13  
14 177 Compared to individuals with  $\geq 12$  years of schooling, adults with 1-8 years of schooling had  
15  
16 178 more odds of multimorbidity (OR 1.40 - CI95% 1.32; 1.49, for  $\geq 2$  diseases and OR 1.58  
17  
18 179 CI95% 1.45; 1.72, for  $\geq 3$  morbidities). In general, adults in the second and third wealthiest  
19  
20 180 quintiles had greater odds of multimorbidity. Individuals with private health plans and who  
21  
22 181 lived in urban areas had greater odds of multiple diseases. Individuals who lived in states with  
23  
24 182 low and middle education levels had less multimorbidity compared to states with high  
25  
26 183 education levels. With regard to income at state-level, the higher multimorbidity difference  
27  
28 184 was demonstrated simply by comparing low with high income states (Table 2). The  
29  
30 185 associations stratified by region revealed a similar pattern to the whole Brazil, except to  
31  
32 186 Central Western region in relation to lack of association of overall multimorbidity and private  
33  
34 187 health plan, geographical area (observed to Southeastern region too) and schooling (no dose-  
35  
36 188 response relationship) (Table 3).  
37  
38  
39  
40  
41  
42 189 In the FA analysis, the KMO coefficient was 0.84. Two patterns of morbidities explained  
43  
44 190 92% of total variance, after rotation. The two components identified were: (1)  
45  
46 191 cardiometabolic problems (High Blood Pressure, heart attack, angina, heart failure, stroke,  
47  
48 192 hypercholesterolemia, diabetes and arthritis/rheumatism); (2) Respiratory/mental/muscle-  
49  
50 193 skeletal disorders (arthritis/rheumatism, spinal column problem, asthma/wheezy bronchitis,  
51  
52 194 COPD, work-related muscle-skeletal disorders, depression, bipolar disorder and kidney  
53  
54 195 problem) (Supplementary table 2).  
55  
56  
57  
58  
59  
60

1  
2  
3  
4 196 The adjusted multilevel analyses of the two factors are presented in Table 4. Overall, the  
5  
6 197 results were similar to those observed in Table 2. Females, older people, those with less  
7  
8 198 schooling, those with intermediate asset ownership quintiles and who had private health plans  
9  
10 199 showed more burden of factors. People who lived in rural geographical areas showed less  
11  
12 200 burden of the cardiometabolic factor. Individuals with partners presented less burden of the  
13  
14 201 Respiratory/mental/muscle-skeletal factor compared to individuals who did not have a  
15  
16 202 partner. Cardiometabolic and Respiratory/mental/muscle-skeletal factors were greater when  
17  
18 203 state-level education and income were lower. The cardiometabolic factor presented similar  
19  
20 204 associations as overall multimorbidity to stratified analysis. As for the Respiratory/mental/  
21  
22 205 muscle-skeletal factor did not show association with schooling in all regions (except to  
23  
24 206 Northern) (Table 5).  
25  
26  
27  
28  
29  
30  
31  
32  
33  
34  
35  
36  
37  
38  
39  
40  
41  
42  
43  
44  
45  
46  
47  
48  
49  
50  
51  
52  
53  
54  
55  
56  
57  
58  
59  
60

1  
2  
3  
4 208 **Discussion**  
5

6  
7 209 Multimorbidity frequency in Brazil is considerable; one in every five Brazilian adults had two  
8  
9 210 or more morbidities and one in every ten had three or more morbidities. Individual and state-  
10  
11 211 level inequalities suggest the complexity of factors and their relationship with multimorbidity  
12  
13 212 occurrence. To our knowledge, this is the first representative Brazilian study to consider  
14  
15 213 individual and contextual factors associated with multimorbidity and its clusters.  
16  
17

18  
19 214 The study's national representativeness enables us to extrapolate frequencies for the whole  
20  
21 215 Brazilian adult population. Considering 190,755,799 million adults in the most recent  
22  
23 216 Brazilian population census (2010), we are able to infer that approximately 42.7 and 19.5  
24  
25 217 million Brazilian adults had two or more and three or more diseases, respectively. These  
26  
27 218 results bring important challenges for the health system which will need to be more  
28  
29 219 comprehensive in order to deal with the complexity of multimorbidity. Some of the issues are  
30  
31 220 related to need to include multimorbidity in guidelines on reporting these problems to health  
32  
33 221 professionals, as well as giving more emphasis to multimorbidity on health-related university  
34  
35 222 curricula.  
36  
37

38  
39 223 Relative comparisons with Western countries reveal similar occurrence of two or more  
40  
41 224 diseases in Spain [23] (20.0%; CI95%: 18.8-21.2) and almost ten percentage points less than  
42  
43 225 in Scotland [24] (31.1%, 25 or more years) and Canada[25] (30.9%; CI95% 29.5 – 32.4).In  
44  
45 226 low and middle income countries (LMIC), estimates from countries (China, Ghana, India,  
46  
47 227 Mexico, Russia, and South Africa) included in the WHO Study on global AGEing and adult  
48  
49 228 health (SAGE) Wave-1 (2007/10), found 21.9% (CI95%: 20.9; 22.9) of multimorbidity  
50  
51 229 occurrence ( $\geq 2$  diseases from a list from eight morbidities)[5]. This occurrence varied from  
52  
53 230 20.3% in China to 34.7% in Russia. In the present analysis, we used more diseases to  
54  
55  
56  
57  
58  
59  
60



1  
2  
3  
4 231 construct multimorbidity (22 against eight in SAGE study). Even so, the prevalence found  
5  
6 232 was, virtually, equal to these other LMIC countries, except for Russia.  
7  
8  
9 233 In Brazil, our occurrence findings were slightly lower than the result found in a paper with  
10  
11 234 same database (-2 pp). This is explained by the differences among diseases selected to  
12  
13 235 measure multimorbidity and present an urgent call to more uniform multimorbidity  
14  
15 236 operationalization. Comparing with located Brazilian results, the prevalences presented here  
16  
17 237 were lower than frequencies found in a Southern Brazilian city (29.1%; CI95%: 27.1; 31.1 for  
18  
19 238  $\geq 2$  morbidities, and 14.3 %; CI95%: 12.8; 15.8 for  $\geq 3$  morbidities) despite the higher number  
20  
21 239 of morbidities included in this study [10]. The difference observed may be attributed to  
22  
23 240 socioeconomic characteristics of Brazilian states. The Southern states presented more income  
24  
25 241 and schooling which tend to increase the occurrence of multimorbidity as observed in the  
26  
27 242 results presented here.  
28  
29  
30  
31  
32 243 In terms of socio-demographic characteristics, females and older adults presented more  
33  
34 244 multimorbidity in all Brazilian regions as found in previous Brazilian [10 11] and  
35  
36 245 international studies [26 27]. Women tend to use health services more and to live longer than  
37  
38 246 males, these being factors which explain part of the higher frequency in this group. Survivors  
39  
40 247 older adults tend to be exposed to more physiological damages in lifetime that contribute to  
41  
42 248 chronic disease incidence [28]. In the same way, individuals who had partners had higher  
43  
44 249 multimorbidity except to Central Western residents. The association between marital status  
45  
46 250 should be more understanding through studies which include cultural assessment and its  
47  
48 251 impact on chronic diseases development and diagnosis. One explanation is related to the fact  
49  
50 252 that individuals with partner tend to use more health services increasing the probability of  
51  
52 253 medical diagnosis [29].  
53  
54  
55  
56  
57  
58  
59  
60

1  
2  
3  
4 254 Regarding socioeconomic variables, our results follow the pattern found in overall analysis of  
5  
6 255 a worldwide study [27] and LMIC included in the SAGE study. Multimorbidity and its factors  
7  
8 256 was not associated with wealth quintiles but presented association with education [5]  
9  
10  
11 257 regardless Brazilian regions. In the present analysis, the middle wealth quintile strata and their  
12  
13 258 clusters present more multimorbidity whilst showing a negative dose-response relationship  
14  
15 259 with education. These results may be explained by a strong relationship between educational  
16  
17 260 attainment and all aspects of healthier life including those mainly related to better awareness  
18  
19 261 of chronic disease risk factors [30 31]. Education level seems to be a more adequate  
20  
21 262 socioeconomic indicator to evaluate multimorbidity inequalities due to its worldwide  
22  
23 263 association with poor health outcomes and longevity, and the persistent effect overtime [30].  
24  
25 264 Except for the early effect of childhood health status on education [32 33], chronic diseases in  
26  
27 265 adult life tend to increase the risk of poverty (wealth index) [34] but the effect on education  
28  
29 266 tend to be less relevant since education is usually achieved is early life  
30  
31  
32  
33 267 Having private health plans was associated with multimorbidity and its factors, except to  
34  
35 268 Central Western and Southern. This may be explained, by the relationship with self-reported  
36  
37 269 diagnosis (a fundamental characteristic of the outcome). Individuals with health plans tend to  
38  
39 270 use health services more frequently regardless the presence of chronic conditions[35 36] thus  
40  
41 271 affording more diagnosis.  
42  
43  
44  
45 272 Individuals who lived in urban areas presented more multiple diseases. This was similar to  
46  
47 273 results found in the adult population in South Africa [37] and Catalonia (Spain)[38]. In spite  
48  
49 274 of little Brazilian evidence on the topic, as well as the social, cultural and environment  
50  
51 275 differences between rural-urban residents, people from rural areas had more difficulty in  
52  
53 276 accessing health services in Brazil [39] which may explain partially the differences between  
54  
55  
56  
57  
58  
59  
60

1  
2  
3  
4 277 rural and urban residents in our results of the occurrence of self-reported medical diagnosis of  
5  
6 278 multiple diseases.  
7  
8

9 279 The state-level differences observed reveal a paradoxical association. Instead of individual  
10  
11 280 inequalities are pro-rich, state-level differences are pro-poor. These results might be explained  
12  
13 281 by demographic differences between states in Brazil which may not be fully adjusted with  
14  
15 282 individual demographic variables included in the analysis. Low income and low education in  
16  
17 283 Brazilian states are concentrated in North and Northeast regions and show the poorest health-  
18  
19 284 related indicators[13]. The states further south (*Rio Grande do Sul* - 27.2% and *Santa*  
20  
21 285 *Catarina* - 27.1%) present greater multimorbidity frequencies.  
22  
23  
24

25 286 The two factors (cardiometabolic and respiratory/mental/muscle-skeletal) found have some  
26  
27 287 similarity to recent evidence [40 41] mainly related to cardiometabolic patterns. The  
28  
29 288 respiratory/mental/muscle-skeletal data found was similar to results found in a worldwide  
30  
31 289 study of people aged 50 or over [42]. The majority of studies, especially with adult  
32  
33 290 populations, found two or three patterns of diseases. These combinations of diseases suggest  
34  
35 291 possible causal relationship between diseases or their risk factors [20]. The cardiometabolic  
36  
37 292 pattern showed a more well know relationship between diseases. On the other hand, the  
38  
39 293 relationship between respiratory, mental and muscle-skeletal disorders is less understood. The  
40  
41 294 concomitant occurrence of these diseases is well described [43] but understanding the  
42  
43 295 biological plausibility of causal relationships will be a challenge for new studies. As a first  
44  
45 296 step, more detailed and specific information about onset of diseases will be needed. At the  
46  
47 297 same time, the use of approaches related to network analysis can be useful for a better  
48  
49 298 understanding of causal relationships [44]. Even so, the results presented here may contribute  
50  
51 299 to the inclusion of recommendations in Brazilian clinical guidelines about the relationship  
52  
53  
54  
55  
56  
57  
58  
59  
60

1  
2  
3  
4 300 with chronic conditions, as well as to designing interventions/public policies considering the  
5  
6 301 presence of multiple diseases in the same individual.  
7  
8

9 302 Some limitations of the study should be addressed. With the exception of depression, all the  
10  
11 303 other morbidities were evaluated by self-reporting. This may provide a misclassification bias  
12  
13 304 even though self-reported diagnosis is considered an adequate and common source of  
14  
15 305 information used in population-based studies on multimorbidity [4 45 46]. Nevertheless, the  
16  
17 306 lack of adequate information about diagnosis, including longitudinal information, limits the  
18  
19 307 causal inference related to concomitant diseases expressed in factorial analysis. Furthermore,  
20  
21 308 we are not able to evaluate the contextual determinants at neighborhood level which may  
22  
23 309 produce more complete associations with state-level differences.  
24  
25  
26

27 310 The absolute and relative number of Brazilian individuals with multimorbidity was high.  
28  
29 311 Addressing the complexity of multiple disease management for at least 19 million people will  
30  
31 312 be a challenge for the health system. The clusters of diseases identified might contribute to  
32  
33 313 strategies for the prevention and clinical care of these diseases. State-level and individual  
34  
35 314 inequalities increase the problem reinforcing the need of a wide lens to organize health  
36  
37 315 services and to decrease the inequities among the Brazilian population.  
38  
39  
40  
41  
42  
43  
44  
45  
46  
47  
48  
49  
50  
51  
52  
53  
54  
55  
56  
57  
58  
59  
60

1  
2  
3  
4 316 **Author contributions**

5  
6 317 BPN designed the article, obtained and analyzes the data, drafted the first version and revised  
7  
8 318 the manuscript. ADPCF and FACF analyzed the data, and drafted and revised the manuscript.  
9  
10 319 SP, DS, TRF, TNM, ET and LAF drafted and revised the manuscript. SBR designed the  
11  
12 320 article, drafted and revised the manuscript. All authors approved the final version of the  
13  
14 321 manuscript.

15 322 **Funding:** There are no funding related to the production of the paper. The Brazilian Ministry  
16  
17 323 of Health financed the PNS survey. The funder of the survey played no role in the study  
18  
19 324 design; collection, analysis, and interpretation of data; writing of the report; or the decision to  
20  
21 325 submit the article for publication.

22 326 **Conflict of interest:** All authors have no potential conflicts.

23  
24 327 **Data sharing statement:** All PNS data are available from the Brazilian Institute of  
25  
26 328 Geography and Statistics website, located here:  
27  
28 329 [http://www.ibge.gov.br/home/estatistica/populacao/pns/2013/default\\_microdados.shtm](http://www.ibge.gov.br/home/estatistica/populacao/pns/2013/default_microdados.shtm).

29  
30  
31  
32  
33  
34  
35  
36  
37  
38  
39  
40  
41  
42  
43  
44  
45  
46  
47  
48  
49  
50  
51  
52  
53  
54  
55  
56  
57  
58  
59  
60 330

331 **References**

- 332 1. Ryan A, Wallace E, O'Hara P, et al. Multimorbidity and functional decline in community-dwelling  
333 adults: a systematic review. *Health and quality of life outcomes* 2015;**13**(1):1-13 doi:  
334 10.1186/s12955-015-0355-9[published Online First: Epub Date]].
- 335 2. Fortin M, Lapointe L, Hudon C, et al. Multimorbidity and quality of life in primary care: a systematic  
336 review. *Health and quality of life outcomes* 2004;**2**:51 doi: 10.1186/1477-7525-2-  
337 51[published Online First: Epub Date]].
- 338 3. Nunes BP, Flores TR, Mielke GI, et al. Multimorbidity and mortality in older adults: A systematic  
339 review and meta-analysis. *Arch Gerontol Geriatr* 2016;**67**:130-38 doi:  
340 10.1016/j.archger.2016.07.008[published Online First: Epub Date]].
- 341 4. Fortin M, Stewart M, Poitras ME, et al. A systematic review of prevalence studies on  
342 multimorbidity: toward a more uniform methodology. *Annals of family medicine*  
343 2012;**10**(2):142-51 doi: 10.1370/afm.1337[published Online First: Epub Date]].
- 344 5. Arokiasamy P, Uttamacharya U, Jain K, et al. The impact of multimorbidity on adult physical and  
345 mental health in low- and middle-income countries: what does the study on global ageing  
346 and adult health (SAGE) reveal? *BMC Med* 2015;**13**:178 doi: 10.1370/afm.1843  
347 10.1186/s12916-015-0402-8[published Online First: Epub Date]].
- 348 6. Pati S, Agrawal S, Swain S, et al. Non communicable disease multimorbidity and associated health  
349 care utilization and expenditures in India: cross-sectional study. *BMC health services research*  
350 2014;**14**:451 doi: 10.1186/1472-6963-14-451[published Online First: Epub Date]].
- 351 7. Pati S, Swain S, Hussain MA, et al. Prevalence, correlates, and outcomes of multimorbidity among  
352 patients attending primary care in Odisha, India. *BMJ Open* 2015;**13**(5):446-50 doi:  
353 10.1136/bmjopen-2014-007235  
354 10.1370/afm.1843[published Online First: Epub Date]].
- 355 8. Pati S, Swain S, Hussain MA, et al. Prevalence and outcomes of multimorbidity in South Asia: a  
356 systematic review. 2015;**5**(10):e007235 doi: 10.1136/bmjopen-2014-007235[published  
357 Online First: Epub Date]].
- 358 9. Andrade LH, Bensenor IM, Viana MC, et al. Clustering of psychiatric and somatic illnesses in the  
359 general population: multimorbidity and socioeconomic correlates. *Braz J Med Biol Res*  
360 2010;**43** doi: 10.1590/s0100-879x2010007500024[published Online First: Epub Date]].
- 361 10. Nunes BP, Camargo-Figuera FA, Guttier M, et al. Multimorbidity in adults from a southern  
362 Brazilian city: occurrence and patterns. *International journal of public health* 2016 doi:  
363 10.1007/s00038-016-0819-7[published Online First: Epub Date]].
- 364 11. Nunes BP, Thume E, Facchini LA. Multimorbidity in older adults: magnitude and challenges for the  
365 Brazilian health system. *BMC Public Health* 2015;**15**:1172 doi: 10.1186/s12889-015-2505-  
366 8[published Online First: Epub Date]].
- 367 12. Rzewuska M, de Azevedo-Marques JM, Coxon D, et al. Epidemiology of multimorbidity within the  
368 Brazilian adult general population: Evidence from the 2013 National Health Survey (PNS  
369 2013). *PLOS ONE* 2017;**12**(2):e0171813 doi: 10.1371/journal.pone.0171813[published Online  
370 First: Epub Date]].
- 371 13. Paim J, Travassos C, Almeida C, et al. The Brazilian health system: history, advances, and  
372 challenges. *The Lancet* 2011;**377**(9779):1778-97 doi: 10.1016/S0140-6736(11)60054-  
373 8[published Online First: Epub Date]].
- 374 14. Schmidt MI, Duncan BB, Azevedo e Silva G, et al. Chronic non-communicable diseases in Brazil:  
375 burden and current challenges. *Lancet* 2011;**377** doi: 10.1016/s0140-6736(11)60135-  
376 9[published Online First: Epub Date]].

- 1  
2  
3  
4 377 15. Andrade LH, Wang Y-P, Andreoni S, et al. Mental Disorders in Megacities: Findings from the São  
5 378 Paulo Megacity Mental Health Survey, Brazil. *PLoS ONE* 2012;**7**(2):e31879 doi:  
6 379 10.1371/journal.pone.0031879[published Online First: Epub Date]].  
7 380 16. Damacena GN, Szwarzwald CL, Malta DC, et al. The Development of the National Health Survey in  
8 381 Brazil, 2013. *Epidemiologia e Serviços de Saúde* 2015;**24**:197-206  
9 382 17. Souza-Júnior PRBd, Freitas MPSd, Antonaci GdA, et al. Sampling Design for the National Health  
10 383 Survey, 2013. *Epidemiologia e Serviços de Saúde* 2015;**24**:207-16  
11 384 18. Santos IS, Tavares BF, Munhoz TN, et al. Sensibilidade e especificidade do Patient Health  
12 385 Questionnaire-9 (PHQ-9) entre adultos da população geral. *Cadernos de Saúde Pública*  
13 386 2013;**29**:1533-43  
14 387 19. Harrison C, Britt H, Miller G, et al. Examining different measures of multimorbidity, using a large  
15 388 prospective cross-sectional study in Australian general practice. *BMJ Open* 2014;**4**(7) doi:  
16 389 10.1136/bmjopen-2013-004694[published Online First: Epub Date]].  
17 390 20. Schäfer I, von Leitner E-C, Schön G, et al. Multimorbidity Patterns in the Elderly: A New Approach  
18 391 of Disease Clustering Identifies Complex Interrelations between Chronic Conditions. *PLoS*  
19 392 *ONE* 2010;**5**(12):e15941 doi: 10.1371/journal.pone.0015941[published Online First: Epub  
20 393 Date]].  
21 394 21. Kubinger K. On artificial results due to using factor analysis for dichotomous variables. *Psychology*  
22 395 *Science* 2003;**45**(106-10)  
23 396 22. Norman G, Streiner D. Principal Components and Factor Analysis. *Fooling Around with Factors.*  
24 397 *Biostatistics: the bare essentials.* 3 ed. Hamilton: Bc Decker, 2008.  
25 398 23. Garin N, Olaya B, Perales J, et al. Multimorbidity patterns in a national representative sample of  
26 399 the Spanish adult population. *PLoS One* 2014;**9**(1):e84794 doi:  
27 400 10.1371/journal.pone.0084794[published Online First: Epub Date]].  
28 401 24. Barnett K, Mercer SW, Norbury M, et al. Epidemiology of multimorbidity and implications for  
29 402 health care, research, and medical education: a cross-sectional study. *Lancet*  
30 403 2012;**380**(9836):37-43 doi: 10.1016/s0140-6736(12)60240-2[published Online First: Epub  
31 404 Date]].  
32 405 25. Agborsangaya CB, Ngwakongwi E, Lahtinen M, et al. Multimorbidity prevalence in the general  
33 406 population: the role of obesity in chronic disease clustering. *BMC Public Health* 2013;**13**:1161  
34 407 doi: 10.1186/1471-2458-13-1161[published Online First: Epub Date]].  
35 408 26. Violan C, Foguet-Boreu Q, Flores-Mateo G, et al. Prevalence, determinants and patterns of  
36 409 multimorbidity in primary care: a systematic review of observational studies. *PLoS One*  
37 410 2014;**9** doi: 10.1371/journal.pone.0102149[published Online First: Epub Date]].  
38 411 27. Afshar S, Roderick PJ, Kowal P, et al. Multimorbidity and the inequalities of global ageing: a cross-  
39 412 sectional study of 28 countries using the World Health Surveys. *BMC Public Health*  
40 413 2015;**15**(1):1-10 doi: 10.1186/s12889-015-2008-7[published Online First: Epub Date]].  
41 414 28. Salive ME. Multimorbidity in Older Adults. *Epidemiologic reviews* 2013 doi:  
42 415 10.1093/epirev/mxs009[published Online First: Epub Date]].  
43 416 29. Mendoza-Sassi R, Béria JU. Health services utilization: a systematic review of related factors. *Cad*  
44 417 *Saude Publica* 2001;**17**:819-32 doi: 10.1590/S0102-311X2001000400016[published Online  
45 418 First: Epub Date]].  
46 419 30. Montez JK, Friedman EM. Educational attainment and adult health: Under what conditions is the  
47 420 association causal? *Social Science & Medicine* 2015;**127**:1-7 doi:  
48 421 <http://dx.doi.org/10.1016/j.socscimed.2014.12.029>[published Online First: Epub Date]].  
49 422 31. CSDH. Closing the gap in a generation: health equity through action on the social determinants of  
50 423 health. Final Report of the Commission on Social Determinants of Health. Geneva: World  
51 424 Health Organization, 2008.

- 1  
2  
3  
4 425 32. Haas SA, Glymour MM, Berkman LF. Childhood health and labor market inequality over the life  
5 426 course. *Journal of health and social behavior* 2011;**52**(3):298-313 doi:  
6 427 10.1177/0022146511410431[published Online First: Epub Date]].
- 7 428 33. Case A, Fertig A, Paxson C. The lasting impact of childhood health and circumstance. *Journal of*  
8 429 *Health Economics* 2005;**24**(2):365-89 doi:  
9 430 <http://dx.doi.org/10.1016/j.jhealeco.2004.09.008>[published Online First: Epub Date]].
- 10 431 34. Callander EJ, Schofield DJ. The risk of falling into poverty after developing heart disease: a survival  
11 432 analysis. *BMC Public Health* 2016;**16**(1):570 doi: 10.1186/s12889-016-3240-5[published  
12 433 Online First: Epub Date]].
- 13 434 35. Skinner EH, Foster M, Mitchell G, et al. Effect of health insurance on the utilisation of allied health  
14 435 services by people with chronic disease: a systematic review and meta-analysis. *Australian*  
15 436 *Journal of Primary Health* 2014;**20**(1):9-19 doi: <http://dx.doi.org/10.1071/PY13092>[published  
16 437 Online First: Epub Date]].
- 17 438 36. Chung RY, Mercer SW, Yip BH, et al. The association between types of regular primary care and  
18 439 hospitalization among people with and without multimorbidity: A household survey on  
19 440 25,780 Chinese. *Scientific reports* 2016;**6**:29758 doi: 10.1038/srep29758[published Online  
20 441 First: Epub Date]].
- 21 442 37. Alaba O, Chola L. The social determinants of multimorbidity in South Africa. *International journal*  
22 443 *for equity in health* 2013;**12**(1):1-10 doi: 10.1186/1475-9276-12-63[published Online First:  
23 444 Epub Date]].
- 24 445 38. Foguet-Boreu Q, Violan C, Roso-Llorach A, et al. Impact of multimorbidity: acute morbidity, area  
25 446 of residency and use of health services across the life span in a region of south Europe. *BMC*  
26 447 *Family Practice* 2014;**15**(1):1-11 doi: 10.1186/1471-2296-15-55[published Online First: Epub  
27 448 Date]].
- 28 449 39. Macinko J, Lima Costa MF. Access to, use of and satisfaction with health services among adults  
29 450 enrolled in Brazil's Family Health Strategy: evidence from the 2008 National Household  
30 451 Survey. *Tropical medicine & international health : TM & IH* 2012;**17**(1):36-42 doi:  
31 452 10.1111/j.1365-3156.2011.02866.x[published Online First: Epub Date]].
- 32 453 40. Prados-Torres A, Calderón-Larrañaga A, Hancoco-Saavedra J, et al. Multimorbidity patterns: a  
33 454 systematic review. *Journal of Clinical Epidemiology* 2014;**67**(3):254-66 doi:  
34 455 <http://dx.doi.org/10.1016/j.jclinepi.2013.09.021>[published Online First: Epub Date]].
- 35 456 41. Prados-Torres A, Poblador-Plou B, Calderón-Larrañaga A, et al. Multimorbidity Patterns in Primary  
36 457 Care: Interactions among Chronic Diseases Using Factor Analysis. *PLoS ONE*  
37 458 2012;**7**(2):e32190 doi: 10.1371/journal.pone.0032190[published Online First: Epub Date]].
- 38 459 42. Garin N, Koyanagi A, Chatterji S, et al. Global Multimorbidity Patterns: A Cross-Sectional,  
39 460 Population-Based, Multi-Country Study. *The Journals of Gerontology Series A: Biological*  
40 461 *Sciences and Medical Sciences* 2016;**71**(2):205-14 doi: 10.1093/gerona/glv128[published  
41 462 Online First: Epub Date]].
- 42 463 43. Barnes PJ, Celli BR. Systemic manifestations and comorbidities of COPD. *European Respiratory*  
43 464 *Journal* 2009;**33**(5):1165-85 doi: 10.1183/09031936.00128008[published Online First: Epub  
44 465 Date]].
- 45 466 44. Faner R, Cruz T, López-Giraldo A, et al. Network medicine, multimorbidity and the lung in the  
46 467 elderly. *European Respiratory Journal* 2014;**44**(3):775-88 doi:  
47 468 10.1183/09031936.00078714[published Online First: Epub Date]].
- 48 469 45. Huntley AL, Johnson R, Purdy S, et al. Measures of multimorbidity and morbidity burden for use  
49 470 in primary care and community settings: a systematic review and guide. *Annals of family*  
50 471 *medicine* 2012;**10**(2):134-41 doi: 10.1370/afm.1363[published Online First: Epub Date]].
- 51 472 46. Violan C, Foguet-Boreu Q, Hermosilla-Perez E, et al. Comparison of the information provided by  
52 473 electronic health records data and a population health survey to estimate prevalence of  
53 474 selected health conditions and multimorbidity. *BMC Public Health* 2013;**13**(1):251



475 **Tables and figures**

476 Table 1. Description of the sample and multimorbidity frequency. Brazil, 2013.

| Variables                          | n      | %    | Multimorbidity |             |      |             |
|------------------------------------|--------|------|----------------|-------------|------|-------------|
|                                    |        |      | %              | ≥2<br>95%CI | %    | ≥3<br>95%CI |
| <b>Sex</b>                         |        |      |                |             |      |             |
| Male                               | 25,920 | 44.9 | 17.5           | 16.6; 18.3  | 7.2  | 6.6; 7.8    |
| Female                             | 34,282 | 55.1 | 26.1           | 25.2; 27.0  | 12.6 | 12.0; 13.3  |
| <b>Age (in years)</b>              |        |      |                |             |      |             |
| 18 to 29                           | 14,321 | 24.3 | 4.9            | 4.2; 5.6    | 1.2  | 0.9; 1.5    |
| 30 to 39                           | 14,269 | 21.0 | 10.6           | 9.6; 11.5   | 2.8  | 2.3; 3.3    |
| 40 to 49                           | 11,405 | 18.8 | 20.8           | 19.5; 22.1  | 7.8  | 7.0; 8.6    |
| 50 to 59                           | 9,030  | 16.8 | 32.9           | 31.2; 34.6  | 15.5 | 14.3; 16.8  |
| 60 to 69                           | 6,238  | 10.8 | 46.3           | 44.1; 48.6  | 24.7 | 22.8; 26.6  |
| 70 to 79                           | 3,441  | 5.7  | 52.2           | 49.2; 55.2  | 30.9 | 28.0; 33.9  |
| 80 or more                         | 1,498  | 2.6  | 52.8           | 48.6; 57.0  | 30.6 | 26.5; 34.7  |
| <b>Skin color*</b>                 |        |      |                |             |      |             |
| White                              | 24,106 | 47.8 | 24.3           | 23.3; 25.4  | 11.6 | 10.8; 12.3  |
| Black                              | 5,631  | 9.2  | 22.2           | 20.2; 24.2  | 10.3 | 8.9; 11.6   |
| Brown                              | 29,512 | 41.7 | 19.8           | 18.9; 20.6  | 8.6  | 8.1; 9.2    |
| <b>Marital status</b>              |        |      |                |             |      |             |
| Without partner                    | 25,680 | 38.4 | 20.6           | 19.7; 21.5  | 9.9  | 9.3; 10.6   |
| With partner                       | 34,522 | 61.6 | 23.2           | 22.4; 24.1  | 10.4 | 9.7; 11.0   |
| <b>Schooling (in years)</b>        |        |      |                |             |      |             |
| 0                                  | 9,434  | 13.9 | 33.2           | 31.4; 35.0  | 16.3 | 14.9; 17.7  |
| 1-8                                | 14,649 | 25.7 | 30.0           | 28.6; 31.4  | 16.1 | 14.9; 17.2  |
| 8-11                               | 9,215  | 15.3 | 17.9           | 16.5; 19.3  | 7.5  | 6.5; 8.4    |
| ≥12                                | 26,904 | 45.2 | 15.8           | 15.0; 16.7  | 5.9  | 5.4; 6.5    |
| <b>Wealth index (in quintiles)</b> |        |      |                |             |      |             |
| 1° (High)                          | 10,153 | 22.3 | 22.0           | 20.5; 23.6  | 9.3  | 8.3; 10.4   |
| 2°                                 | 11,531 | 22.4 | 22.3           | 21.0; 23.6  | 10.5 | 9.5; 11.5   |
| 3°                                 | 11,621 | 19.5 | 23.1           | 21.8; 24.4  | 10.6 | 9.7; 11.5   |
| 4°                                 | 14,380 | 21.0 | 22.2           | 20.9; 23.5  | 10.6 | 9.7; 11.6   |
| 5° (Low)                           | 12,517 | 14.7 | 21.3           | 19.9; 22.7  | 9.9  | 8.9; 10.9   |
| <b>Private health plan</b>         |        |      |                |             |      |             |
| No                                 | 43,834 | 69.4 | 21.1           | 20.3; 21.9  | 9.8  | 9.3; 10.4   |
| Yes                                | 16,368 | 30.6 | 24.8           | 23.5; 26.1  | 11.0 | 10.1; 12.0  |
| <b>Geographical area</b>           |        |      |                |             |      |             |
| Urban                              | 49,245 | 86.5 | 22.8           | 22.0; 23.5  | 10.5 | 10.0; 11.1  |
| Rural                              | 10,957 | 13.5 | 18.6           | 17.2; 20.0  | 8.0  | 7.1; 8.8    |
| <b>State-level education</b>       |        |      |                |             |      |             |

|                           |               |              |             |                   |             |                  |
|---------------------------|---------------|--------------|-------------|-------------------|-------------|------------------|
| High                      | 22,382        | 37.2         | 24.7        | 23.7; 25.7        | 11.7        | 10.9; 12.4       |
| Middle                    | 19,515        | 32.4         | 20.1        | 18.6; 21.7        | 9.3         | 8.3; 10.4        |
| Low                       | 18,305        | 30.4         | 19.0        | 18.0; 20.1        | 8.0         | 7.3; 8.6         |
| <b>State-level income</b> |               |              |             |                   |             |                  |
| High                      | 21,683        | 36.0         | 24.6        | 23.6; 25.7        | 11.6        | 10.8; 12.3       |
| Middle                    | 18,087        | 30.0         | 21.8        | 20.2; 23.3        | 10.5        | 9.5; 11.6        |
| Low                       | 20,432        | 33.9         | 18.2        | 17.2; 19.2        | 7.5         | 6.9; 8.1         |
| <b>Total</b>              | <b>60,202</b> | <b>100.0</b> | <b>22.2</b> | <b>21.5; 22.9</b> | <b>10.2</b> | <b>9.7; 10.7</b> |

For peer review only

477 Table 2. Adjusted multilevel models of multimorbidity with independent variables. Brazil, 2013.

| Variables                                      | Multimorbidity (≥2) |                   |             |                   |             |                   | Multimorbidity (≥3) |                   |             |                   |             |                   |
|------------------------------------------------|---------------------|-------------------|-------------|-------------------|-------------|-------------------|---------------------|-------------------|-------------|-------------------|-------------|-------------------|
|                                                | Model 1             |                   | Model 2     |                   | Model 3     |                   | Model 1             |                   | Model 2     |                   | Model 3     |                   |
|                                                | OR                  | CI95%             | OR          | CI95%             | OR          | CI95%             | OR                  | CI95%             | OR          | CI95%             | OR          | CI95%             |
| <b>Sex (ref: male)</b>                         |                     |                   |             |                   |             |                   |                     |                   |             |                   |             |                   |
| Female                                         | <b>1.84</b>         | <b>1.76; 1.94</b> | <b>1.85</b> | <b>1.77; 1.94</b> | <b>1.85</b> | <b>1.77; 1.94</b> | <b>1.95</b>         | <b>1.83; 2.08</b> | <b>1.95</b> | <b>1.83; 2.08</b> | <b>1.95</b> | <b>1.83; 2.09</b> |
| <b>Age (in years)</b>                          | <b>1.06</b>         | <b>1.06; 1.06</b> | <b>1.06</b> | <b>1.06; 1.06</b> | <b>1.06</b> | <b>1.06; 1.06</b> | <b>1.06</b>         | <b>1.06; 1.06</b> | <b>1.06</b> | <b>1.06; 1.06</b> | <b>1.06</b> | <b>1.06; 1.06</b> |
| <b>Skin color* (ref: White)</b>                |                     |                   |             |                   |             |                   |                     |                   |             |                   |             |                   |
| Black                                          | 1.07                | 0.99; 1.16        | 1.08        | 0.99; 1.17        | 1.08        | 0.99; 1.17        | 1.09                | 0.98; 1.21        | 1.09        | 0.98; 1.21        | 1.09        | 0.98; 1.21        |
| Brown                                          | 1.01                | 0.96; 1.06        | 1.01        | 0.96; 1.07        | 1.01        | 0.96; 1.07        | 0.97                | 0.91; 1.04        | 0.97        | 0.91; 1.04        | 0.97        | 0.91; 1.04        |
| <b>Marital status (ref: Without partner)</b>   |                     |                   |             |                   |             |                   |                     |                   |             |                   |             |                   |
| With partner                                   | <b>1.13</b>         | <b>1.08; 1.18</b> | <b>1.13</b> | <b>1.08; 1.19</b> | <b>1.13</b> | <b>1.08; 1.19</b> | <b>1.17</b>         | <b>1.09; 1.24</b> | <b>1.17</b> | <b>1.09; 1.24</b> | <b>1.17</b> | <b>1.09; 1.24</b> |
| <b>Schooling (in years) # (ref: ≥12)</b>       |                     |                   |             |                   |             |                   |                     |                   |             |                   |             |                   |
| 8-11                                           | <b>1.19</b>         | <b>1.11; 1.28</b> | <b>1.19</b> | <b>1.10; 1.28</b> | <b>1.19</b> | <b>1.10; 1.28</b> | <b>1.22</b>         | <b>1.10; 1.35</b> | <b>1.22</b> | <b>1.10; 1.35</b> | <b>1.22</b> | <b>1.10; 1.35</b> |
| 1-8                                            | <b>1.41</b>         | <b>1.33; 1.51</b> | <b>1.41</b> | <b>1.33; 1.50</b> | <b>1.41</b> | <b>1.33; 1.50</b> | <b>1.57</b>         | <b>1.44; 1.71</b> | <b>1.57</b> | <b>1.44; 1.71</b> | <b>1.57</b> | <b>1.44; 1.71</b> |
| 0                                              | <b>1.34</b>         | <b>1.24; 1.44</b> | <b>1.34</b> | <b>1.24; 1.44</b> | <b>1.34</b> | <b>1.24; 1.44</b> | <b>1.41</b>         | <b>1.27; 1.56</b> | <b>1.41</b> | <b>1.28; 1.56</b> | <b>1.41</b> | <b>1.28; 1.56</b> |
| <b>Wealth index (in quintiles) (ref: High)</b> |                     |                   |             |                   |             |                   |                     |                   |             |                   |             |                   |
| 2°                                             | <b>1.12</b>         | <b>1.04; 1.20</b> | <b>1.12</b> | <b>1.04; 1.20</b> | <b>1.12</b> | <b>1.04; 1.20</b> | <b>1.15</b>         | <b>1.04; 1.28</b> | <b>1.15</b> | <b>1.04; 1.28</b> | <b>1.15</b> | <b>1.04; 1.28</b> |
| 3°                                             | <b>1.21</b>         | <b>1.12; 1.31</b> | <b>1.21</b> | <b>1.12; 1.31</b> | <b>1.21</b> | <b>1.12; 1.31</b> | <b>1.19</b>         | <b>1.07; 1.33</b> | <b>1.19</b> | <b>1.07; 1.33</b> | <b>1.19</b> | <b>1.07; 1.33</b> |
| 4°                                             | 1.05                | 0.96; 1.14        | 1.05        | 0.97; 1.14        | 1.05        | 0.97; 1.14        | 1.09                | 0.98; 1.22        | 1.10        | 0.98; 1.23        | 1.10        | 0.98; 1.23        |
| 5° (Low)                                       | 0.91                | 0.83; 1.00        | 0.92        | 0.84; 1.01        | 0.92        | 0.84; 1.01        | 0.95                | 0.84; 1.08        | 0.95        | 0.84; 1.08        | 0.95        | 0.84; 1.08        |
| <b>Private health plan (ref: no)</b>           |                     |                   |             |                   |             |                   |                     |                   |             |                   |             |                   |
| Yes                                            | <b>1.15</b>         | <b>1.08; 1.21</b> | <b>1.15</b> | <b>1.08; 1.20</b> | <b>1.15</b> | <b>1.08; 1.20</b> | <b>1.09</b>         | <b>1.01; 1.18</b> | <b>1.09</b> | <b>1.01; 1.18</b> | <b>1.09</b> | <b>1.01; 1.18</b> |
| <b>Geographical area (ref: urban)</b>          |                     |                   |             |                   |             |                   |                     |                   |             |                   |             |                   |
| Rural                                          | <b>0.86</b>         | <b>0.80; 0.92</b> | <b>0.86</b> | <b>0.80; 0.92</b> | <b>0.86</b> | <b>0.80; 0.92</b> | <b>0.78</b>         | <b>0.71; 0.86</b> | <b>0.78</b> | <b>0.71; 0.86</b> | <b>0.78</b> | <b>0.71; 0.86</b> |
| <b>State-level education (ref: High)</b>       |                     |                   |             |                   |             |                   |                     |                   |             |                   |             |                   |
| Middle                                         |                     |                   | <b>0.82</b> | <b>0.71; 0.94</b> |             |                   |                     |                   | <b>0.76</b> | <b>0.64; 0.90</b> |             |                   |
| Low                                            |                     |                   | <b>0.83</b> | <b>0.72; 0.96</b> |             |                   |                     |                   | <b>0.76</b> | <b>0.64; 0.90</b> |             |                   |
| <b>State-level income (ref: High)</b>          |                     |                   |             |                   |             |                   |                     |                   |             |                   |             |                   |
| Middle                                         |                     |                   |             |                   | 0.89        | 0.77; 1.04        |                     |                   |             |                   | 0.88        | 0.73; 1.05        |
| Low                                            |                     |                   |             |                   | <b>0.82</b> | <b>0.71; 0.95</b> |                     |                   |             |                   | <b>0.75</b> | <b>0.63; 0.89</b> |

478

479 Table 3. Adjusted multilevel models of multimorbidity with independent variables stratified by region. Brazil, 2013.

| Variables                                          | Northern region   |                   | Northeastern region |                   | Central Western region |                   | Southeastern region |                   | Southern region   |                   |
|----------------------------------------------------|-------------------|-------------------|---------------------|-------------------|------------------------|-------------------|---------------------|-------------------|-------------------|-------------------|
|                                                    | MM (≥2)           | MM (≥3)           | MM (≥2)             | MM (≥3)           | MM (≥2)                | MM (≥3)           | MM (≥2)             | MM (≥3)           | MM (≥2)           | MM (≥3)           |
|                                                    | OR                | OR                | OR                  | OR                | OR                     | OR                | OR                  | OR                | OR                | OR                |
|                                                    | CI95%             | CI95%             | CI95%               | CI95%             | CI95%                  | CI95%             | CI95%               | CI95%             | CI95%             | CI95%             |
| <b>Sex (ref: male)</b>                             |                   |                   |                     |                   |                        |                   |                     |                   |                   |                   |
| Female                                             | <b>1.81</b>       | <b>2.06</b>       | <b>1.96</b>         | <b>2.08</b>       | <b>2.22</b>            | <b>2.37</b>       | <b>1.62</b>         | <b>1.61</b>       | <b>1.84</b>       | <b>2.04</b>       |
|                                                    | <b>1.62; 2.02</b> | <b>1.75; 2.43</b> | <b>1.8; 2.14</b>    | <b>1.84; 2.36</b> | <b>1.94; 2.54</b>      | <b>1.97; 2.86</b> | <b>1.48; 1.78</b>   | <b>1.43; 1.82</b> | <b>1.63; 2.08</b> | <b>1.73; 2.39</b> |
| <b>Age (in years)</b>                              | <b>1.05</b>       | <b>1.06</b>       | <b>1.06</b>         | <b>1.06</b>       | <b>1.07</b>            | <b>1.07</b>       | <b>1.05</b>         | <b>1.05</b>       | <b>1.06</b>       | <b>1.06</b>       |
|                                                    | <b>1.05; 1.06</b> | <b>1.05; 1.06</b> | <b>1.06; 1.06</b>   | <b>1.06; 1.06</b> | <b>1.06; 1.07</b>      | <b>1.06; 1.07</b> | <b>1.05; 1.06</b>   | <b>1.05; 1.06</b> | <b>1.05; 1.06</b> | <b>1.06; 1.07</b> |
| <b>Marital status (ref: Without partner)</b>       |                   |                   |                     |                   |                        |                   |                     |                   |                   |                   |
| With partner                                       | <b>1.13</b>       | <b>1.17</b>       | <b>1.16</b>         | <b>1.23</b>       | 1.00                   | 0.93              | <b>1.15</b>         | <b>1.22</b>       | <b>1.16</b>       | <b>1.19</b>       |
|                                                    | <b>1.02; 1.27</b> | <b>1; 1.38</b>    | <b>1.07; 1.27</b>   | <b>1.09; 1.39</b> | 0.87; 1.14             | 0.78; 1.11        | <b>1.05; 1.26</b>   | <b>1.08; 1.38</b> | <b>1.02; 1.32</b> | <b>1.01; 1.4</b>  |
| <b>Skin color* (ref: White)</b>                    |                   |                   |                     |                   |                        |                   |                     |                   |                   |                   |
| Black                                              | 1.01              | 1.06              | 1.12                | 1.14              | 0.94                   | 0.89              | 1.11                | 1.15              | 1.00              | 0.98              |
|                                                    | 0.82; 1.23        | 0.79; 1.42        | 0.97; 1.3           | 0.94; 1.39        | 0.74; 1.21             | 0.63; 1.26        | 0.96; 1.29          | 0.95; 1.4         | 0.76; 1.31        | 0.7; 1.38         |
| Brown                                              | 0.92              | 0.92              | 0.96                | 0.93              | 1.13                   | 1.14              | 1.07                | 1.02              | 1.08              | 0.88              |
|                                                    | 0.81; 1.04        | 0.76; 1.1         | 0.87; 1.05          | 0.81; 1.05        | 0.98; 1.29             | 0.95; 1.36        | 0.97; 1.18          | 0.89; 1.16        | 0.91; 1.27        | 0.71; 1.09        |
| <b>Schooling (in years) # (ref: more educated)</b> |                   |                   |                     |                   |                        |                   |                     |                   |                   |                   |
| III                                                | 1.17              | 1.12              | 1.10                | 0.95              | 1.16                   | 1.32              | <b>1.35</b>         | <b>1.47</b>       | 1.12              | 1.27              |
|                                                    | 0.99; 1.39        | 0.86; 1.47        | 0.95; 1.28          | 0.76; 1.18        | 0.94; 1.42             | 0.99; 1.75        | <b>1.18; 1.55</b>   | <b>1.22; 1.78</b> | 0.94; 1.35        | 0.99; 1.62        |
| II                                                 | <b>1.23</b>       | <b>1.36</b>       | <b>1.33</b>         | <b>1.35</b>       | <b>1.33</b>            | <b>1.32</b>       | <b>1.65</b>         | <b>1.89</b>       | <b>1.43</b>       | <b>1.73</b>       |
|                                                    | <b>1.05; 1.44</b> | <b>1.08; 1.71</b> | <b>1.18; 1.51</b>   | <b>1.14; 1.6</b>  | <b>1.11; 1.59</b>      | <b>1.03; 1.68</b> | <b>1.46; 1.86</b>   | <b>1.61; 2.22</b> | <b>1.22; 1.68</b> | <b>1.41; 2.13</b> |
| I (less educated)                                  | <b>1.32</b>       | <b>1.48</b>       | <b>1.38</b>         | <b>1.36</b>       | 1.17                   | 1.25              | <b>1.43</b>         | <b>1.40</b>       | 1.19              | <b>1.46</b>       |
|                                                    | <b>1.12; 1.55</b> | <b>1.16; 1.88</b> | <b>1.21; 1.58</b>   | <b>1.13; 1.65</b> | 0.94; 1.46             | 0.94; 1.68        | <b>1.22; 1.67</b>   | <b>1.14; 1.71</b> | 0.97; 1.47        | <b>1.12; 1.89</b> |
| <b>Wealth index (in quintiles) (ref: High)</b>     |                   |                   |                     |                   |                        |                   |                     |                   |                   |                   |
| 2°                                                 | 1.03              | 0.92              | 1.07                | 1.21              | <b>1.29</b>            | 1.17              | 1.03                | 1.09              | <b>1.22</b>       | 1.25              |
|                                                    | 0.83; 1.29        | 0.67; 1.27        | 0.91; 1.26          | 0.96; 1.52        | <b>1.05; 1.58</b>      | 0.89; 1.55        | 0.90; 1.18          | 0.91; 1.3         | <b>1.04; 1.44</b> | 1.00; 1.57        |
| 3°                                                 | 1.21              | 0.98              | <b>1.26</b>         | <b>1.40</b>       | 1.19                   | 1.10              | 1.02                | 1.05              | <b>1.42</b>       | <b>1.33</b>       |
|                                                    | 0.98; 1.51        | 0.71; 1.34        | <b>1.07; 1.48</b>   | <b>1.11; 1.76</b> | 0.95; 1.48             | 0.82; 1.48        | 0.89; 1.18          | 0.87; 1.27        | <b>1.18; 1.7</b>  | <b>1.05; 1.69</b> |
| 4°                                                 | 0.90              | 0.82              | 1.07                | 1.22              | 1.13                   | 1.18              | 0.96                | 0.98              | <b>1.34</b>       | 1.30              |
|                                                    | 0.72; 1.12        | 0.60; 1.11        | 0.91; 1.26          | 0.97; 1.53        | 0.9; 1.42              | 0.88; 1.59        | 0.82; 1.12          | 0.79; 1.20        | <b>1.09; 1.66</b> | 1.00; 1.7         |
| 5° (Low)                                           | 0.80              | 0.74              | 0.93                | 0.97              | 1.05                   | 1.16              | 0.94                | 1.13              | 0.92              | 0.85              |
|                                                    | 0.64; 1.01        | 0.53; 1.03        | 0.78; 1.12          | 0.76; 1.25        | 0.80; 1.36             | 0.83; 1.62        | 0.77; 1.14          | 0.88; 1.45        | 0.71; 1.20        | 0.61; 1.19        |

1  
2  
3  
4  
5  
6  
7  
8  
9  
10  
11  
12  
13  
14  
15  
16  
17  
18  
19  
20  
21  
22  
23  
24  
25  
26  
27  
28  
29  
30  
31  
32  
33  
34  
35  
36  
37  
38  
39  
40  
41  
42  
43  
44  
45  
46  
47  
48  
49

**Private health plan (ref: no)**

|     |            |                   |                   |                   |            |            |                   |           |            |            |
|-----|------------|-------------------|-------------------|-------------------|------------|------------|-------------------|-----------|------------|------------|
| Yes | 1.15       | <b>1.29</b>       | <b>1.23</b>       | <b>1.22</b>       | 1.15       | 1.16       | <b>1.12</b>       | 1.05      | 1.10       | 0.91       |
|     | 0.98; 1.35 | <b>1.02; 1.61</b> | <b>1.09; 1.39</b> | <b>1.04; 1.44</b> | 0.99; 1.34 | 0.95; 1.41 | <b>1.01; 1.24</b> | 0.92; 1.2 | 0.96; 1.25 | 0.77; 1.09 |

**Geographical area (ref: urban)**

|       |            |                   |                   |                   |            |            |            |            |                   |            |
|-------|------------|-------------------|-------------------|-------------------|------------|------------|------------|------------|-------------------|------------|
| Rural | 0.89       | <b>0.76</b>       | <b>0.84</b>       | <b>0.75</b>       | 0.91       | 0.85       | 0.88       | 0.82       | <b>0.82</b>       | 0.83       |
|       | 0.77; 1.03 | <b>0.61; 0.94</b> | <b>0.75; 0.94</b> | <b>0.64; 0.88</b> | 0.75; 1.11 | 0.65; 1.11 | 0.76; 1.02 | 0.67; 1.00 | <b>0.68; 0.97</b> | 0.67; 1.04 |

480 Note: MM = Multimorbidity

481  
482

For peer review only

483 Table 4. Adjusted multilevel models of patterns of diseases (factors) with independent variables. Brazil, 2013.

| Variables                                          | Factor 1 (Cardiometabolic) |              |         |              |         |              | Factor 2 (Respiratory/mental/<br>muscle-skeletal) |              |         |              |         |              |  |
|----------------------------------------------------|----------------------------|--------------|---------|--------------|---------|--------------|---------------------------------------------------|--------------|---------|--------------|---------|--------------|--|
|                                                    | Model 1                    |              | Model 2 |              | Model 3 |              | Model 1                                           |              | Model 2 |              | Model 3 |              |  |
|                                                    | β                          | CI95%        | β       | CI95%        | β       | CI95%        | β                                                 | CI95%        | β       | CI95%        | β       | CI95%        |  |
| <b>Sex (ref: male)</b>                             |                            |              |         |              |         |              |                                                   |              |         |              |         |              |  |
| Female                                             | .024                       | .022; .026   | .024    | .022; .026   | .024    | .022; .026   | .038                                              | .036; .040   | .038    | .036; .040   | .038    | .036; .040   |  |
| <b>Age (in years)</b>                              | .004                       | .004; .004   | .004    | .004; .004   | .004    | .004; .004   | .001                                              | .001; .001   | .001    | .001; .001   | .001    | .001; .001   |  |
| <b>Skin color* (ref: White)</b>                    |                            |              |         |              |         |              |                                                   |              |         |              |         |              |  |
| Black                                              | .007                       | .003; .010   | .007    | .003; .010   | .007    | .003; .010   | -.009                                             | -.013; -.005 | -.009   | -.013; -.005 | -.009   | -.013; -.005 |  |
| Brown                                              | .001                       | -.001; .004  | .002    | -.001; .004  | .002    | -.001; .004  | -.004                                             | -.006; -.001 | -.004   | -.006; -.001 | -.004   | -.006; -.001 |  |
| <b>Marital status (ref: Without partner)</b>       |                            |              |         |              |         |              |                                                   |              |         |              |         |              |  |
| With partner                                       | .000                       | -.002; .002  | .000    | -.002; .002  | .000    | -.002; .002  | -.005                                             | -.007; -.002 | -.005   | -.007; -.003 | -.005   | -.007; -.003 |  |
| <b>Schooling (in years)<sup>#</sup> (ref: ≥12)</b> |                            |              |         |              |         |              |                                                   |              |         |              |         |              |  |
| 8-11                                               | .013                       | .010; .016   | .013    | .010; .016   | .013    | .010; .016   | .004                                              | .001; .008   | .005    | .002; .008   | .005    | .002; .008   |  |
| 1-8                                                | .021                       | .018; .023   | .021    | .018; .023   | .021    | .018; .023   | .011                                              | .008; .014   | .011    | .008; .014   | .011    | .008; .014   |  |
| 0                                                  | .014                       | .010; .017   | .014    | .010; .017   | .014    | .010; .017   | .001                                              | -.003; .004  | .001    | -.003; .005  | .001    | -.003; .005  |  |
| <b>Wealth index (in quintiles) (ref: High)</b>     |                            |              |         |              |         |              |                                                   |              |         |              |         |              |  |
| 2°                                                 | .007                       | .004; .010   | .007    | .004; .010   | .007    | .004; .010   | .005                                              | .001; .008   | .005    | .001; .008   | .005    | .001; .008   |  |
| 3°                                                 | .009                       | .006; .013   | .009    | .006; .013   | .009    | .006; .013   | .010                                              | .006; .014   | .010    | .006; .014   | .010    | .006; .014   |  |
| 4°                                                 | .006                       | .002; .009   | .006    | .002; .009   | .006    | .002; .009   | .004                                              | .000; .008   | .004    | .000; .008   | .004    | .000; .008   |  |
| 5° (Low)                                           | -.003                      | -.007; .001  | -.003   | -.007; .001  | -.003   | -.007; .001  | .001                                              | -.004; .005  | .001    | -.004; .005  | .001    | -.004; .005  |  |
| <b>Private health plan (ref: no)</b>               |                            |              |         |              |         |              |                                                   |              |         |              |         |              |  |
| Yes                                                | .006                       | .004; .009   | .006    | .004; .009   | .006    | .004; .009   | .007                                              | .005; .010   | .007    | .005; .010   | .007    | .005; .010   |  |
| <b>Geographical area (ref: urban)</b>              |                            |              |         |              |         |              |                                                   |              |         |              |         |              |  |
| Rural                                              | -.008                      | -.011; -.005 | -.008   | -.011; -.005 | -.008   | -.011; -.005 | -.002                                             | -.005; .002  | -.002   | -.005; .002  | -.002   | -.005; .002  |  |
| <b>State-level education (ref: High)</b>           |                            |              |         |              |         |              |                                                   |              |         |              |         |              |  |
| Middle                                             |                            |              | -.010   | -.016; -.004 |         |              |                                                   |              | -.016   | -.027; -.005 |         |              |  |
| Low                                                |                            |              | -.008   | -.015; -.002 |         |              |                                                   |              | -.018   | -.029; -.006 |         |              |  |
| <b>State-level income (ref: High)</b>              |                            |              |         |              |         |              |                                                   |              |         |              |         |              |  |
| Middle                                             |                            |              |         |              | -.006   | -.012; .001  |                                                   |              |         |              | -.011   | -.022; .001  |  |
| Low                                                |                            |              |         |              | -.009   | -.016; -.003 |                                                   |              |         |              | -.017   | -.028; -.006 |  |

484

485

486 Table 5. Adjusted multilevel models of multimorbidity factors with independent variables stratified by region. Brazil, 2013.

| Variables                                          | Northern region     |                       | Northeastern region |                     | Central Western region |                      | Southeastern region |                      | Southern region     |                       |
|----------------------------------------------------|---------------------|-----------------------|---------------------|---------------------|------------------------|----------------------|---------------------|----------------------|---------------------|-----------------------|
|                                                    | Factor 1            | Factor 2              | Factor 1            | Factor 2            | Factor 1               | Factor 2             | Factor 1            | Factor 2             | Factor 1            | Factor 2              |
|                                                    | $\beta$             | $\beta$               | $\beta$             | $\beta$             | $\beta$                | $\beta$              | $\beta$             | $\beta$              | $\beta$             | $\beta$               |
|                                                    | CI95%               | CI95%                 | CI95%               | CI95%               | CI95%                  | CI95%                | CI95%               | CI95%                | CI95%               | CI95%                 |
| <b>Sex (ref: male)</b>                             |                     |                       |                     |                     |                        |                      |                     |                      |                     |                       |
| Female                                             | <b>0.022</b>        | <b>0.023</b>          | <b>0.027</b>        | <b>0.030</b>        | <b>0.029</b>           | <b>0.050</b>         | <b>0.020</b>        | <b>0.041</b>         | <b>0.023</b>        | <b>0.061</b>          |
|                                                    | <b>0.018; 0.026</b> | <b>0.019; 0.027</b>   | <b>0.023; 0.03</b>  | <b>0.027; 0.034</b> | <b>0.023; 0.034</b>    | <b>0.044; 0.056</b>  | <b>0.015; 0.024</b> | <b>0.036; 0.045</b>  | <b>0.017; 0.03</b>  | <b>0.053; 0.069</b>   |
| <b>Age (in years)</b>                              | <b>0.003</b>        | <b>0.001</b>          | <b>0.004</b>        | <b>0.001</b>        | <b>0.004</b>           | <b>0.001</b>         | <b>0.004</b>        | <b>0.001</b>         | <b>0.004</b>        | <b>0.002</b>          |
|                                                    | <b>0.003; 0.003</b> | <b>0.001; 0.001</b>   | <b>0.003; 0.004</b> | <b>0.001; 0.001</b> | <b>0.004; 0.004</b>    | <b>0.001; 0.002</b>  | <b>0.004; 0.004</b> | <b>0.001; 0.001</b>  | <b>0.004; 0.004</b> | <b>0.001; 0.002</b>   |
| <b>Marital status (ref: Without partner)</b>       |                     |                       |                     |                     |                        |                      |                     |                      |                     |                       |
| With partner                                       | 0.001               | -0.002                | 0.000               | -0.002              | <b>-0.007</b>          | <b>-0.013</b>        | 0.001               | -0.005               | 0.002               | <b>-0.010</b>         |
|                                                    | -0.003; 0.005       | -0.006; 0.003         | -0.003; 0.004       | -0.005; 0.002       | <b>-0.013; -0.002</b>  | <b>-0.02; -0.007</b> | -0.003; 0.005       | -0.010; 0.000        | -0.004; 0.009       | <b>-0.018; -0.002</b> |
| <b>Skin color* (ref: White)</b>                    |                     |                       |                     |                     |                        |                      |                     |                      |                     |                       |
| Black                                              | 0.005               | -0.007                | <b>0.007</b>        | -0.003              | -0.001                 | <b>-0.021</b>        | <b>0.008</b>        | <b>-0.011</b>        | 0.013               | -0.018                |
|                                                    | -0.002; 0.013       | -0.015; 0.001         | <b>0.001; 0.013</b> | -0.01; 0.003        | -0.011; 0.009          | <b>-0.033; -0.01</b> | <b>0.001; 0.016</b> | <b>-0.02; -0.003</b> | -0.001; 0.026       | -0.036; 0.000         |
| Brown                                              | -0.002              | <b>-0.007</b>         | -0.001              | -0.003              | 0.004                  | -0.003               | 0.004               | -0.002               | 0.005               | 0.004                 |
|                                                    | -0.007; 0.002       | <b>-0.012; -0.002</b> | -0.005; 0.003       | -0.008; 0.001       | -0.001; 0.01           | -0.010; 0.004        | -0.001; 0.009       | -0.008; 0.003        | -0.003; 0.014       | -0.007; 0.015         |
| <b>Schooling (in years) # (ref: more educated)</b> |                     |                       |                     |                     |                        |                      |                     |                      |                     |                       |
| III                                                | 0.006               | <b>0.007</b>          | <b>0.011</b>        | 0.000               | <b>0.012</b>           | -0.001               | <b>0.016</b>        | 0.007                | <b>0.019</b>        | 0.010                 |
|                                                    | 0.000; 0.011        | <b>0.001; 0.013</b>   | <b>0.006; 0.017</b> | -0.006; 0.006       | <b>0.004; 0.02</b>     | -0.011; 0.008        | <b>0.010; 0.023</b> | 0.000; 0.014         | <b>0.01; 0.028</b>  | -0.002; 0.021         |
| II                                                 | <b>0.009</b>        | 0.005                 | <b>0.015</b>        | <b>0.006</b>        | <b>0.016</b>           | -0.001               | <b>0.029</b>        | <b>0.019</b>         | <b>0.037</b>        | <b>0.020</b>          |
|                                                    | <b>0.003; 0.014</b> | -0.001; 0.011         | <b>0.010; 0.020</b> | <b>0.001; 0.012</b> | <b>0.009; 0.024</b>    | -0.01; 0.008         | <b>0.023; 0.035</b> | <b>0.013; 0.026</b>  | <b>0.028; 0.046</b> | <b>0.009; 0.031</b>   |
| I (less educated)                                  | <b>0.014</b>        | <b>0.008</b>          | <b>0.010</b>        | 0.002               | <b>0.015</b>           | -0.009               | <b>0.022</b>        | -0.002               | <b>0.016</b>        | -0.005                |
|                                                    | <b>0.008; 0.02</b>  | <b>0.001; 0.014</b>   | <b>0.004; 0.015</b> | -0.004; 0.008       | <b>0.005; 0.025</b>    | -0.021; 0.002        | <b>0.014; 0.03</b>  | -0.011; 0.007        | <b>0.004; 0.027</b> | -0.02; 0.01           |
| <b>Wealth index (in quintiles) (ref: High)</b>     |                     |                       |                     |                     |                        |                      |                     |                      |                     |                       |
| 2°                                                 | 0.005               | 0.005                 | 0.005               | 0.002               | 0.008                  | 0.004                | 0.004               | -0.003               | <b>0.011</b>        | <b>0.017</b>          |
|                                                    | -0.003; 0.013       | -0.004; 0.013         | -0.002; 0.011       | -0.005; 0.009       | -0.001; 0.016          | -0.005; 0.014        | -0.002; 0.011       | -0.01; 0.004         | <b>0.003; 0.002</b> | <b>0.007; 0.028</b>   |
| 3°                                                 | <b>0.009</b>        | 0.004                 | <b>0.012</b>        | <b>0.010</b>        | 0.002                  | 0.002                | 0.004               | 0.002                | <b>0.012</b>        | <b>0.027</b>          |
|                                                    | <b>0.001; 0.017</b> | -0.004; 0.013         | <b>0.005; 0.018</b> | <b>0.003; 0.017</b> | -0.007; 0.011          | -0.008; 0.013        | -0.003; 0.011       | -0.005; 0.01         | <b>0.003; 0.021</b> | <b>0.015; 0.039</b>   |

|                                       |                       |                     |                       |                       |                       |                     |               |                       |               |                     |
|---------------------------------------|-----------------------|---------------------|-----------------------|-----------------------|-----------------------|---------------------|---------------|-----------------------|---------------|---------------------|
| 4°                                    | 0.004                 | -0.001              | 0.005                 | 0.004                 | 0.005                 | 0.005               | 0.003         | -0.007                | 0.009         | <b>0.019</b>        |
|                                       | -0.004; 0.011         | -0.01; 0.007        | -0.002; 0.011         | -0.003; 0.011         | -0.005; 0.014         | -0.006; 0.016       | -0.004; 0.011 | -0.015; 0.001         | -0.002; 0.02  | <b>0.005; 0.033</b> |
| 5° (Low)                              | -0.004                | -0.009              | -0.001                | 0.004                 | 0.001                 | 0.004               | -0.006        | -0.004                | -0.012        | 0.012               |
|                                       | -0.012; 0.004         | -0.017; 0.000       | -0.009; 0.006         | -0.003; 0.012         | -0.010; 0.012         | -0.008; 0.017       | -0.015; 0.004 | -0.015; 0.006         | -0.026; 0.002 | -0.006; 0.029       |
| <b>Private health plan (ref: no)</b>  |                       |                     |                       |                       |                       |                     |               |                       |               |                     |
| Yes                                   | <b>0.009</b>          | <b>0.009</b>        | <b>0.010</b>          | <b>0.008</b>          | 0.007                 | <b>0.009</b>        | 0.002         | <b>0.008</b>          | 0.005         | 0.001               |
|                                       | <b>0.003; 0.015</b>   | <b>0.003; 0.016</b> | <b>0.006; 0.015</b>   | <b>0.003; 0.013</b>   | 0.000; 0.013          | <b>0.001; 0.016</b> | -0.003; 0.006 | <b>0.002; 0.013</b>   | -0.002; 0.012 | -0.008; 0.01        |
| <b>Geographical area (ref: urban)</b> |                       |                     |                       |                       |                       |                     |               |                       |               |                     |
| Rural                                 | <b>-0.007</b>         | 0.004               | <b>-0.008</b>         | <b>-0.006</b>         | <b>-0.009</b>         | <b>-0.001</b>       | -0.007        | <b>-0.010</b>         | -0.008        | 0.009               |
|                                       | <b>-0.012; -0.002</b> | -0.002; 0.009       | <b>-0.013; -0.004</b> | <b>-0.011; -0.001</b> | <b>-0.018; -0.001</b> | <b>-0.01; 0.009</b> | -0.014; 0.000 | <b>-0.018; -0.001</b> | -0.017; 0.002 | -0.003; 0.021       |

487 Note: Factor 1: cardiometabolic; factor 2: (Respiratory/mental/ muscle-skeletal)

488



Supplementary table 1. Individual prevalence, duration and number of comorbidities for each morbidity evaluated. Brazil, 2013.

| Morbidities                            | Individual prevalence |             | Duration of disease    | Number of comorbidities |
|----------------------------------------|-----------------------|-------------|------------------------|-------------------------|
|                                        | %                     | (95%CI)     | Mean (median; Q25-Q75) | Mean (median; Q25-Q75)  |
| High Blood Pressure                    | 22.3                  | 21.7 - 23.0 | 13.1 (9; 3-18)         | 2.3 (2; 1-3)            |
| Spinal column problem                  | 19.0                  | 18.3 - 19.7 | 14.7 (10; 4-21)        | 2.3 (2; 1-3)            |
| Hypercholesterolemia                   | 8.4                   | 8.0 - 8.8   | 6.9 (3; 1-9)           | 2.3 (2; 1-3)            |
| Arthritis/rheumatism                   | 6.7                   | 6.4 - 7.1   | 14.6 (10; 3-20)        | 3.0 (3; 2-4)            |
| Diabetes                               | 6.5                   | 6.2 - 6.9   | 11.3 (6; 2-15)         | 2.9 (3; 2-4)            |
| Asthma/wheezy bronchitis               | 4.4                   | 4.1 - 4.8   | 25.1 (23; 13-35)       | 2.4 (2; 1-3)            |
| Depression                             | 4.2                   | 3.9 - 4.5   | -                      | 2.9 (3; 2-4)            |
| Work-related muscle-skeletal disorders | 2.5                   | 2.2 - 2.8   | 7.5 (5; 2-11)          | 2.5 (2; 1-3)            |
| Cancer                                 | 1.9                   | 1.7 - 2.2   | 8.5 (6; 2-13)          | 2.8 (2; 2-4)            |
| Another heart disease                  | 1.9                   | 1.6 - 2.1   | 13.9 (9; 3-20)         | 3.1 (3; 2-4)            |
| Stroke                                 | 1.6                   | 1.4 - 1.8   | 10.2 (6; 2-13)         | 3.4 (3; 2-5)            |
| Kidney problem                         | 1.5                   | 1.3 - 1.7   | 13.5 (9; 3-20)         | 3.2 (3; 2-4)            |
| Heart attack                           | 1.3                   | 1.2 - 1.5   | 12.4 (7; 2-18)         | 4.0 (4; 3-5)            |
| Heart failure                          | 1.2                   | 1.1 - 1.4   | 13.2 (8; 4-19)         | 4.0 (4; 2-5)            |
| Bronchitis                             | 1.0                   | 0.8 - 1.1   | 23.2 (20; 9-32)        | 3.3 (3; 2-5)            |
| Angina                                 | 0.8                   | 0.7 - 0.9   | 15.5 (11; 5-21)        | 4.5 (4; 3-6)            |
| Emphysema                              | 0.5                   | 0.4 - 0.6   | 14.9 (9; 3-18)         | 3.7 (3; 2-5)            |
| Another lung disease                   | 0.5                   | 0.4 - 0.6   | 16.2 (12; 5-24)        | 2.8 (2; 1-4)            |
| Bipolar disorder                       | 0.4                   | 0.3 - 0.5   | 11.3 (8; 4-16)         | 3.1 (3; 2-4)            |
| Another mental disease                 | 0.3                   | 0.2 - 0.4   | 2.8 (2; 1-4)           | 2.5 (2; 1-3)            |
| Schizophrenia                          | 0.2                   | 0.2 - 0.3   | 19.7 (19; 8-26)        | 2.7 (3; 2-3)            |
| Obsessive Compulsive Disorder (OCD)    | 0.2                   | 0.1 - 0.2   | 14.5 (12; 6-21)        | 3.4 (3; 2-4)            |

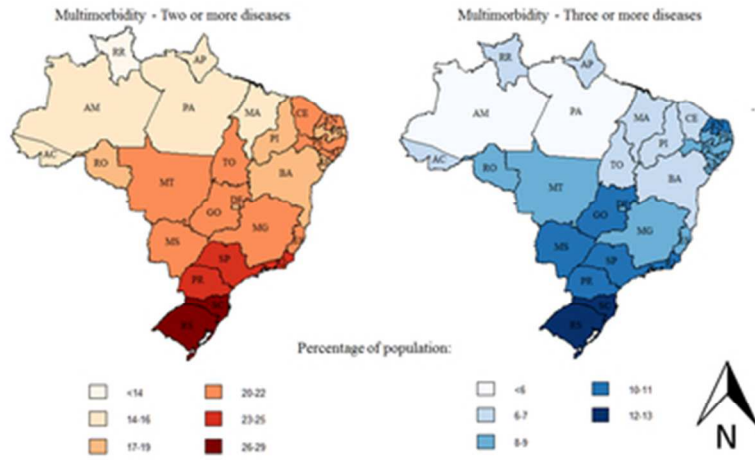

Multimorbidity frequency by Brazilian states. Brazil, 2013

39x21mm (300 x 300 DPI)

review only

1  
2  
3  
4  
5  
6  
7  
8  
9  
10  
11  
12  
13  
14  
15  
16  
17  
18  
19  
20  
21  
22  
23  
24  
25  
26  
27  
28  
29  
30  
31  
32  
33  
34  
35  
36  
37  
38  
39  
40  
41  
42  
43  
44  
45  
46  
47  
48  
49  
50  
51  
52  
53  
54  
55  
56  
57  
58  
59  
60

1  
2  
3  
4  
5  
6  
7  
8  
9  
10  
11  
12  
13  
14  
15  
16  
17  
18  
19  
20  
21  
22  
23  
24  
25  
26  
27  
28  
29  
30  
31  
32  
33  
34  
35  
36  
37  
38  
39  
40  
41  
42  
43  
44  
45  
46  
47  
48  
49

Multimorbidity - Two or more diseases

Multimorbidity - Three or more diseases

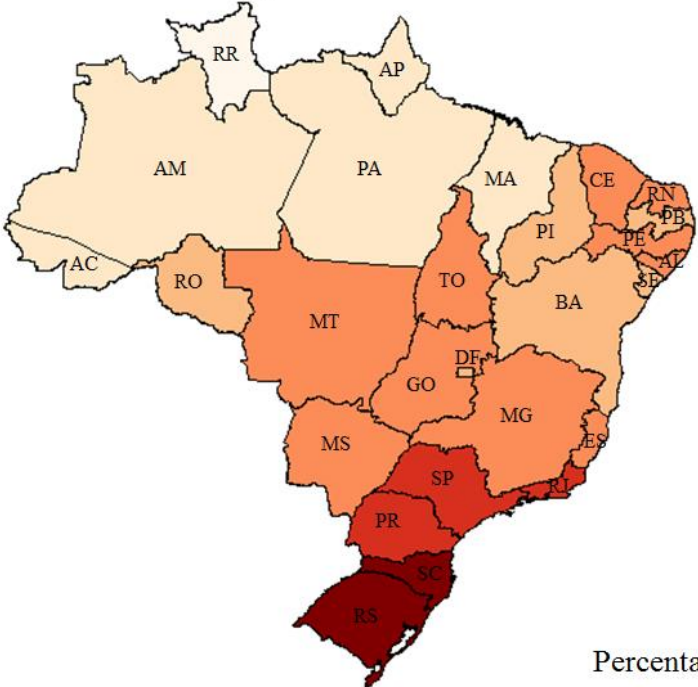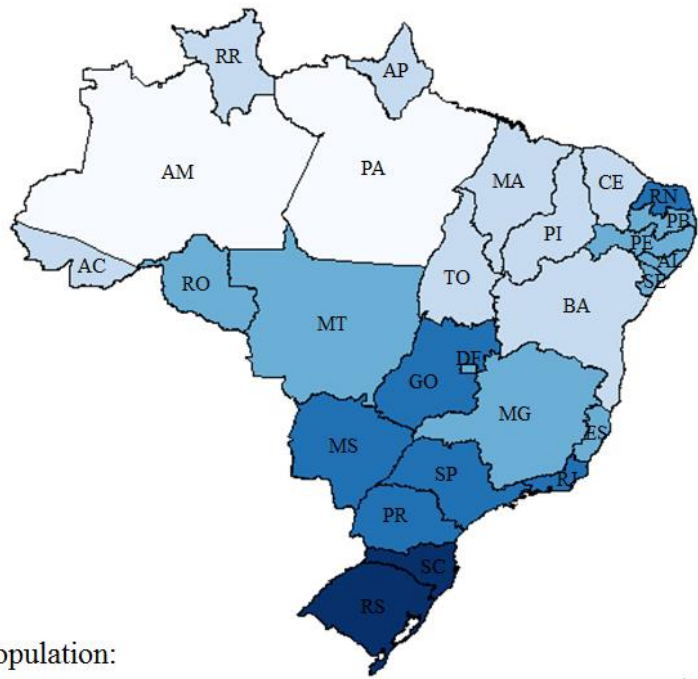

Percentage of population:

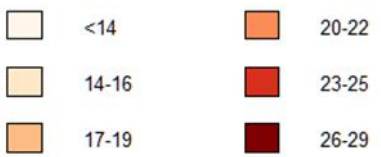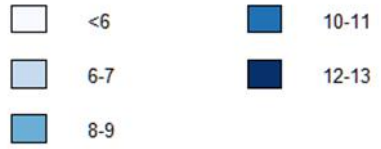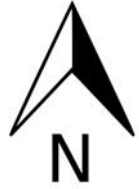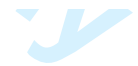

Supplementary table 2. Factor analysis. Brazil, 2013.

| Morbidities                            | Factor 1    | Factor 2    |
|----------------------------------------|-------------|-------------|
| High Blood Pressure                    | 0.77        |             |
| Heart attack                           | 0.79        |             |
| Angina                                 | 0.68        |             |
| Heart failure                          | 0.69        |             |
| Stroke                                 | 0.58        |             |
| Hypercholesterolemia                   | 0.57        |             |
| Diabetes                               | 0.62        |             |
| Arthritis/rheumatism                   | 0.30        | 0.37        |
| Spinal column problem                  |             | 0.45        |
| Asthma/wheezy bronchitis               |             | 0.57        |
| COPD                                   |             | 0.63        |
| Work-related muscle-skeletal disorders |             | 0.45        |
| Depression                             |             | 0.46        |
| Bipolar disorder                       |             | 0.46        |
| Kidney problem                         |             | 0.31        |
| Cancer                                 | -           | -           |
| Eigenvalor                             | 4.46        | 1.11        |
| Explained variance %*                  | 0.73 (0.69) | 0.18 (0.47) |
| KMO                                    |             | 0.84        |

\*Before oblique rotation (after oblique rotation)

## STROBE Statement—checklist of items that should be included in reports of observational studies

|                              | Item No | Recommendation                                                                                                                                                                                                                                                                                                                                                                                                                                                         | Page |
|------------------------------|---------|------------------------------------------------------------------------------------------------------------------------------------------------------------------------------------------------------------------------------------------------------------------------------------------------------------------------------------------------------------------------------------------------------------------------------------------------------------------------|------|
| <b>Title and abstract</b>    | 1       | (a) Indicate the study's design with a commonly used term in the title or the abstract                                                                                                                                                                                                                                                                                                                                                                                 | 2    |
|                              |         | (b) Provide in the abstract an informative and balanced summary of what was done and what was found                                                                                                                                                                                                                                                                                                                                                                    | 2    |
| <b>Introduction</b>          |         |                                                                                                                                                                                                                                                                                                                                                                                                                                                                        |      |
| Background/rationale         | 2       | Explain the scientific background and rationale for the investigation being reported                                                                                                                                                                                                                                                                                                                                                                                   | 4    |
| Objectives                   | 3       | State specific objectives, including any prespecified hypotheses                                                                                                                                                                                                                                                                                                                                                                                                       | 4    |
| <b>Methods</b>               |         |                                                                                                                                                                                                                                                                                                                                                                                                                                                                        |      |
| Study design                 | 4       | Present key elements of study design early in the paper                                                                                                                                                                                                                                                                                                                                                                                                                | 5    |
| Setting                      | 5       | Describe the setting, locations, and relevant dates, including periods of recruitment, exposure, follow-up, and data collection                                                                                                                                                                                                                                                                                                                                        | 5    |
| Participants                 | 6       | (a) <i>Cohort study</i> —Give the eligibility criteria, and the sources and methods of selection of participants. Describe methods of follow-up<br><i>Case-control study</i> —Give the eligibility criteria, and the sources and methods of case ascertainment and control selection. Give the rationale for the choice of cases and controls<br><i>Cross-sectional study</i> —Give the eligibility criteria, and the sources and methods of selection of participants | 5    |
|                              |         | (b) <i>Cohort study</i> —For matched studies, give matching criteria and number of exposed and unexposed<br><i>Case-control study</i> —For matched studies, give matching criteria and the number of controls per case                                                                                                                                                                                                                                                 | -    |
| Variables                    | 7       | Clearly define all outcomes, exposures, predictors, potential confounders, and effect modifiers. Give diagnostic criteria, if applicable                                                                                                                                                                                                                                                                                                                               | 5-6  |
| Data sources/<br>measurement | 8*      | For each variable of interest, give sources of data and details of methods of assessment (measurement). Describe comparability of assessment methods if there is more than one group                                                                                                                                                                                                                                                                                   | 6    |
| Bias                         | 9       | Describe any efforts to address potential sources of bias                                                                                                                                                                                                                                                                                                                                                                                                              | 6    |
| Study size                   | 10      | Explain how the study size was arrived at                                                                                                                                                                                                                                                                                                                                                                                                                              | 5    |
| Quantitative variables       | 11      | Explain how quantitative variables were handled in the analyses. If applicable, describe which groupings were chosen and why                                                                                                                                                                                                                                                                                                                                           | 5-6  |
| Statistical methods          | 12      | (a) Describe all statistical methods, including those used to control for confounding                                                                                                                                                                                                                                                                                                                                                                                  | 6-7  |
|                              |         | (b) Describe any methods used to examine subgroups and interactions                                                                                                                                                                                                                                                                                                                                                                                                    | -    |
|                              |         | (c) Explain how missing data were addressed                                                                                                                                                                                                                                                                                                                                                                                                                            | -    |
|                              |         | (d) <i>Cohort study</i> —If applicable, explain how loss to follow-up was addressed<br><i>Case-control study</i> —If applicable, explain how matching of cases and controls was addressed<br><i>Cross-sectional study</i> —If applicable, describe analytical methods taking account of sampling strategy                                                                                                                                                              | 6    |
|                              |         | (e) Describe any sensitivity analyses                                                                                                                                                                                                                                                                                                                                                                                                                                  | -    |

| <b>Results</b>           |     |                                                                                                                                                                                                              |     |
|--------------------------|-----|--------------------------------------------------------------------------------------------------------------------------------------------------------------------------------------------------------------|-----|
| Participants             | 13* | (a) Report numbers of individuals at each stage of study—eg numbers potentially eligible, examined for eligibility, confirmed eligible, included in the study, completing follow-up, and analysed            | 8   |
|                          |     | (b) Give reasons for non-participation at each stage                                                                                                                                                         | -   |
|                          |     | (c) Consider use of a flow diagram                                                                                                                                                                           | -   |
| Descriptive data         | 14* | (a) Give characteristics of study participants (eg demographic, clinical, social) and information on exposures and potential confounders                                                                     | 8   |
|                          |     | (b) Indicate number of participants with missing data for each variable of interest                                                                                                                          | -   |
|                          |     | (c) <i>Cohort study</i> —Summarise follow-up time (eg, average and total amount)                                                                                                                             | -   |
| Outcome data             | 15* | <i>Cohort study</i> —Report numbers of outcome events or summary measures over time                                                                                                                          | -   |
|                          |     | <i>Case-control study</i> —Report numbers in each exposure category, or summary measures of exposure                                                                                                         | -   |
|                          |     | <i>Cross-sectional study</i> —Report numbers of outcome events or summary measures                                                                                                                           | 8   |
| Main results             | 16  | (a) Give unadjusted estimates and, if applicable, confounder-adjusted estimates and their precision (eg, 95% confidence interval). Make clear which confounders were adjusted for and why they were included | 8-9 |
|                          |     | (b) Report category boundaries when continuous variables were categorized                                                                                                                                    | 8-9 |
|                          |     | (c) If relevant, consider translating estimates of relative risk into absolute risk for a meaningful time period                                                                                             | -   |
| Other analyses           | 17  | Report other analyses done—eg analyses of subgroups and interactions, and sensitivity analyses                                                                                                               | -   |
| <b>Discussion</b>        |     |                                                                                                                                                                                                              |     |
| Key results              | 18  | Summarise key results with reference to study objectives                                                                                                                                                     | 11  |
| Limitations              | 19  | Discuss limitations of the study, taking into account sources of potential bias or imprecision. Discuss both direction and magnitude of any potential bias                                                   | 14  |
| Interpretation           | 20  | Give a cautious overall interpretation of results considering objectives, limitations, multiplicity of analyses, results from similar studies, and other relevant evidence                                   | 14  |
| Generalisability         | 21  | Discuss the generalisability (external validity) of the study results                                                                                                                                        | 14  |
| <b>Other information</b> |     |                                                                                                                                                                                                              |     |
| Funding                  | 22  | Give the source of funding and the role of the funders for the present study and, if applicable, for the original study on which the present article is based                                                | 15  |

\*Give information separately for cases and controls in case-control studies and, if applicable, for exposed and unexposed groups in cohort and cross-sectional studies.

**Note:** An Explanation and Elaboration article discusses each checklist item and gives methodological background and published examples of transparent reporting. The STROBE checklist is best used in conjunction with this article (freely available on the Web sites of PLoS Medicine at <http://www.plosmedicine.org/>, Annals of Internal Medicine at <http://www.annals.org/>, and Epidemiology at <http://www.epidem.com/>). Information on the STROBE Initiative is available at [www.strobe-statement.org](http://www.strobe-statement.org).

# BMJ Open

## Contextual and individual inequalities of multimorbidity in Brazilian adults: a cross-sectional national-based study

|                                 |                                                                                                                                                                                                                                                                                                                                                                                                                                                                                                                                                                                                                                                                                                                                                                                                                                                                                                                                                                                                                                                                 |
|---------------------------------|-----------------------------------------------------------------------------------------------------------------------------------------------------------------------------------------------------------------------------------------------------------------------------------------------------------------------------------------------------------------------------------------------------------------------------------------------------------------------------------------------------------------------------------------------------------------------------------------------------------------------------------------------------------------------------------------------------------------------------------------------------------------------------------------------------------------------------------------------------------------------------------------------------------------------------------------------------------------------------------------------------------------------------------------------------------------|
| Journal:                        | <i>BMJ Open</i>                                                                                                                                                                                                                                                                                                                                                                                                                                                                                                                                                                                                                                                                                                                                                                                                                                                                                                                                                                                                                                                 |
| Manuscript ID                   | bmjopen-2017-015885.R2                                                                                                                                                                                                                                                                                                                                                                                                                                                                                                                                                                                                                                                                                                                                                                                                                                                                                                                                                                                                                                          |
| Article Type:                   | Research                                                                                                                                                                                                                                                                                                                                                                                                                                                                                                                                                                                                                                                                                                                                                                                                                                                                                                                                                                                                                                                        |
| Date Submitted by the Author:   | 23-Apr-2017                                                                                                                                                                                                                                                                                                                                                                                                                                                                                                                                                                                                                                                                                                                                                                                                                                                                                                                                                                                                                                                     |
| Complete List of Authors:       | Nunes, BP; Universidade Federal de Pelotas, Department of Nursing<br>Chiavegatto Filho, Alexandre; Harvard School of Public Health, Society, Human Development and Health; Faculdade de Saúde Pública da Universidade de São Paulo, Departamento de Epidemiologia<br>Pati, Sanghamitra; Public Health Foundation of India, Indian Institute of Public Health Bhubaneswar; Sanghamitra Pati, Teixeira, Doralice; Secretaria Municipal da Saúde de São Paulo, São Paulo, Brasil<br>Flores, Thaynã; Federal University of Pelotas, Postgraduate Program of Epidemiology<br>Camargo-Figuera, Fabio Alberto; Universidad Industrial de Santander, School of Nursing<br>Munhoz, Tiago; Universidade Federal de Pelotas, Postgraduate Programme in Epidemiology<br>Thume, Elaine; Universidade Federal de Pelotas, Department of Nursing/Postgraduate Program of Nursing<br>Facchini, Luiz; Universidad Federal de Pelotas, Departamento de Medicina Social<br>Batista, Sandro Rogerio; Federal University of Goias, Department of Internal Medicine of Medical School |
| <b>Primary Subject Heading</b>: | Epidemiology                                                                                                                                                                                                                                                                                                                                                                                                                                                                                                                                                                                                                                                                                                                                                                                                                                                                                                                                                                                                                                                    |
| Secondary Subject Heading:      | Public health                                                                                                                                                                                                                                                                                                                                                                                                                                                                                                                                                                                                                                                                                                                                                                                                                                                                                                                                                                                                                                                   |
| Keywords:                       | Comorbidity, Multimorbidity, Chronic disease, Statistical disease clustering, Multilevel Analysis                                                                                                                                                                                                                                                                                                                                                                                                                                                                                                                                                                                                                                                                                                                                                                                                                                                                                                                                                               |
|                                 |                                                                                                                                                                                                                                                                                                                                                                                                                                                                                                                                                                                                                                                                                                                                                                                                                                                                                                                                                                                                                                                                 |

SCHOLARONE™  
Manuscripts

1  
2  
3  
4 **Title page**

5  
6 **Title:** Contextual and individual inequalities of multimorbidity in Brazilian adults: a cross-  
7  
8 sectional national-based study

9  
10 **Authors:** Bruno P Nunes<sup>1</sup>; Alexandre DP Chiavegatto-Filho<sup>2</sup>; Sanghamitra Pati<sup>3</sup>; Doralice S  
11 Cruz Teixeira<sup>4</sup>; Thaynã R Flores<sup>5</sup>; Fabio A Camargo-Figuera<sup>6</sup>; Tiago N Munhoz<sup>5</sup>; Elaine  
12 Thumé<sup>7</sup>; Luiz A Facchini<sup>5,7</sup>; Sandro R Rodrigues Batista<sup>8</sup>

13  
14  
15  
16 1 – Department of Nursing, Federal University of Pelotas, Brazil

17  
18 2 – Department of Epidemiology, School of Public Health, University of São Paulo,  
19 São Paulo, Brazil

20  
21 3 – Indian Institute of Public, Health, Bhubaneswar, Public Health Foundation of  
22 India, Bhubaneswar, Odisha, India

23  
24 4 – Municipal Health Department of São Paulo, São Paulo, Brasil.

25  
26 5 – Postgraduate Program in Epidemiology, Federal University of Pelotas, Pelotas,  
27 Brazil

28  
29 6 – School of Nursing, Universidad Industrial de Santander, Bucaramanga, Colombia.

30  
31 7 – Postgraduate Program in Nursing, Federal University of Pelotas, Pelotas, Brazil

32  
33 8 – Faculty of Medicine, Federal University of Goiás, Goiânia, Brazil

34  
35  
36  
37  
38  
39  
40  
41  
42 **Correspondence to:** Bruno P Nunes, Department of Nursing, Federal University of Pelotas,  
43  
44 Gomes Carneiro, 1, Phone: +5553 3284-3820, Pelotas-RS, Brazil. Email:  
45  
46 [nunesbp@gmail.com](mailto:nunesbp@gmail.com)

47  
48  
49 **Key-words:** Comorbidity; Multimorbidity; Chronic disease; Statistical disease clustering;  
50  
51  
52 Multilevel Analysis.

53  
54  
55 **Word count:** 3137



1  
2  
3  
4 25 **Abstract**  
5  
6

7 **Objectives:** The study aims to evaluate the magnitude of multimorbidity in Brazilian adults,  
8  
9 as well to measure their association with individual and contextual factors stratified by  
10  
11 Brazilian states and regions.  
12

13  
14 **Methods:** A national-based cross-sectional study was carried out in 2013 with Brazilian  
15  
16 adults. Multimorbidity was evaluated by a list of 22 physical and mental morbidities (based  
17  
18 on self-reported medical diagnosis and Patient Health Questionnaire 9 for depression). The  
19  
20 outcome was analyzed taking  $\geq 2$  and  $\geq 3$  diseases as cut-off points. Factor analysis (FA) was  
21  
22 used to identify disease patterns and multilevel models were used to test association with  
23  
24 individual and contextual variables.  
25  
26  
27

28 **Results:** The sample was comprised of 60,202 individuals. Multimorbidity frequency was  
29  
30 22.2% (CI95% 21.5; 22.9) for  $\geq 2$  morbidities and 10.2% (CI95% 9.7; 10.7) for  $\geq 3$   
31  
32 morbidities. In the multilevel adjusted models, females, older people, those living with a  
33  
34 partner and having less schooling presented more multiple diseases. No linear association was  
35  
36 found according to wealth index but greater outcome frequency was found in individuals with  
37  
38 mid-range wealth index. Living in states with higher levels of education and wealthier states  
39  
40 was associated with greater multimorbidity. Two patterns of morbidities (cardiometabolic  
41  
42 problems and Respiratory/mental/muscle-skeletal disorders) explained 92% of total variance.  
43  
44 The relationship of disease patterns with individual and contextual variables was similar to  
45  
46 the overall multimorbidity, with differences among Brazilian regions.  
47  
48  
49

50  
51 **Conclusions:** In Brazil, at least 19 million adults had multimorbidity. Frequency is similar to  
52  
53 that found in other LMIC. Contextual and individual social inequalities were observed.  
54  
55  
56  
57  
58  
59  
60

1  
2  
3  
4 47 **Strengths and limitations of this study**  
5  
6

- 7 48 • Comprehensive information about multimorbidity is still scarce in Brazil  
8  
9 49 • As far as we are aware, this is among the first information about multimorbidity  
10  
11 assessment of individual and contextual factors in a sample representative of the  
12  
13 whole of Brazil  
14  
15 52 • Multimorbidity is a challenge to the Brazilian health system due to its high frequency  
16  
17 (two in every ten adults had  $\geq 2$  diseases and one in every ten had  $\geq 3$  diseases,  
18  
19 representing at least 19 million Brazilians) and the interplay of individual and  
20  
21 contextual characteristics associated with the problem. Differences within the country  
22  
23 were observed.  
24  
25 56 • Except for depression, other morbidities were evaluated by self-reporting and we are  
26  
27 not able to evaluate the contextual determinants at neighborhood level  
28  
29  
30  
31  
32  
33  
34  
35  
36  
37  
38  
39  
40  
41  
42  
43  
44  
45  
46  
47  
48  
49  
50  
51  
52  
53  
54  
55  
56  
57  
58  
59  
60

## 59 **Introduction**

60 Multimorbidity is a current and worldwide public health problem mainly due to its high  
61 frequency (>60% in adults) and its association with negative outcomes [1-4]. Most evidence  
62 is from High Income Countries [4] but results from Low and Middle Income Countries  
63 (LMIC) are also available and increasing in the literature [5-8], including epidemiological  
64 information about multimorbidity in Brazilian cities [9-11].

65 Similar to international evidence, multimorbidity in Brazil is greater in females and increases  
66 according to age. Socioeconomic inequalities are also observed mainly related to educational  
67 differences whereas multiple disease is more frequent in adults and elderly with less  
68 schooling and lower socioeconomic status [10 11].

69 However, as far as we are aware, Brazilian evidence on multimorbidity for the entire country  
70 is scarce. Only recently, a paper evaluating epidemiology of multimorbidity in Brazil was  
71 published [12]. The authors found a 24.2% (95% CI 23.5–24.9) prevalence rate of  
72 multimorbidity [12] and correlates were similar to Brazilian located previous studies ([10  
73 11].

74 Brazil is the 5<sup>th</sup> most populous country in the world with more than 200 million people.  
75 Furthermore, it is marked by historic social inequalities in different health aspects comprising  
76 the occurrence of chronic diseases including both physical and mental disorders [13-15].

77 Understanding the occurrence and patterns of multimorbidity in the whole country can be  
78 relevant for Brazilian Unified Health System management of the challenges resulting from the  
79 rapid demographic and epidemiological transitions that have occurred in recent years.

80 Additionally, identifying and comprehending the contextual and individual differences

1  
2  
3  
4 81 surrounding multimorbidity occurrence helps policy-makers to prioritize and promote health  
5  
6 82 actions and interventions related to multimorbidity management.  
7  
8  
9 83 Thus, the aim of this study was to evaluate the frequency and patterns of multimorbidity in  
10  
11 84 Brazilian adults, as well to measure their association with individual and contextual factors  
12  
13  
14 85 stratified by Brazilian states and regions.  
15  
16  
17  
18  
19  
20  
21  
22  
23  
24  
25  
26  
27  
28  
29  
30  
31  
32  
33  
34  
35  
36  
37  
38  
39  
40  
41  
42  
43  
44  
45  
46  
47  
48  
49  
50  
51  
52  
53  
54  
55  
56  
57  
58  
59  
60

1  
2  
3  
4  
5  
6  
7  
8  
9  
10  
11  
12  
13  
14  
15  
16  
17  
18  
19  
20  
21  
22  
23  
24  
25  
26  
27  
28  
29  
30  
31  
32  
33  
34  
35  
36  
37  
38  
39  
40  
41  
42  
43  
44  
45  
46  
47  
48  
49  
50  
51  
52  
53  
54  
55  
56  
57  
58  
59  
60

## 86 **Methods**

87 This was a cross-sectional study using population-based data from the Brazilian National  
88 Health Survey (*Pesquisa Nacional de Saúde - PNS*) carried out in Brazil in 2013. The survey  
89 was conducted by *Instituto Brasileiro de Geografia e Estatística (IBGE)* and the Ministry of  
90 Health. The sample is representative of people living in permanent housing, located in urban  
91 or rural areas, covering the country's five major geographical regions, its 26 states and  
92 Federal District.

93 Sampling was done in three stages, the first being the selection of census tracts, followed by  
94 households and, finally, individuals aged 18 or over. More details about the sampling process  
95 can be found elsewhere[16 17].

96 Multimorbidity was evaluated by using a list of all 22 self-reported morbidities available in  
97 the study, 21 of which were based on self-reported medical diagnosis, while depression was  
98 based on the Patient Health Questionnaire-9(PHQ-9)[18]. The question applied to measure  
99 each disease based on self-reported medical diagnosis was: "*Has any physician already*  
100 *diagnosed you as having [each disease]?*". The following morbidities were included: High  
101 Blood Pressure - HBP; Spinal column problem; Hypercholesterolemia; Depression; Diabetes;  
102 Arthritis/rheumatism; Asthma/wheezy bronchitis; Work-related muscle-skeletal disorders;  
103 Cancer; Other heart disease; Stroke; Kidney problem; Heart attack; Heart failure; Bronchitis;  
104 Angina; Emphysema; Other lung disease; Bipolar disorder; Other mental disease;  
105 Schizophrenia; and Obsessive Compulsive Disorder (OCD). Multimorbidity was evaluated by  
106 two cut-off points as per the literature[4 19]:  $\geq 2$  and  $\geq 3$  morbidities. Women who had HBP or  
107 diabetes only during pregnancy were considered as not having these diseases.

1  
2  
3  
4 108 Independent variables were sex (male; female), age (continuous), skin color (white; black;  
5  
6 109 and brown - Asian-Brazilian and indigenous were not shown because they represented less  
7  
8 110 than 1.6% of the sample), marital status (without partner; with partner), schooling in years (0:  
9  
10 111 No schooling; 1-8: incomplete primary school; 8-11: complete primary school and incomplete  
11  
12 112 secondary school; ≥12: complete secondary school up to complete higher education), wealth  
13  
14 113 index in quintiles (based on ownership of bathroom, car, motorcycle, refrigerator, washing  
15  
16 114 machine, DVD player, TV, landline telephone, microcomputer and microwave oven), private  
17  
18 115 health plan (no; yes), geographical area (urban; rural); state-level education in terciles –  
19  
20 116 proportion of literacy rate obtained from IBGE, 2010 and state-level income in terciles  
21  
22 117 (nominal income per capita - average monthly value - in permanent private housing obtained  
23  
24 118 from IBGE, 2010).

25  
26  
27  
28  
29 119 Statistical analyses were performed using Stata 12.1 software and the *svy* command was used,  
30  
31 120 which takes into consideration sample weights. Sample weights were defined for the primary  
32  
33 121 sampling units, households and all inhabitants, as well as for the selected inhabitant.

34  
35  
36 122 Complete information about PNS sample weights and sampling process have been published  
37  
38 123 elsewhere [16 17]. The results from the sample were expanded for the Brazilian population.

39  
40  
41 124 Descriptive analysis was based on the calculation of prevalence and its respective confidence  
42  
43 125 intervals. Factor analysis (FA) was performed to identify patterns of morbidities[20]. This  
44  
45 126 analysis was based on tetrachoric correlation, this being more appropriate than Pearson's  
46  
47 127 correlation for dichotomous variables [21]. Before FA analysis, Kaiser-Meyer-Olkin (KMO)  
48  
49 128 and Bartlett sphericity tests were used to evaluate the applicability of this approach. After the  
50  
51 129 first evaluation of the model, some variables were encompassed (bronchitis, emphysema and  
52  
53 130 other lung disease to other respiratory problems - COPD) and others excluded (schizophrenia,  
54  
55 131 Obsessive Compulsive Disorder, another mental disease and another heart disease) in order to  
56  
57  
58  
59  
60

1  
2  
3  
4 132 obtain a better model fit regarding KMO and Bartlett sphericity tests. Oblique (oblimin or  
5  
6 133 promax) rotation was performed. In order to establish the number of components to be  
7  
8 134 retained, we used Cattell graphics, Kaiser criteria (eigenvalue>1) and minimum explained  
9  
10 135 variance (>10% for each component). Variables with loadings  $\geq 0.3$  were kept [22]. Through  
11  
12 136 factorial analysis, we obtained the predicted scores of morbidities (factors).

13  
14  
15  
16 137 Multilevel models were performed to account for state-level variance, with the individuals as  
17  
18 138 the first level and the state of residence as the second level. First, the models were initially  
19  
20 139 adjusted without inclusion of the independent variables (null model) to test the initial variance  
21  
22 140 attributable to the state accounting for approximately 1% ( $p < 0.05$ ) of variance for the four  
23  
24 141 analyses (Multimorbidity  $\geq 2$ ; Multimorbidity  $\geq 3$ , factor 1 and factor 2). Then, we performed a  
25  
26 142 logistic regression model for multimorbidity ( $\geq 2$  and  $\geq 3$  morbidities) and linear regression  
27  
28 143 models to evaluate the association of factors (patterns) of diseases and independent variables.  
29  
30 144 We included sex, age, skin color, marital status, schooling in years, private health plan,  
31  
32 145 geographical area, state-level education and income in these models. Stratified region-level  
33  
34 146 analyzes were performed to better understanding disparities among states.

35  
36  
37  
38  
39 147 The study was approved by the National Research Ethics Commission on July 8, 2013, under  
40  
41 148 No. 10853812.7.0000.0008. All respondents signed a free and informed consent statement  
42  
43 149 form prior to data collection  
44  
45  
46  
47  
48  
49  
50  
51  
52  
53  
54  
55  
56  
57  
58  
59  
60

1  
2  
3  
4 150 **Results**

5  
6  
7 151 The sample was comprised of 60,202 adults. The most frequent diseases were High Blood  
8  
9 152 Pressure (22.3%) and Spinal column problem (19.0%). Angina, emphysema, other lung  
10  
11 153 disease, bipolar disorder, other mental disease, schizophrenia and Obsessive Compulsive  
12  
13 154 Disorder (OCD) were present in less than 1% of the sample. Lung disease problems showed,  
14  
15 155 on average, longer duration of disease. Greater comorbidities were observed for individuals  
16  
17 156 with health problems (heart attack; heart failure and angina). The mean range of comorbidities  
18  
19 157 was from 2.3 to 4.5 diseases (Supplementary table 1).

20  
21  
22  
23 158 Females comprised 55.1% of the sample and mean age was 43.7 years (SD=17.0), ranging  
24  
25 159 from 18 to 101. Most individuals reported white skin color (47.8%) followed by brown  
26  
27 160 (41.7%). Almost two thirds lived with a partner. Out of the total sample, 45.2% had  $\geq 12$  years  
28  
29 161 of schooling and 13.9% had zero schooling. Less than one third had a private health plan and  
30  
31 162 13.5% lived in rural areas (Table 1). The mean average proportion of literacy rate at the state-  
32  
33 163 level was 7.3%, ranging from 3.3% to 22.5%. The average monthly value of nominal income  
34  
35 164 per capita was R\$ 1,069 (approximately US\$ 644 in 2010).

36  
37  
38  
39 165 The occurrence of multimorbidity was 22.2% (CI95% 21.5; 22.9) for  $\geq 2$  morbidities and  
40  
41 166 10.2% (CI95% 9.7; 10.7) for  $\geq 3$  morbidities. Irrespective of cut-off point, multimorbidity was  
42  
43 167 higher in females, older people, individuals reporting white skin color, who lived with a  
44  
45 168 partner, had less schooling, had a private health plan and living in urban areas. At state-level,  
46  
47 169 multimorbidity was more frequent in states with higher education levels and wealthier states  
48  
49 170 (Table 1). States in the South of Brazil showed the highest occurrence of multimorbidity  
50  
51 171 (Supplementary figure 1),  
52  
53  
54  
55  
56  
57  
58  
59  
60



1  
2  
3  
4 172 In the adjusted multilevel models, females had 1.86 (CI95% 1.78; 1.95) and 1.97(CI95%  
5  
6 173 1.85; 2.10) more odds of multimorbidity than males, for  $\geq 2$  and  $\geq 3$  morbidities, respectively.  
7  
8 174 In all cases, every additional year of age increased by 1.06 times the odds of multiples  
9  
10 175 diseases. Self-reported skin color was not associated with multimorbidity in the adjusted  
11  
12 176 models. On average, living with a partner increased by 1.15 times the odds of the outcome.  
13  
14 177 Compared to individuals with  $\geq 12$  years of schooling, adults with 1-8 years of schooling had  
15  
16 178 more odds of multimorbidity (OR 1.40 - CI95% 1.32; 1.49, for  $\geq 2$  diseases and OR 1.58  
17  
18 179 CI95% 1.45; 1.72, for  $\geq 3$  morbidities). In general, adults in the second and third wealthiest  
19  
20 180 quintiles had greater odds of multimorbidity. Individuals with private health plans and who  
21  
22 181 lived in urban areas had greater odds of multiple diseases. Individuals who lived in states with  
23  
24 182 low and middle education levels had less multimorbidity compared to states with high  
25  
26 183 education levels. With regard to income at state-level, the higher multimorbidity difference  
27  
28 184 was demonstrated simply by comparing low with high income states (Table 2). The  
29  
30 185 associations stratified by region revealed a similar pattern to the whole Brazil, except to  
31  
32 186 Central Western region in relation to lack of association of overall multimorbidity and private  
33  
34 187 health plan, geographical area (observed to Southeastern region too) and schooling (no dose-  
35  
36 188 response relationship) (Table 3).  
37  
38  
39  
40  
41  
42 189 In the FA analysis, the KMO coefficient was 0.84. Two patterns of morbidities explained  
43  
44 190 92% of total variance, after rotation. The two components identified were: (1)  
45  
46 191 cardiometabolic problems (High Blood Pressure, heart attack, angina, heart failure, stroke,  
47  
48 192 hypercholesterolemia, diabetes and arthritis/rheumatism); (2) Respiratory/mental/muscle-  
49  
50 193 skeletal disorders (arthritis/rheumatism, spinal column problem, asthma/wheezy bronchitis,  
51  
52 194 COPD, work-related muscle-skeletal disorders, depression, bipolar disorder and kidney  
53  
54 195 problem) (Supplementary table 2).  
55  
56  
57  
58  
59  
60

1  
2  
3  
4 196 The adjusted multilevel analyses of the two factors are presented in Table 4. Overall, the  
5  
6 197 results were similar to those observed in Table 2. Females, older people, those with less  
7  
8 198 schooling, those with intermediate asset ownership quintiles and who had private health plans  
9  
10 199 showed more burden of factors. People who lived in rural geographical areas showed less  
11  
12 200 burden of the cardiometabolic factor. Individuals with partners presented less burden of the  
13  
14 201 Respiratory/mental/muscle-skeletal factor compared to individuals who did not have a  
15  
16 202 partner. Cardiometabolic and Respiratory/mental/muscle-skeletal factors were greater when  
17  
18 203 state-level education and income were lower. The cardiometabolic factor presented similar  
19  
20 204 associations as overall multimorbidity to stratified analysis. As for the Respiratory/mental/  
21  
22 205 muscle-skeletal factor did not show association with schooling in all regions (except to  
23  
24 206 Northern) (Table 5).  
25  
26  
27  
28  
29  
30  
31  
32  
33  
34  
35  
36  
37  
38  
39  
40  
41  
42  
43  
44  
45  
46  
47  
48  
49  
50  
51  
52  
53  
54  
55  
56  
57  
58  
59  
60

1  
2  
3  
4 208 **Discussion**  
5

6  
7 209 Multimorbidity frequency in Brazil is considerable; one in every five Brazilian adults had two  
8  
9 210 or more morbidities and one in every ten had three or more morbidities. Individual and state-  
10  
11 211 level inequalities suggest the complexity of factors and their relationship with multimorbidity  
12  
13 212 occurrence. To our knowledge, this is the first representative Brazilian study to consider  
14  
15 213 individual and contextual factors associated with multimorbidity and its clusters.  
16  
17

18  
19 214 The study's national representativeness enables us to extrapolate frequencies for the whole  
20  
21 215 Brazilian adult population. Considering 190,755,799 million adults in the most recent  
22  
23 216 Brazilian population census (2010), we are able to infer that approximately 42.7 and 19.5  
24  
25 217 million Brazilian adults had two or more and three or more diseases, respectively. These  
26  
27 218 results bring important challenges for the health system which will need to be more  
28  
29 219 comprehensive in order to deal with the complexity of multimorbidity. Some of the issues are  
30  
31 220 related to need to include multimorbidity in guidelines on reporting these problems to health  
32  
33 221 professionals, as well as giving more emphasis to multimorbidity on health-related university  
34  
35 222 curricula.  
36  
37

38  
39 223 Relative comparisons with Western countries reveal similar occurrence of two or more  
40  
41 224 diseases in Spain [23] (20.0%; CI95%: 18.8-21.2) and almost ten percentage points less than  
42  
43 225 in Scotland [24] (31.1%, 25 or more years) and Canada[25] (30.9%; CI95% 29.5 – 32.4).In  
44  
45 226 low and middle income countries (LMIC), estimates from countries (China, Ghana, India,  
46  
47 227 Mexico, Russia, and South Africa) included in the WHO Study on global AGEing and adult  
48  
49 228 health (SAGE) Wave-1 (2007/10), found 21.9% (CI95%: 20.9; 22.9) of multimorbidity  
50  
51 229 occurrence ( $\geq 2$  diseases from a list from eight morbidities)[5]. This occurrence varied from  
52  
53 230 20.3% in China to 34.7% in Russia. In the present analysis, we used more diseases to  
54  
55  
56  
57  
58  
59  
60

1  
2  
3  
4 231 construct multimorbidity (22 against eight in SAGE study). Even so, the prevalence found  
5  
6 232 was, virtually, equal to these other LMIC countries, except for Russia.  
7  
8

9 233 In Brazil, our occurrence findings were slightly lower than the result found in a paper with  
10  
11 234 same database (-2 pp). Furthermore, the authors found three clusters which differ of our  
12  
13 235 results (n=2) despite the resemblance of diseases grouping[12]. These variations are explained  
14  
15 236 by the differences among diseases selected to measure multimorbidity and analysis steps to  
16  
17 237 obtain the clusters. The standardization of multimorbidity operationalization is an urgent call  
18  
19 238 to avoid loss of consistency in the development of the area [4]. Comparing with  
20  
21 239 geographically located Brazilian results, our prevalence were lower than frequencies found  
22  
23 240 in a Southern Brazilian city (29.1%; CI95%: 27.1; 31.1 for  $\geq 2$  morbidities, and 14.3 %;  
24  
25 241 CI95%: 12.8; 15.8 for  $\geq 3$  morbidities) despite the higher number of morbidities included in  
26  
27 242 this study [10]. The difference observed may be attributed to socioeconomic characteristics of  
28  
29 243 Brazilian states. The states further South presented more development, wealth (both income  
30  
31 244 and schooling) and higher life expectancy compared to other states [13] which tend to  
32  
33 245 increase the occurrence of multimorbidity at contextual level.  
34  
35  
36  
37

38 246 In terms of socio-demographic characteristics, females and older adults presented more  
39  
40 247 multimorbidity in all Brazilian regions as found in previous Brazilian [10 11] and  
41  
42 248 international studies [26 27]. Women tend to use health services more and to live longer than  
43  
44 249 males, these being factors which explain part of the higher frequency in this group. Survivors  
45  
46 250 older adults tend to be exposed to more physiological damages in lifetime that contribute to  
47  
48 251 chronic disease incidence [28]. In the same way, individuals who had partners had higher  
49  
50 252 multimorbidity except to Central Western residents. The association between marital status  
51  
52 253 should be more understanding through studies which include cultural assessment and its  
53  
54 254 impact on chronic diseases development and diagnosis. One explanation is related to the fact  
55  
56  
57  
58  
59  
60

1  
2  
3  
4 255 that individuals with partner tend to use more health services increasing the probability of  
5  
6 256 medical diagnosis [29].  
7

8  
9 257 Regarding socioeconomic variables at individual level, our results follow the pattern found in  
10  
11 258 overall analysis of a worldwide study [27] and LMIC included in the SAGE study.  
12

13 259 Multimorbidity and its factors was not associated with wealth quintiles but presented  
14  
15 260 association with education [5] regardless Brazilian regions. In the present analysis, the middle  
16  
17 261 wealth quintile strata and their clusters present more multimorbidity whilst showing a  
18  
19 262 negative dose-response relationship with education. These results may be explained by a  
20  
21 263 strong relationship between educational attainment and all aspects of healthier life including  
22  
23 264 those mainly related to better awareness of chronic disease risk factors [30 31]. Education  
24  
25 265 level seems to be a more adequate socioeconomic indicator to evaluate multimorbidity  
26  
27 266 inequalities due to its worldwide association with poor health outcomes and longevity, and the  
28  
29 267 persistent effect overtime [30]. Except for the early effect of childhood health status on  
30  
31 268 education [32 33], chronic diseases in adult life tend to increase the risk of poverty (wealth  
32  
33 269 index) [34] but the effect on education tend to be less relevant since education is usually  
34  
35 270 achieved is early life  
36  
37  
38  
39

40 271 Having private health plans was associated with multimorbidity and its factors, except to  
41  
42 272 Central Western and Southern. This may be explained, by the relationship with self-reported  
43  
44 273 diagnosis (a fundamental characteristic of the outcome). Individuals with health plans tend to  
45  
46 274 use health services more frequently regardless the presence of chronic conditions[35 36] thus  
47  
48 275 affording more diagnosis.  
49

50  
51  
52 276 Individuals who lived in urban areas presented more multiple diseases. This was similar to  
53  
54 277 results found in the adult population in South Africa [37] and Catalonia (Spain)[38]. In spite  
55  
56  
57  
58  
59  
60

1  
2  
3  
4 278 of little Brazilian evidence on the topic, as well as the social, cultural and environment  
5  
6 279 differences between rural-urban residents, people from rural areas had more difficulty in  
7  
8 280 accessing health services in Brazil [39] which may explain partially the differences between  
9  
10 281 rural and urban residents in our results of the occurrence of self-reported medical diagnosis of  
11  
12 282 multiple diseases.

13  
14  
15 283 The state-level differences observed reveal a paradoxical association. Instead of individual  
16  
17 284 inequalities are pro-rich, state-level differences are pro-poor. These results might be explained  
18  
19 285 by demographic differences between states in Brazil which may not be fully adjusted with  
20  
21 286 individual demographic variables included in the analysis. Low income and low education in  
22  
23 287 Brazilian states are concentrated in North and Northeast regions and show the poorest health-  
24  
25 288 related indicators[13]. The states further south (*Rio Grande do Sul* - 27.2% and *Santa*  
26  
27 289 *Catarina* - 27.1%) present greater multimorbidity frequencies.

28  
29  
30  
31  
32 290 The two factors (cardiometabolic and respiratory/mental/muscle-skeletal) found have some  
33  
34 291 similarity to recent evidence [40 41] mainly related to cardiometabolic patterns. The  
35  
36 292 respiratory/mental/muscle-skeletal data found was similar to results found in a worldwide  
37  
38 293 study of people aged 50 or over [42]. The majority of studies, especially with adult  
39  
40 294 populations, found two or three patterns of diseases. These combinations of diseases suggest  
41  
42 295 possible causal relationship between diseases or their risk factors [20]. The cardiometabolic  
43  
44 296 pattern showed a more well know relationship between diseases. On the other hand, the  
45  
46 297 relationship between respiratory, mental and muscle-skeletal disorders is less understood. The  
47  
48 298 concomitant occurrence of these diseases is well described [43] but understanding the  
49  
50 299 biological plausibility of causal relationships will be a challenge for new studies. As a first  
51  
52 300 step, more detailed and specific information about onset of diseases will be needed. At the  
53  
54 301 same time, the use of approaches related to network analysis can be useful for a better  
55  
56  
57  
58  
59  
60

1  
2  
3  
4 302 understanding of causal relationships [44]. Even so, the results presented here may contribute  
5  
6 303 to the inclusion of recommendations in Brazilian clinical guidelines about the relationship  
7  
8 304 with chronic conditions, as well as to designing interventions/public policies considering the  
9  
10 305 presence of multiple diseases in the same individual.  
11

12  
13 306 Some limitations of the study should be addressed. With the exception of depression, all the  
14  
15 307 other morbidities were evaluated by self-reporting. This may provide a misclassification bias  
16  
17 308 even though self-reported diagnosis is considered an adequate and common source of  
18  
19 309 information used in population-based studies on multimorbidity [4 45 46]. Nevertheless, the  
20  
21 310 lack of adequate information about diagnosis, including longitudinal information, limits the  
22  
23 311 causal inference related to concomitant diseases expressed in factorial analysis. Furthermore,  
24  
25 312 we are not able to evaluate the contextual determinants at neighborhood level which may  
26  
27 313 produce more complete associations with state-level differences.  
28

29  
30  
31 314 The absolute and relative number of Brazilian individuals with multimorbidity was high.  
32  
33 315 Addressing the complexity of multiple disease management for at least 19 million people will  
34  
35 316 be a challenge for the health system. The clusters of diseases identified might contribute to  
36  
37 317 strategies for the prevention and clinical care of these diseases. State and individual-level  
38  
39 318 inequalities increase the problem reinforcing the need of a wide lens to organize health  
40  
41 319 services and to decrease the inequities among the Brazilian population.  
42  
43  
44  
45  
46  
47  
48  
49  
50  
51  
52  
53  
54  
55  
56  
57  
58  
59  
60

1  
2  
3  
4 320 **Author contributions**

5  
6 321 BPN designed the article, obtained and analyzes the data, drafted the first version and revised  
7  
8 322 the manuscript. ADPCF and FACF analyzed the data, and drafted and revised the manuscript.  
9  
10 323 SP, DS, TRF, TNM, ET and LAF drafted and revised the manuscript. SBR designed the  
11  
12 324 article, drafted and revised the manuscript. All authors approved the final version of the  
13  
14 325 manuscript.

15 326 **Funding:** There are no funding related to the production of the paper. The Brazilian Ministry  
16  
17 327 of Health financed the PNS survey. The funder of the survey played no role in the study  
18  
19 328 design; collection, analysis, and interpretation of data; writing of the report; or the decision to  
20  
21 329 submit the article for publication.

22 330 **Conflict of interest:** All authors have no potential conflicts.

23  
24 331 **Data sharing statement:** All PNS data are available from the Brazilian Institute of  
25  
26 332 Geography and Statistics website, located here:  
27 333 [http://www.ibge.gov.br/home/estatistica/populacao/pns/2013/default\\_microdados.shtm](http://www.ibge.gov.br/home/estatistica/populacao/pns/2013/default_microdados.shtm).

28 334  
29  
30  
31  
32  
33  
34  
35  
36  
37  
38  
39  
40  
41  
42  
43  
44  
45  
46  
47  
48  
49  
50  
51  
52  
53  
54  
55  
56  
57  
58  
59  
60



335 **References**

- 336 1. Ryan A, Wallace E, O'Hara P, et al. Multimorbidity and functional decline in community-dwelling  
337 adults: a systematic review. *Health and quality of life outcomes* 2015;**13**(1):1-13 doi:  
338 10.1186/s12955-015-0355-9[published Online First: Epub Date]].
- 339 2. Fortin M, Lapointe L, Hudon C, et al. Multimorbidity and quality of life in primary care: a systematic  
340 review. *Health and quality of life outcomes* 2004;**2**:51 doi: 10.1186/1477-7525-2-  
341 51[published Online First: Epub Date]].
- 342 3. Nunes BP, Flores TR, Mielke GI, et al. Multimorbidity and mortality in older adults: A systematic  
343 review and meta-analysis. *Arch Gerontol Geriatr* 2016;**67**:130-38 doi:  
344 10.1016/j.archger.2016.07.008[published Online First: Epub Date]].
- 345 4. Fortin M, Stewart M, Poitras ME, et al. A systematic review of prevalence studies on  
346 multimorbidity: toward a more uniform methodology. *Annals of family medicine*  
347 2012;**10**(2):142-51 doi: 10.1370/afm.1337[published Online First: Epub Date]].
- 348 5. Arokiasamy P, Uttamacharya U, Jain K, et al. The impact of multimorbidity on adult physical and  
349 mental health in low- and middle-income countries: what does the study on global ageing  
350 and adult health (SAGE) reveal? *BMC Med* 2015;**13**:178 doi: 10.1370/afm.1843  
351 10.1186/s12916-015-0402-8[published Online First: Epub Date]].
- 352 6. Pati S, Agrawal S, Swain S, et al. Non communicable disease multimorbidity and associated health  
353 care utilization and expenditures in India: cross-sectional study. *BMC health services research*  
354 2014;**14**:451 doi: 10.1186/1472-6963-14-451[published Online First: Epub Date]].
- 355 7. Pati S, Swain S, Hussain MA, et al. Prevalence, correlates, and outcomes of multimorbidity among  
356 patients attending primary care in Odisha, India. *BMJ Open* 2015;**13**(5):446-50 doi:  
357 10.1136/bmjopen-2014-007235  
358 10.1370/afm.1843[published Online First: Epub Date]].
- 359 8. Pati S, Swain S, Hussain MA, et al. Prevalence and outcomes of multimorbidity in South Asia: a  
360 systematic review. 2015;**5**(10):e007235 doi: 10.1136/bmjopen-2014-007235[published  
361 Online First: Epub Date]].
- 362 9. Andrade LH, Bensenor IM, Viana MC, et al. Clustering of psychiatric and somatic illnesses in the  
363 general population: multimorbidity and socioeconomic correlates. *Braz J Med Biol Res*  
364 2010;**43** doi: 10.1590/s0100-879x2010007500024[published Online First: Epub Date]].
- 365 10. Nunes BP, Camargo-Figuera FA, Guttier M, et al. Multimorbidity in adults from a southern  
366 Brazilian city: occurrence and patterns. *International journal of public health* 2016 doi:  
367 10.1007/s00038-016-0819-7[published Online First: Epub Date]].
- 368 11. Nunes BP, Thume E, Facchini LA. Multimorbidity in older adults: magnitude and challenges for the  
369 Brazilian health system. *BMC Public Health* 2015;**15**:1172 doi: 10.1186/s12889-015-2505-  
370 8[published Online First: Epub Date]].
- 371 12. Rzewuska M, de Azevedo-Marques JM, Coxon D, et al. Epidemiology of multimorbidity within the  
372 Brazilian adult general population: Evidence from the 2013 National Health Survey (PNS  
373 2013). *PLOS ONE* 2017;**12**(2):e0171813 doi: 10.1371/journal.pone.0171813[published Online  
374 First: Epub Date]].
- 375 13. Paim J, Travassos C, Almeida C, et al. The Brazilian health system: history, advances, and  
376 challenges. *The Lancet* 2011;**377**(9779):1778-97 doi: 10.1016/S0140-6736(11)60054-  
377 8[published Online First: Epub Date]].
- 378 14. Schmidt MI, Duncan BB, Azevedo e Silva G, et al. Chronic non-communicable diseases in Brazil:  
379 burden and current challenges. *Lancet* 2011;**377** doi: 10.1016/s0140-6736(11)60135-  
380 9[published Online First: Epub Date]].

- 1  
2  
3  
4 381 15. Andrade LH, Wang Y-P, Andreoni S, et al. Mental Disorders in Megacities: Findings from the São  
5 382 Paulo Megacity Mental Health Survey, Brazil. *PLoS ONE* 2012;**7**(2):e31879 doi:  
6 383 10.1371/journal.pone.0031879[published Online First: Epub Date]].  
7 384 16. Damacena GN, Szwarzwald CL, Malta DC, et al. The Development of the National Health Survey in  
8 385 Brazil, 2013. *Epidemiologia e Serviços de Saúde* 2015;**24**:197-206  
9 386 17. Souza-Júnior PRBd, Freitas MPSd, Antonaci GdA, et al. Sampling Design for the National Health  
10 387 Survey, 2013. *Epidemiologia e Serviços de Saúde* 2015;**24**:207-16  
11 388 18. Santos IS, Tavares BF, Munhoz TN, et al. Sensibilidade e especificidade do Patient Health  
12 389 Questionnaire-9 (PHQ-9) entre adultos da população geral. *Cadernos de Saúde Pública*  
13 390 2013;**29**:1533-43  
14 391 19. Harrison C, Britt H, Miller G, et al. Examining different measures of multimorbidity, using a large  
15 392 prospective cross-sectional study in Australian general practice. *BMJ Open* 2014;**4**(7) doi:  
16 393 10.1136/bmjopen-2013-004694[published Online First: Epub Date]].  
17 394 20. Schäfer I, von Leitner E-C, Schön G, et al. Multimorbidity Patterns in the Elderly: A New Approach  
18 395 of Disease Clustering Identifies Complex Interrelations between Chronic Conditions. *PLoS*  
19 396 *ONE* 2010;**5**(12):e15941 doi: 10.1371/journal.pone.0015941[published Online First: Epub  
20 397 Date]].  
21 398 21. Kubinger K. On artificial results due to using factor analysis for dichotomous variables. *Psychology*  
22 399 *Science* 2003;**45**(106-10)  
23 400 22. Norman G, Streiner D. Principal Components and Factor Analysis. *Fooling Around with Factors.*  
24 401 *Biostatistics: the bare essentials.* 3 ed. Hamilton: Bc Decker, 2008.  
25 402 23. Garin N, Olaya B, Perales J, et al. Multimorbidity patterns in a national representative sample of  
26 403 the Spanish adult population. *PLoS One* 2014;**9**(1):e84794 doi:  
27 404 10.1371/journal.pone.0084794[published Online First: Epub Date]].  
28 405 24. Barnett K, Mercer SW, Norbury M, et al. Epidemiology of multimorbidity and implications for  
29 406 health care, research, and medical education: a cross-sectional study. *Lancet*  
30 407 2012;**380**(9836):37-43 doi: 10.1016/s0140-6736(12)60240-2[published Online First: Epub  
31 408 Date]].  
32 409 25. Agborsangaya CB, Ngwakongwi E, Lahtinen M, et al. Multimorbidity prevalence in the general  
33 410 population: the role of obesity in chronic disease clustering. *BMC Public Health* 2013;**13**:1161  
34 411 doi: 10.1186/1471-2458-13-1161[published Online First: Epub Date]].  
35 412 26. Violan C, Foguet-Boreu Q, Flores-Mateo G, et al. Prevalence, determinants and patterns of  
36 413 multimorbidity in primary care: a systematic review of observational studies. *PLoS One*  
37 414 2014;**9** doi: 10.1371/journal.pone.0102149[published Online First: Epub Date]].  
38 415 27. Afshar S, Roderick PJ, Kowal P, et al. Multimorbidity and the inequalities of global ageing: a cross-  
39 416 sectional study of 28 countries using the World Health Surveys. *BMC Public Health*  
40 417 2015;**15**(1):1-10 doi: 10.1186/s12889-015-2008-7[published Online First: Epub Date]].  
41 418 28. Salive ME. Multimorbidity in Older Adults. *Epidemiologic reviews* 2013 doi:  
42 419 10.1093/epirev/mxs009[published Online First: Epub Date]].  
43 420 29. Mendoza-Sassi R, Béria JU. Health services utilization: a systematic review of related factors. *Cad*  
44 421 *Saude Publica* 2001;**17**:819-32 doi: 10.1590/S0102-311X2001000400016[published Online  
45 422 First: Epub Date]].  
46 423 30. Montez JK, Friedman EM. Educational attainment and adult health: Under what conditions is the  
47 424 association causal? *Social Science & Medicine* 2015;**127**:1-7 doi:  
48 425 <http://dx.doi.org/10.1016/j.socscimed.2014.12.029>[published Online First: Epub Date]].  
49 426 31. CSDH. Closing the gap in a generation: health equity through action on the social determinants of  
50 427 health. Final Report of the Commission on Social Determinants of Health. Geneva: World  
51 428 Health Organization, 2008.

- 1  
2  
3  
4 429 32. Haas SA, Glymour MM, Berkman LF. Childhood health and labor market inequality over the life  
5 430 course. *J Health Soc Behav* 2011;**52**(3):298-313 doi: 10.1177/0022146511410431[published  
6 431 Online First: Epub Date]].
- 7 432 33. Case A, Fertig A, Paxson C. The lasting impact of childhood health and circumstance. *Journal of*  
8 433 *Health Economics* 2005;**24**(2):365-89 doi:  
9 434 <http://dx.doi.org/10.1016/j.jhealeco.2004.09.008>[published Online First: Epub Date]].
- 10 435 34. Callander EJ, Schofield DJ. The risk of falling into poverty after developing heart disease: a survival  
11 436 analysis. *BMC Public Health* 2016;**16**(1):570 doi: 10.1186/s12889-016-3240-5[published  
12 437 Online First: Epub Date]].
- 13 438 35. Skinner EH, Foster M, Mitchell G, et al. Effect of health insurance on the utilisation of allied health  
14 439 services by people with chronic disease: a systematic review and meta-analysis. *Australian*  
15 440 *Journal of Primary Health* 2014;**20**(1):9-19 doi: <http://dx.doi.org/10.1071/PY13092>[published  
16 441 Online First: Epub Date]].
- 17 442 36. Chung RY, Mercer SW, Yip BH, et al. The association between types of regular primary care and  
18 443 hospitalization among people with and without multimorbidity: A household survey on  
19 444 25,780 Chinese. *Scientific reports* 2016;**6**:29758 doi: 10.1038/srep29758[published Online  
20 445 First: Epub Date]].
- 21 446 37. Alaba O, Chola L. The social determinants of multimorbidity in South Africa. *International journal*  
22 447 *for equity in health* 2013;**12**(1):1-10 doi: 10.1186/1475-9276-12-63[published Online First:  
23 448 Epub Date]].
- 24 449 38. Foguet-Boreu Q, Violan C, Roso-Llorach A, et al. Impact of multimorbidity: acute morbidity, area  
25 450 of residency and use of health services across the life span in a region of south Europe. *BMC*  
26 451 *Family Practice* 2014;**15**(1):1-11 doi: 10.1186/1471-2296-15-55[published Online First: Epub  
27 452 Date]].
- 28 453 39. Macinko J, Lima Costa MF. Access to, use of and satisfaction with health services among adults  
29 454 enrolled in Brazil's Family Health Strategy: evidence from the 2008 National Household  
30 455 Survey. *Tropical medicine & international health : TM & IH* 2012;**17**(1):36-42 doi:  
31 456 10.1111/j.1365-3156.2011.02866.x[published Online First: Epub Date]].
- 32 457 40. Prados-Torres A, Calderón-Larrañaga A, Hancoco-Saavedra J, et al. Multimorbidity patterns: a  
33 458 systematic review. *Journal of Clinical Epidemiology* 2014;**67**(3):254-66 doi:  
34 459 <http://dx.doi.org/10.1016/j.jclinepi.2013.09.021>[published Online First: Epub Date]].
- 35 460 41. Prados-Torres A, Poblador-Plou B, Calderón-Larrañaga A, et al. Multimorbidity Patterns in Primary  
36 461 Care: Interactions among Chronic Diseases Using Factor Analysis. *PLoS ONE*  
37 462 2012;**7**(2):e32190 doi: 10.1371/journal.pone.0032190[published Online First: Epub Date]].
- 38 463 42. Garin N, Koyanagi A, Chatterji S, et al. Global Multimorbidity Patterns: A Cross-Sectional,  
39 464 Population-Based, Multi-Country Study. *The Journals of Gerontology Series A: Biological*  
40 465 *Sciences and Medical Sciences* 2016;**71**(2):205-14 doi: 10.1093/gerona/glv128[published  
41 466 Online First: Epub Date]].
- 42 467 43. Barnes PJ, Celli BR. Systemic manifestations and comorbidities of COPD. *European Respiratory*  
43 468 *Journal* 2009;**33**(5):1165-85 doi: 10.1183/09031936.00128008[published Online First: Epub  
44 469 Date]].
- 45 470 44. Faner R, Cruz T, López-Giraldo A, et al. Network medicine, multimorbidity and the lung in the  
46 471 elderly. *European Respiratory Journal* 2014;**44**(3):775-88 doi:  
47 472 10.1183/09031936.00078714[published Online First: Epub Date]].
- 48 473 45. Huntley AL, Johnson R, Purdy S, et al. Measures of multimorbidity and morbidity burden for use  
49 474 in primary care and community settings: a systematic review and guide. *Annals of family*  
50 475 *medicine* 2012;**10**(2):134-41 doi: 10.1370/afm.1363[published Online First: Epub Date]].
- 51 476 46. Violan C, Foguet-Boreu Q, Hermosilla-Perez E, et al. Comparison of the information provided by  
52 477 electronic health records data and a population health survey to estimate prevalence of  
53 478 selected health conditions and multimorbidity. *BMC Public Health* 2013;**13**(1):251

479 **Tables and figures**

480 Table 1. Description of the sample and multimorbidity frequency. Brazil, 2013.

| Variables                          | n      | %    | Multimorbidity |             |      |             |
|------------------------------------|--------|------|----------------|-------------|------|-------------|
|                                    |        |      | %              | ≥2<br>95%CI | %    | ≥3<br>95%CI |
| <b>Sex</b>                         |        |      |                |             |      |             |
| Male                               | 25,920 | 44.9 | 17.5           | 16.6; 18.3  | 7.2  | 6.6; 7.8    |
| Female                             | 34,282 | 55.1 | 26.1           | 25.2; 27.0  | 12.6 | 12.0; 13.3  |
| <b>Age (in years)</b>              |        |      |                |             |      |             |
| 18 to 29                           | 14,321 | 24.3 | 4.9            | 4.2; 5.6    | 1.2  | 0.9; 1.5    |
| 30 to 39                           | 14,269 | 21.0 | 10.6           | 9.6; 11.5   | 2.8  | 2.3; 3.3    |
| 40 to 49                           | 11,405 | 18.8 | 20.8           | 19.5; 22.1  | 7.8  | 7.0; 8.6    |
| 50 to 59                           | 9,030  | 16.8 | 32.9           | 31.2; 34.6  | 15.5 | 14.3; 16.8  |
| 60 to 69                           | 6,238  | 10.8 | 46.3           | 44.1; 48.6  | 24.7 | 22.8; 26.6  |
| 70 to 79                           | 3,441  | 5.7  | 52.2           | 49.2; 55.2  | 30.9 | 28.0; 33.9  |
| 80 or more                         | 1,498  | 2.6  | 52.8           | 48.6; 57.0  | 30.6 | 26.5; 34.7  |
| <b>Skin color*</b>                 |        |      |                |             |      |             |
| White                              | 24,106 | 47.8 | 24.3           | 23.3; 25.4  | 11.6 | 10.8; 12.3  |
| Black                              | 5,631  | 9.2  | 22.2           | 20.2; 24.2  | 10.3 | 8.9; 11.6   |
| Brown                              | 29,512 | 41.7 | 19.8           | 18.9; 20.6  | 8.6  | 8.1; 9.2    |
| <b>Marital status</b>              |        |      |                |             |      |             |
| Without partner                    | 25,680 | 38.4 | 20.6           | 19.7; 21.5  | 9.9  | 9.3; 10.6   |
| With partner                       | 34,522 | 61.6 | 23.2           | 22.4; 24.1  | 10.4 | 9.7; 11.0   |
| <b>Schooling (in years)</b>        |        |      |                |             |      |             |
| 0                                  | 9,434  | 13.9 | 33.2           | 31.4; 35.0  | 16.3 | 14.9; 17.7  |
| 1-8                                | 14,649 | 25.7 | 30.0           | 28.6; 31.4  | 16.1 | 14.9; 17.2  |
| 8-11                               | 9,215  | 15.3 | 17.9           | 16.5; 19.3  | 7.5  | 6.5; 8.4    |
| ≥12                                | 26,904 | 45.2 | 15.8           | 15.0; 16.7  | 5.9  | 5.4; 6.5    |
| <b>Wealth index (in quintiles)</b> |        |      |                |             |      |             |
| 1° (High)                          | 10,153 | 22.3 | 22.0           | 20.5; 23.6  | 9.3  | 8.3; 10.4   |
| 2°                                 | 11,531 | 22.4 | 22.3           | 21.0; 23.6  | 10.5 | 9.5; 11.5   |
| 3°                                 | 11,621 | 19.5 | 23.1           | 21.8; 24.4  | 10.6 | 9.7; 11.5   |
| 4°                                 | 14,380 | 21.0 | 22.2           | 20.9; 23.5  | 10.6 | 9.7; 11.6   |
| 5° (Low)                           | 12,517 | 14.7 | 21.3           | 19.9; 22.7  | 9.9  | 8.9; 10.9   |
| <b>Private health plan</b>         |        |      |                |             |      |             |
| No                                 | 43,834 | 69.4 | 21.1           | 20.3; 21.9  | 9.8  | 9.3; 10.4   |
| Yes                                | 16,368 | 30.6 | 24.8           | 23.5; 26.1  | 11.0 | 10.1; 12.0  |
| <b>Geographical area</b>           |        |      |                |             |      |             |
| Urban                              | 49,245 | 86.5 | 22.8           | 22.0; 23.5  | 10.5 | 10.0; 11.1  |
| Rural                              | 10,957 | 13.5 | 18.6           | 17.2; 20.0  | 8.0  | 7.1; 8.8    |
| <b>State-level education</b>       |        |      |                |             |      |             |

|                           |               |              |             |                   |             |                  |
|---------------------------|---------------|--------------|-------------|-------------------|-------------|------------------|
| High                      | 22,382        | 37.2         | 24.7        | 23.7; 25.7        | 11.7        | 10.9; 12.4       |
| Middle                    | 19,515        | 32.4         | 20.1        | 18.6; 21.7        | 9.3         | 8.3; 10.4        |
| Low                       | 18,305        | 30.4         | 19.0        | 18.0; 20.1        | 8.0         | 7.3; 8.6         |
| <b>State-level income</b> |               |              |             |                   |             |                  |
| High                      | 21,683        | 36.0         | 24.6        | 23.6; 25.7        | 11.6        | 10.8; 12.3       |
| Middle                    | 18,087        | 30.0         | 21.8        | 20.2; 23.3        | 10.5        | 9.5; 11.6        |
| Low                       | 20,432        | 33.9         | 18.2        | 17.2; 19.2        | 7.5         | 6.9; 8.1         |
| <b>Total</b>              | <b>60,202</b> | <b>100.0</b> | <b>22.2</b> | <b>21.5; 22.9</b> | <b>10.2</b> | <b>9.7; 10.7</b> |

For peer review only

481 Table 2. Adjusted multilevel models of multimorbidity with independent variables. Brazil, 2013.

| Variables                                      | Multimorbidity (≥2) |                   |             |                   |             |                   | Multimorbidity (≥3) |                   |             |                   |             |                   |
|------------------------------------------------|---------------------|-------------------|-------------|-------------------|-------------|-------------------|---------------------|-------------------|-------------|-------------------|-------------|-------------------|
|                                                | Model 1             |                   | Model 2     |                   | Model 3     |                   | Model 1             |                   | Model 2     |                   | Model 3     |                   |
|                                                | OR                  | CI95%             | OR          | CI95%             | OR          | CI95%             | OR                  | CI95%             | OR          | CI95%             | OR          | CI95%             |
| <b>Sex (ref: male)</b>                         |                     |                   |             |                   |             |                   |                     |                   |             |                   |             |                   |
| Female                                         | <b>1.84</b>         | <b>1.76; 1.94</b> | <b>1.85</b> | <b>1.77; 1.94</b> | <b>1.85</b> | <b>1.77; 1.94</b> | <b>1.95</b>         | <b>1.83; 2.08</b> | <b>1.95</b> | <b>1.83; 2.08</b> | <b>1.95</b> | <b>1.83; 2.09</b> |
| <b>Age (in years)</b>                          | <b>1.06</b>         | <b>1.06; 1.06</b> | <b>1.06</b> | <b>1.06; 1.06</b> | <b>1.06</b> | <b>1.06; 1.06</b> | <b>1.06</b>         | <b>1.06; 1.06</b> | <b>1.06</b> | <b>1.06; 1.06</b> | <b>1.06</b> | <b>1.06; 1.06</b> |
| <b>Skin color* (ref: White)</b>                |                     |                   |             |                   |             |                   |                     |                   |             |                   |             |                   |
| Black                                          | 1.07                | 0.99; 1.16        | 1.08        | 0.99; 1.17        | 1.08        | 0.99; 1.17        | 1.09                | 0.98; 1.21        | 1.09        | 0.98; 1.21        | 1.09        | 0.98; 1.21        |
| Brown                                          | 1.01                | 0.96; 1.06        | 1.01        | 0.96; 1.07        | 1.01        | 0.96; 1.07        | 0.97                | 0.91; 1.04        | 0.97        | 0.91; 1.04        | 0.97        | 0.91; 1.04        |
| <b>Marital status (ref: Without partner)</b>   |                     |                   |             |                   |             |                   |                     |                   |             |                   |             |                   |
| With partner                                   | <b>1.13</b>         | <b>1.08; 1.18</b> | <b>1.13</b> | <b>1.08; 1.19</b> | <b>1.13</b> | <b>1.08; 1.19</b> | <b>1.17</b>         | <b>1.09; 1.24</b> | <b>1.17</b> | <b>1.09; 1.24</b> | <b>1.17</b> | <b>1.09; 1.24</b> |
| <b>Schooling (in years) # (ref: ≥12)</b>       |                     |                   |             |                   |             |                   |                     |                   |             |                   |             |                   |
| 8-11                                           | <b>1.19</b>         | <b>1.11; 1.28</b> | <b>1.19</b> | <b>1.10; 1.28</b> | <b>1.19</b> | <b>1.10; 1.28</b> | <b>1.22</b>         | <b>1.10; 1.35</b> | <b>1.22</b> | <b>1.10; 1.35</b> | <b>1.22</b> | <b>1.10; 1.35</b> |
| 1-8                                            | <b>1.41</b>         | <b>1.33; 1.51</b> | <b>1.41</b> | <b>1.33; 1.50</b> | <b>1.41</b> | <b>1.33; 1.50</b> | <b>1.57</b>         | <b>1.44; 1.71</b> | <b>1.57</b> | <b>1.44; 1.71</b> | <b>1.57</b> | <b>1.44; 1.71</b> |
| 0                                              | <b>1.34</b>         | <b>1.24; 1.44</b> | <b>1.34</b> | <b>1.24; 1.44</b> | <b>1.34</b> | <b>1.24; 1.44</b> | <b>1.41</b>         | <b>1.27; 1.56</b> | <b>1.41</b> | <b>1.28; 1.56</b> | <b>1.41</b> | <b>1.28; 1.56</b> |
| <b>Wealth index (in quintiles) (ref: High)</b> |                     |                   |             |                   |             |                   |                     |                   |             |                   |             |                   |
| 2°                                             | <b>1.12</b>         | <b>1.04; 1.20</b> | <b>1.12</b> | <b>1.04; 1.20</b> | <b>1.12</b> | <b>1.04; 1.20</b> | <b>1.15</b>         | <b>1.04; 1.28</b> | <b>1.15</b> | <b>1.04; 1.28</b> | <b>1.15</b> | <b>1.04; 1.28</b> |
| 3°                                             | <b>1.21</b>         | <b>1.12; 1.31</b> | <b>1.21</b> | <b>1.12; 1.31</b> | <b>1.21</b> | <b>1.12; 1.31</b> | <b>1.19</b>         | <b>1.07; 1.33</b> | <b>1.19</b> | <b>1.07; 1.33</b> | <b>1.19</b> | <b>1.07; 1.33</b> |
| 4°                                             | 1.05                | 0.96; 1.14        | 1.05        | 0.97; 1.14        | 1.05        | 0.97; 1.14        | 1.09                | 0.98; 1.22        | 1.10        | 0.98; 1.23        | 1.10        | 0.98; 1.23        |
| 5° (Low)                                       | 0.91                | 0.83; 1.00        | 0.92        | 0.84; 1.01        | 0.92        | 0.84; 1.01        | 0.95                | 0.84; 1.08        | 0.95        | 0.84; 1.08        | 0.95        | 0.84; 1.08        |
| <b>Private health plan (ref: no)</b>           |                     |                   |             |                   |             |                   |                     |                   |             |                   |             |                   |
| Yes                                            | <b>1.15</b>         | <b>1.08; 1.21</b> | <b>1.15</b> | <b>1.08; 1.20</b> | <b>1.15</b> | <b>1.08; 1.20</b> | <b>1.09</b>         | <b>1.01; 1.18</b> | <b>1.09</b> | <b>1.01; 1.18</b> | <b>1.09</b> | <b>1.01; 1.18</b> |
| <b>Geographical area (ref: urban)</b>          |                     |                   |             |                   |             |                   |                     |                   |             |                   |             |                   |
| Rural                                          | <b>0.86</b>         | <b>0.80; 0.92</b> | <b>0.86</b> | <b>0.80; 0.92</b> | <b>0.86</b> | <b>0.80; 0.92</b> | <b>0.78</b>         | <b>0.71; 0.86</b> | <b>0.78</b> | <b>0.71; 0.86</b> | <b>0.78</b> | <b>0.71; 0.86</b> |
| <b>State-level education (ref: High)</b>       |                     |                   |             |                   |             |                   |                     |                   |             |                   |             |                   |
| Middle                                         |                     |                   | <b>0.82</b> | <b>0.71; 0.94</b> |             |                   |                     |                   | <b>0.76</b> | <b>0.64; 0.90</b> |             |                   |
| Low                                            |                     |                   | <b>0.83</b> | <b>0.72; 0.96</b> |             |                   |                     |                   | <b>0.76</b> | <b>0.64; 0.90</b> |             |                   |
| <b>State-level income (ref: High)</b>          |                     |                   |             |                   |             |                   |                     |                   |             |                   |             |                   |
| Middle                                         |                     |                   |             |                   | 0.89        | 0.77; 1.04        |                     |                   |             |                   | 0.88        | 0.73; 1.05        |
| Low                                            |                     |                   |             |                   | <b>0.82</b> | <b>0.71; 0.95</b> |                     |                   |             |                   | <b>0.75</b> | <b>0.63; 0.89</b> |

482

483 Table 3. Adjusted multilevel models of multimorbidity with independent variables stratified by region. Brazil, 2013.

| Variables                                          | Northern region   |                   | Northeastern region |                   | Central Western region |                   | Southeastern region |                   | Southern region   |                   |
|----------------------------------------------------|-------------------|-------------------|---------------------|-------------------|------------------------|-------------------|---------------------|-------------------|-------------------|-------------------|
|                                                    | MM (≥2)           | MM (≥3)           | MM (≥2)             | MM (≥3)           | MM (≥2)                | MM (≥3)           | MM (≥2)             | MM (≥3)           | MM (≥2)           | MM (≥3)           |
|                                                    | OR                | OR                | OR                  | OR                | OR                     | OR                | OR                  | OR                | OR                | OR                |
|                                                    | CI95%             | CI95%             | CI95%               | CI95%             | CI95%                  | CI95%             | CI95%               | CI95%             | CI95%             | CI95%             |
| <b>Sex (ref: male)</b>                             |                   |                   |                     |                   |                        |                   |                     |                   |                   |                   |
| Female                                             | <b>1.81</b>       | <b>2.06</b>       | <b>1.96</b>         | <b>2.08</b>       | <b>2.22</b>            | <b>2.37</b>       | <b>1.62</b>         | <b>1.61</b>       | <b>1.84</b>       | <b>2.04</b>       |
|                                                    | <b>1.62; 2.02</b> | <b>1.75; 2.43</b> | <b>1.8; 2.14</b>    | <b>1.84; 2.36</b> | <b>1.94; 2.54</b>      | <b>1.97; 2.86</b> | <b>1.48; 1.78</b>   | <b>1.43; 1.82</b> | <b>1.63; 2.08</b> | <b>1.73; 2.39</b> |
| <b>Age (in years)</b>                              | <b>1.05</b>       | <b>1.06</b>       | <b>1.06</b>         | <b>1.06</b>       | <b>1.07</b>            | <b>1.07</b>       | <b>1.05</b>         | <b>1.05</b>       | <b>1.06</b>       | <b>1.06</b>       |
|                                                    | <b>1.05; 1.06</b> | <b>1.05; 1.06</b> | <b>1.06; 1.06</b>   | <b>1.06; 1.06</b> | <b>1.06; 1.07</b>      | <b>1.06; 1.07</b> | <b>1.05; 1.06</b>   | <b>1.05; 1.06</b> | <b>1.05; 1.06</b> | <b>1.06; 1.07</b> |
| <b>Marital status (ref: Without partner)</b>       |                   |                   |                     |                   |                        |                   |                     |                   |                   |                   |
| With partner                                       | <b>1.13</b>       | <b>1.17</b>       | <b>1.16</b>         | <b>1.23</b>       | 1.00                   | 0.93              | <b>1.15</b>         | <b>1.22</b>       | <b>1.16</b>       | <b>1.19</b>       |
|                                                    | <b>1.02; 1.27</b> | <b>1; 1.38</b>    | <b>1.07; 1.27</b>   | <b>1.09; 1.39</b> | 0.87; 1.14             | 0.78; 1.11        | <b>1.05; 1.26</b>   | <b>1.08; 1.38</b> | <b>1.02; 1.32</b> | <b>1.01; 1.4</b>  |
| <b>Skin color* (ref: White)</b>                    |                   |                   |                     |                   |                        |                   |                     |                   |                   |                   |
| Black                                              | 1.01              | 1.06              | 1.12                | 1.14              | 0.94                   | 0.89              | 1.11                | 1.15              | 1.00              | 0.98              |
|                                                    | 0.82; 1.23        | 0.79; 1.42        | 0.97; 1.3           | 0.94; 1.39        | 0.74; 1.21             | 0.63; 1.26        | 0.96; 1.29          | 0.95; 1.4         | 0.76; 1.31        | 0.7; 1.38         |
| Brown                                              | 0.92              | 0.92              | 0.96                | 0.93              | 1.13                   | 1.14              | 1.07                | 1.02              | 1.08              | 0.88              |
|                                                    | 0.81; 1.04        | 0.76; 1.1         | 0.87; 1.05          | 0.81; 1.05        | 0.98; 1.29             | 0.95; 1.36        | 0.97; 1.18          | 0.89; 1.16        | 0.91; 1.27        | 0.71; 1.09        |
| <b>Schooling (in years) # (ref: more educated)</b> |                   |                   |                     |                   |                        |                   |                     |                   |                   |                   |
| III                                                | 1.17              | 1.12              | 1.10                | 0.95              | 1.16                   | 1.32              | <b>1.35</b>         | <b>1.47</b>       | 1.12              | 1.27              |
|                                                    | 0.99; 1.39        | 0.86; 1.47        | 0.95; 1.28          | 0.76; 1.18        | 0.94; 1.42             | 0.99; 1.75        | <b>1.18; 1.55</b>   | <b>1.22; 1.78</b> | 0.94; 1.35        | 0.99; 1.62        |
| II                                                 | <b>1.23</b>       | <b>1.36</b>       | <b>1.33</b>         | <b>1.35</b>       | <b>1.33</b>            | <b>1.32</b>       | <b>1.65</b>         | <b>1.89</b>       | <b>1.43</b>       | <b>1.73</b>       |
|                                                    | <b>1.05; 1.44</b> | <b>1.08; 1.71</b> | <b>1.18; 1.51</b>   | <b>1.14; 1.6</b>  | <b>1.11; 1.59</b>      | <b>1.03; 1.68</b> | <b>1.46; 1.86</b>   | <b>1.61; 2.22</b> | <b>1.22; 1.68</b> | <b>1.41; 2.13</b> |
| I (less educated)                                  | <b>1.32</b>       | <b>1.48</b>       | <b>1.38</b>         | <b>1.36</b>       | 1.17                   | 1.25              | <b>1.43</b>         | <b>1.40</b>       | 1.19              | <b>1.46</b>       |
|                                                    | <b>1.12; 1.55</b> | <b>1.16; 1.88</b> | <b>1.21; 1.58</b>   | <b>1.13; 1.65</b> | 0.94; 1.46             | 0.94; 1.68        | <b>1.22; 1.67</b>   | <b>1.14; 1.71</b> | 0.97; 1.47        | <b>1.12; 1.89</b> |
| <b>Wealth index (in quintiles) (ref: High)</b>     |                   |                   |                     |                   |                        |                   |                     |                   |                   |                   |
| 2°                                                 | 1.03              | 0.92              | 1.07                | 1.21              | <b>1.29</b>            | 1.17              | 1.03                | 1.09              | <b>1.22</b>       | 1.25              |
|                                                    | 0.83; 1.29        | 0.67; 1.27        | 0.91; 1.26          | 0.96; 1.52        | <b>1.05; 1.58</b>      | 0.89; 1.55        | 0.90; 1.18          | 0.91; 1.3         | <b>1.04; 1.44</b> | 1.00; 1.57        |
| 3°                                                 | 1.21              | 0.98              | <b>1.26</b>         | <b>1.40</b>       | 1.19                   | 1.10              | 1.02                | 1.05              | <b>1.42</b>       | <b>1.33</b>       |
|                                                    | 0.98; 1.51        | 0.71; 1.34        | <b>1.07; 1.48</b>   | <b>1.11; 1.76</b> | 0.95; 1.48             | 0.82; 1.48        | 0.89; 1.18          | 0.87; 1.27        | <b>1.18; 1.7</b>  | <b>1.05; 1.69</b> |
| 4°                                                 | 0.90              | 0.82              | 1.07                | 1.22              | 1.13                   | 1.18              | 0.96                | 0.98              | <b>1.34</b>       | 1.30              |
|                                                    | 0.72; 1.12        | 0.60; 1.11        | 0.91; 1.26          | 0.97; 1.53        | 0.9; 1.42              | 0.88; 1.59        | 0.82; 1.12          | 0.79; 1.20        | <b>1.09; 1.66</b> | 1.00; 1.7         |
| 5° (Low)                                           | 0.80              | 0.74              | 0.93                | 0.97              | 1.05                   | 1.16              | 0.94                | 1.13              | 0.92              | 0.85              |
|                                                    | 0.64; 1.01        | 0.53; 1.03        | 0.78; 1.12          | 0.76; 1.25        | 0.80; 1.36             | 0.83; 1.62        | 0.77; 1.14          | 0.88; 1.45        | 0.71; 1.20        | 0.61; 1.19        |

1  
2  
3  
4  
5  
6  
7  
8  
9  
10  
11  
12  
13  
14  
15  
16  
17  
18  
19  
20  
21  
22  
23  
24  
25  
26  
27  
28  
29  
30  
31  
32  
33  
34  
35  
36  
37  
38  
39  
40  
41  
42  
43  
44  
45  
46  
47  
48  
49

|                                       |            |                   |                   |                   |            |            |                   |            |                   |            |  |
|---------------------------------------|------------|-------------------|-------------------|-------------------|------------|------------|-------------------|------------|-------------------|------------|--|
| <b>Private health plan (ref: no)</b>  |            |                   |                   |                   |            |            |                   |            |                   |            |  |
| Yes                                   | 1.15       | <b>1.29</b>       | <b>1.23</b>       | <b>1.22</b>       | 1.15       | 1.16       | <b>1.12</b>       | 1.05       | 1.10              | 0.91       |  |
|                                       | 0.98; 1.35 | <b>1.02; 1.61</b> | <b>1.09; 1.39</b> | <b>1.04; 1.44</b> | 0.99; 1.34 | 0.95; 1.41 | <b>1.01; 1.24</b> | 0.92; 1.2  | 0.96; 1.25        | 0.77; 1.09 |  |
| <b>Geographical area (ref: urban)</b> |            |                   |                   |                   |            |            |                   |            |                   |            |  |
| Rural                                 | 0.89       | <b>0.76</b>       | <b>0.84</b>       | <b>0.75</b>       | 0.91       | 0.85       | 0.88              | 0.82       | <b>0.82</b>       | 0.83       |  |
|                                       | 0.77; 1.03 | <b>0.61; 0.94</b> | <b>0.75; 0.94</b> | <b>0.64; 0.88</b> | 0.75; 1.11 | 0.65; 1.11 | 0.76; 1.02        | 0.67; 1.00 | <b>0.68; 0.97</b> | 0.67; 1.04 |  |

484 Note: MM = Multimorbidity

485

486

For peer review only



487 Table 4. Adjusted multilevel models of patterns of diseases (factors) with independent variables. Brazil, 2013.

| Variables                                                           | Factor 1 (Cardiometabolic) |              |         |              |         |              | Factor 2 (Respiratory/mental/<br>muscle-skeletal) |              |         |              |         |              |  |
|---------------------------------------------------------------------|----------------------------|--------------|---------|--------------|---------|--------------|---------------------------------------------------|--------------|---------|--------------|---------|--------------|--|
|                                                                     | Model 1                    |              | Model 2 |              | Model 3 |              | Model 1                                           |              | Model 2 |              | Model 3 |              |  |
|                                                                     | $\beta$                    | CI95%        | $\beta$ | CI95%        | $\beta$ | CI95%        | $\beta$                                           | CI95%        | $\beta$ | CI95%        | $\beta$ | CI95%        |  |
| <b>Sex (ref: male)</b>                                              |                            |              |         |              |         |              |                                                   |              |         |              |         |              |  |
| Female                                                              | .024                       | .022; .026   | .024    | .022; .026   | .024    | .022; .026   | .038                                              | .036; .040   | .038    | .036; .040   | .038    | .036; .040   |  |
| <b>Age (in years)</b>                                               | .004                       | .004; .004   | .004    | .004; .004   | .004    | .004; .004   | .001                                              | .001; .001   | .001    | .001; .001   | .001    | .001; .001   |  |
| <b>Skin color* (ref: White)</b>                                     |                            |              |         |              |         |              |                                                   |              |         |              |         |              |  |
| Black                                                               | .007                       | -.003; .010  | .007    | .003; .010   | .007    | .003; .010   | -.009                                             | -.013; -.005 | -.009   | -.013; -.005 | -.009   | -.013; -.005 |  |
| Brown                                                               | .001                       | -.001; .004  | .002    | -.001; .004  | .002    | -.001; .004  | -.004                                             | -.006; -.001 | -.004   | -.006; -.001 | -.004   | -.006; -.001 |  |
| <b>Marital status (ref: Without partner)</b>                        |                            |              |         |              |         |              |                                                   |              |         |              |         |              |  |
| With partner                                                        | .000                       | -.002; .002  | .000    | -.002; .002  | .000    | -.002; .002  | -.005                                             | -.007; -.002 | -.005   | -.007; -.003 | -.005   | -.007; -.003 |  |
| <b>Schooling (in years)<sup>#</sup> (ref: <math>\geq 12</math>)</b> |                            |              |         |              |         |              |                                                   |              |         |              |         |              |  |
| 8-11                                                                | .013                       | .010; .016   | .013    | .010; .016   | .013    | .010; .016   | .004                                              | .001; .008   | .005    | .002; .008   | .005    | .002; .008   |  |
| 1-8                                                                 | .021                       | .018; .023   | .021    | .018; .023   | .021    | .018; .023   | .011                                              | .008; .014   | .011    | .008; .014   | .011    | .008; .014   |  |
| 0                                                                   | .014                       | .010; .017   | .014    | .010; .017   | .014    | .010; .017   | .001                                              | -.003; .004  | .001    | -.003; .005  | .001    | -.003; .005  |  |
| <b>Wealth index (in quintiles) (ref: High)</b>                      |                            |              |         |              |         |              |                                                   |              |         |              |         |              |  |
| 2°                                                                  | .007                       | .004; .010   | .007    | .004; .010   | .007    | .004; .010   | .005                                              | .001; .008   | .005    | .001; .008   | .005    | .001; .008   |  |
| 3°                                                                  | .009                       | .006; .013   | .009    | .006; .013   | .009    | .006; .013   | .010                                              | .006; .014   | .010    | .006; .014   | .010    | .006; .014   |  |
| 4°                                                                  | .006                       | .002; .009   | .006    | .002; .009   | .006    | .002; .009   | .004                                              | .000; .008   | .004    | .000; .008   | .004    | .000; .008   |  |
| 5° (Low)                                                            | -.003                      | -.007; .001  | -.003   | -.007; .001  | -.003   | -.007; .001  | .001                                              | -.004; .005  | .001    | -.004; .005  | .001    | -.004; .005  |  |
| <b>Private health plan (ref: no)</b>                                |                            |              |         |              |         |              |                                                   |              |         |              |         |              |  |
| Yes                                                                 | .006                       | .004; .009   | .006    | .004; .009   | .006    | .004; .009   | .007                                              | .005; .010   | .007    | .005; .010   | .007    | .005; .010   |  |
| <b>Geographical area (ref: urban)</b>                               |                            |              |         |              |         |              |                                                   |              |         |              |         |              |  |
| Rural                                                               | -.008                      | -.011; -.005 | -.008   | -.011; -.005 | -.008   | -.011; -.005 | -.002                                             | -.005; .002  | -.002   | -.005; .002  | -.002   | -.005; .002  |  |
| <b>State-level education (ref: High)</b>                            |                            |              |         |              |         |              |                                                   |              |         |              |         |              |  |
| Middle                                                              |                            |              | -.010   | -.016; -.004 |         |              |                                                   |              | -.016   | -.027; -.005 |         |              |  |
| Low                                                                 |                            |              | -.008   | -.015; -.002 |         |              |                                                   |              | -.018   | -.029; -.006 |         |              |  |
| <b>State-level income (ref: High)</b>                               |                            |              |         |              |         |              |                                                   |              |         |              |         |              |  |
| Middle                                                              |                            |              |         |              | -.006   | -.012; .001  |                                                   |              |         |              | -.011   | -.022; .001  |  |
| Low                                                                 |                            |              |         |              | -.009   | -.016; -.003 |                                                   |              |         |              | -.017   | -.028; -.006 |  |

488

489

490 Table 5. Adjusted multilevel models of multimorbidity factors with independent variables stratified by region. Brazil, 2013.

| Variables                                          | Northern region     |                       | Northeastern region |                     | Central Western region |                      | Southeastern region |                      | Southern region     |                       |
|----------------------------------------------------|---------------------|-----------------------|---------------------|---------------------|------------------------|----------------------|---------------------|----------------------|---------------------|-----------------------|
|                                                    | Factor 1            | Factor 2              | Factor 1            | Factor 2            | Factor 1               | Factor 2             | Factor 1            | Factor 2             | Factor 1            | Factor 2              |
|                                                    | $\beta$             | $\beta$               | $\beta$             | $\beta$             | $\beta$                | $\beta$              | $\beta$             | $\beta$              | $\beta$             | $\beta$               |
|                                                    | CI95%               | CI95%                 | CI95%               | CI95%               | CI95%                  | CI95%                | CI95%               | CI95%                | CI95%               | CI95%                 |
| <b>Sex (ref: male)</b>                             |                     |                       |                     |                     |                        |                      |                     |                      |                     |                       |
| Female                                             | <b>0.022</b>        | <b>0.023</b>          | <b>0.027</b>        | <b>0.030</b>        | <b>0.029</b>           | <b>0.050</b>         | <b>0.020</b>        | <b>0.041</b>         | <b>0.023</b>        | <b>0.061</b>          |
|                                                    | <b>0.018; 0.026</b> | <b>0.019; 0.027</b>   | <b>0.023; 0.03</b>  | <b>0.027; 0.034</b> | <b>0.023; 0.034</b>    | <b>0.044; 0.056</b>  | <b>0.015; 0.024</b> | <b>0.036; 0.045</b>  | <b>0.017; 0.03</b>  | <b>0.053; 0.069</b>   |
| <b>Age (in years)</b>                              | <b>0.003</b>        | <b>0.001</b>          | <b>0.004</b>        | <b>0.001</b>        | <b>0.004</b>           | <b>0.001</b>         | <b>0.004</b>        | <b>0.001</b>         | <b>0.004</b>        | <b>0.002</b>          |
|                                                    | <b>0.003; 0.003</b> | <b>0.001; 0.001</b>   | <b>0.003; 0.004</b> | <b>0.001; 0.001</b> | <b>0.004; 0.004</b>    | <b>0.001; 0.002</b>  | <b>0.004; 0.004</b> | <b>0.001; 0.001</b>  | <b>0.004; 0.004</b> | <b>0.001; 0.002</b>   |
| <b>Marital status (ref: Without partner)</b>       |                     |                       |                     |                     |                        |                      |                     |                      |                     |                       |
| With partner                                       | 0.001               | -0.002                | 0.000               | -0.002              | <b>-0.007</b>          | <b>-0.013</b>        | 0.001               | -0.005               | 0.002               | <b>-0.010</b>         |
|                                                    | -0.003; 0.005       | -0.006; 0.003         | -0.003; 0.004       | -0.005; 0.002       | <b>-0.013; -0.002</b>  | <b>-0.02; -0.007</b> | -0.003; 0.005       | -0.010; 0.000        | -0.004; 0.009       | <b>-0.018; -0.002</b> |
| <b>Skin color* (ref: White)</b>                    |                     |                       |                     |                     |                        |                      |                     |                      |                     |                       |
| Black                                              | 0.005               | -0.007                | <b>0.007</b>        | -0.003              | -0.001                 | <b>-0.021</b>        | <b>0.008</b>        | <b>-0.011</b>        | 0.013               | -0.018                |
|                                                    | -0.002; 0.013       | -0.015; 0.001         | <b>0.001; 0.013</b> | -0.01; 0.003        | -0.011; 0.009          | <b>-0.033; -0.01</b> | <b>0.001; 0.016</b> | <b>-0.02; -0.003</b> | -0.001; 0.026       | -0.036; 0.000         |
| Brown                                              | -0.002              | <b>-0.007</b>         | -0.001              | -0.003              | 0.004                  | -0.003               | 0.004               | -0.002               | 0.005               | 0.004                 |
|                                                    | -0.007; 0.002       | <b>-0.012; -0.002</b> | -0.005; 0.003       | -0.008; 0.001       | -0.001; 0.01           | -0.010; 0.004        | -0.001; 0.009       | -0.008; 0.003        | -0.003; 0.014       | -0.007; 0.015         |
| <b>Schooling (in years) # (ref: more educated)</b> |                     |                       |                     |                     |                        |                      |                     |                      |                     |                       |
| III                                                | 0.006               | <b>0.007</b>          | <b>0.011</b>        | 0.000               | <b>0.012</b>           | -0.001               | <b>0.016</b>        | 0.007                | <b>0.019</b>        | 0.010                 |
|                                                    | 0.000; 0.011        | <b>0.001; 0.013</b>   | <b>0.006; 0.017</b> | -0.006; 0.006       | <b>0.004; 0.02</b>     | -0.011; 0.008        | <b>0.010; 0.023</b> | 0.000; 0.014         | <b>0.01; 0.028</b>  | -0.002; 0.021         |
| II                                                 | <b>0.009</b>        | 0.005                 | <b>0.015</b>        | <b>0.006</b>        | <b>0.016</b>           | -0.001               | <b>0.029</b>        | <b>0.019</b>         | <b>0.037</b>        | <b>0.020</b>          |
|                                                    | <b>0.003; 0.014</b> | -0.001; 0.011         | <b>0.010; 0.020</b> | <b>0.001; 0.012</b> | <b>0.009; 0.024</b>    | -0.01; 0.008         | <b>0.023; 0.035</b> | <b>0.013; 0.026</b>  | <b>0.028; 0.046</b> | <b>0.009; 0.031</b>   |
| I (less educated)                                  | <b>0.014</b>        | <b>0.008</b>          | <b>0.010</b>        | 0.002               | <b>0.015</b>           | -0.009               | <b>0.022</b>        | -0.002               | <b>0.016</b>        | -0.005                |
|                                                    | <b>0.008; 0.02</b>  | <b>0.001; 0.014</b>   | <b>0.004; 0.015</b> | -0.004; 0.008       | <b>0.005; 0.025</b>    | -0.021; 0.002        | <b>0.014; 0.03</b>  | -0.011; 0.007        | <b>0.004; 0.027</b> | -0.02; 0.01           |
| <b>Wealth index (in quintiles) (ref: High)</b>     |                     |                       |                     |                     |                        |                      |                     |                      |                     |                       |
| 2°                                                 | 0.005               | 0.005                 | 0.005               | 0.002               | 0.008                  | 0.004                | 0.004               | -0.003               | <b>0.011</b>        | <b>0.017</b>          |
|                                                    | -0.003; 0.013       | -0.004; 0.013         | -0.002; 0.011       | -0.005; 0.009       | -0.001; 0.016          | -0.005; 0.014        | -0.002; 0.011       | -0.01; 0.004         | <b>0.003; 0.002</b> | <b>0.007; 0.028</b>   |
| 3°                                                 | <b>0.009</b>        | 0.004                 | <b>0.012</b>        | <b>0.010</b>        | 0.002                  | 0.002                | 0.004               | 0.002                | <b>0.012</b>        | <b>0.027</b>          |
|                                                    | <b>0.001; 0.017</b> | -0.004; 0.013         | <b>0.005; 0.018</b> | <b>0.003; 0.017</b> | -0.007; 0.011          | -0.008; 0.013        | -0.003; 0.011       | -0.005; 0.01         | <b>0.003; 0.021</b> | <b>0.015; 0.039</b>   |

|                                       |                       |                     |                       |                       |                       |                     |               |                       |               |                     |
|---------------------------------------|-----------------------|---------------------|-----------------------|-----------------------|-----------------------|---------------------|---------------|-----------------------|---------------|---------------------|
| 4°                                    | 0.004                 | -0.001              | 0.005                 | 0.004                 | 0.005                 | 0.005               | 0.003         | -0.007                | 0.009         | <b>0.019</b>        |
|                                       | -0.004; 0.011         | -0.01; 0.007        | -0.002; 0.011         | -0.003; 0.011         | -0.005; 0.014         | -0.006; 0.016       | -0.004; 0.011 | -0.015; 0.001         | -0.002; 0.02  | <b>0.005; 0.033</b> |
| 5° (Low)                              | -0.004                | -0.009              | -0.001                | 0.004                 | 0.001                 | 0.004               | -0.006        | -0.004                | -0.012        | 0.012               |
|                                       | -0.012; 0.004         | -0.017; 0.000       | -0.009; 0.006         | -0.003; 0.012         | -0.010; 0.012         | -0.008; 0.017       | -0.015; 0.004 | -0.015; 0.006         | -0.026; 0.002 | -0.006; 0.029       |
| <b>Private health plan (ref: no)</b>  |                       |                     |                       |                       |                       |                     |               |                       |               |                     |
| Yes                                   | <b>0.009</b>          | <b>0.009</b>        | <b>0.010</b>          | <b>0.008</b>          | 0.007                 | <b>0.009</b>        | 0.002         | <b>0.008</b>          | 0.005         | 0.001               |
|                                       | <b>0.003; 0.015</b>   | <b>0.003; 0.016</b> | <b>0.006; 0.015</b>   | <b>0.003; 0.013</b>   | 0.000; 0.013          | <b>0.001; 0.016</b> | -0.003; 0.006 | <b>0.002; 0.013</b>   | -0.002; 0.012 | -0.008; 0.01        |
| <b>Geographical area (ref: urban)</b> |                       |                     |                       |                       |                       |                     |               |                       |               |                     |
| Rural                                 | <b>-0.007</b>         | 0.004               | <b>-0.008</b>         | <b>-0.006</b>         | <b>-0.009</b>         | <b>-0.001</b>       | -0.007        | <b>-0.010</b>         | -0.008        | 0.009               |
|                                       | <b>-0.012; -0.002</b> | -0.002; 0.009       | <b>-0.013; -0.004</b> | <b>-0.011; -0.001</b> | <b>-0.018; -0.001</b> | <b>-0.01; 0.009</b> | -0.014; 0.000 | <b>-0.018; -0.001</b> | -0.017; 0.002 | -0.003; 0.021       |

491 Note: Factor 1: cardiometabolic; factor 2: (Respiratory/mental/ muscle-skeletal)

492

Supplementary table 1. Individual prevalence, duration and number of comorbidities for each morbidity evaluated. Brazil, 2013.

| Morbidities                            | Individual prevalence |             | Duration of disease    | Number of comorbidities |
|----------------------------------------|-----------------------|-------------|------------------------|-------------------------|
|                                        | %                     | (95%CI)     | Mean (median; Q25-Q75) | Mean (median; Q25-Q75)  |
| High Blood Pressure                    | 22.3                  | 21.7 - 23.0 | 13.1 (9; 3-18)         | 2.3 (2; 1-3)            |
| Spinal column problem                  | 19.0                  | 18.3 - 19.7 | 14.7 (10; 4-21)        | 2.3 (2; 1-3)            |
| Hypercholesterolemia                   | 8.4                   | 8.0 - 8.8   | 6.9 (3; 1-9)           | 2.3 (2; 1-3)            |
| Arthritis/rheumatism                   | 6.7                   | 6.4 - 7.1   | 14.6 (10; 3-20)        | 3.0 (3; 2-4)            |
| Diabetes                               | 6.5                   | 6.2 - 6.9   | 11.3 (6; 2-15)         | 2.9 (3; 2-4)            |
| Asthma/wheezy bronchitis               | 4.4                   | 4.1 - 4.8   | 25.1 (23; 13-35)       | 2.4 (2; 1-3)            |
| Depression                             | 4.2                   | 3.9 - 4.5   | -                      | 2.9 (3; 2-4)            |
| Work-related muscle-skeletal disorders | 2.5                   | 2.2 - 2.8   | 7.5 (5; 2-11)          | 2.5 (2; 1-3)            |
| Cancer                                 | 1.9                   | 1.7 - 2.2   | 8.5 (6; 2-13)          | 2.8 (2; 2-4)            |
| Another heart disease                  | 1.9                   | 1.6 - 2.1   | 13.9 (9; 3-20)         | 3.1 (3; 2-4)            |
| Stroke                                 | 1.6                   | 1.4 - 1.8   | 10.2 (6; 2-13)         | 3.4 (3; 2-5)            |
| Kidney problem                         | 1.5                   | 1.3 - 1.7   | 13.5 (9; 3-20)         | 3.2 (3; 2-4)            |
| Heart attack                           | 1.3                   | 1.2 - 1.5   | 12.4 (7; 2-18)         | 4.0 (4; 3-5)            |
| Heart failure                          | 1.2                   | 1.1 - 1.4   | 13.2 (8; 4-19)         | 4.0 (4; 2-5)            |
| Bronchitis                             | 1.0                   | 0.8 - 1.1   | 23.2 (20; 9-32)        | 3.3 (3; 2-5)            |
| Angina                                 | 0.8                   | 0.7 - 0.9   | 15.5 (11; 5-21)        | 4.5 (4; 3-6)            |
| Emphysema                              | 0.5                   | 0.4 - 0.6   | 14.9 (9; 3-18)         | 3.7 (3; 2-5)            |
| Another lung disease                   | 0.5                   | 0.4 - 0.6   | 16.2 (12; 5-24)        | 2.8 (2; 1-4)            |
| Bipolar disorder                       | 0.4                   | 0.3 - 0.5   | 11.3 (8; 4-16)         | 3.1 (3; 2-4)            |
| Another mental disease                 | 0.3                   | 0.2 - 0.4   | 2.8 (2; 1-4)           | 2.5 (2; 1-3)            |
| Schizophrenia                          | 0.2                   | 0.2 - 0.3   | 19.7 (19; 8-26)        | 2.7 (3; 2-3)            |
| Obsessive Compulsive Disorder (OCD)    | 0.2                   | 0.1 - 0.2   | 14.5 (12; 6-21)        | 3.4 (3; 2-4)            |



Multimorbidity frequency by Brazilian states. Brazil, 2013

39x21mm (300 x 300 DPI)

review only

1  
2  
3  
4  
5  
6  
7  
8  
9  
10  
11  
12  
13  
14  
15  
16  
17  
18  
19  
20  
21  
22  
23  
24  
25  
26  
27  
28  
29  
30  
31  
32  
33  
34  
35  
36  
37  
38  
39  
40  
41  
42  
43  
44  
45  
46  
47  
48  
49  
50  
51  
52  
53  
54  
55  
56  
57  
58  
59  
60

Multimorbidity - Two or more diseases

Multimorbidity - Three or more diseases



Percentage of population:



1  
2  
3  
4  
5  
6  
7  
8  
9  
10  
11  
12  
13  
14  
15  
16  
17  
18  
19  
20  
21  
22  
23  
24  
25  
26  
27  
28  
29  
30  
31  
32  
33  
34  
35  
36  
37  
38  
39  
40  
41  
42  
43  
44  
45  
46  
47  
48  
49

Supplementary table 2. Factor analysis. Brazil, 2013.

| Morbidities                            | Factor 1    | Factor 2    |
|----------------------------------------|-------------|-------------|
| High Blood Pressure                    | 0.77        |             |
| Heart attack                           | 0.79        |             |
| Angina                                 | 0.68        |             |
| Heart failure                          | 0.69        |             |
| Stroke                                 | 0.58        |             |
| Hypercholesterolemia                   | 0.57        |             |
| Diabetes                               | 0.62        |             |
| Arthritis/rheumatism                   | 0.30        | 0.37        |
| Spinal column problem                  |             | 0.45        |
| Asthma/wheezy bronchitis               |             | 0.57        |
| COPD                                   |             | 0.63        |
| Work-related muscle-skeletal disorders |             | 0.45        |
| Depression                             |             | 0.46        |
| Bipolar disorder                       |             | 0.46        |
| Kidney problem                         |             | 0.31        |
| Cancer                                 | -           | -           |
| Eigenvalor                             | 4.46        | 1.11        |
| Explained variance %*                  | 0.73 (0.69) | 0.18 (0.47) |
| KMO                                    |             | 0.84        |

\*Before oblique rotation (after oblique rotation)

## STROBE Statement—checklist of items that should be included in reports of observational studies

|                              | Item No | Recommendation                                                                                                                                                                                                                                                                                                                                                                                                                                                         | Page |
|------------------------------|---------|------------------------------------------------------------------------------------------------------------------------------------------------------------------------------------------------------------------------------------------------------------------------------------------------------------------------------------------------------------------------------------------------------------------------------------------------------------------------|------|
| <b>Title and abstract</b>    | 1       | (a) Indicate the study's design with a commonly used term in the title or the abstract                                                                                                                                                                                                                                                                                                                                                                                 | 2    |
|                              |         | (b) Provide in the abstract an informative and balanced summary of what was done and what was found                                                                                                                                                                                                                                                                                                                                                                    | 2    |
| <b>Introduction</b>          |         |                                                                                                                                                                                                                                                                                                                                                                                                                                                                        |      |
| Background/rationale         | 2       | Explain the scientific background and rationale for the investigation being reported                                                                                                                                                                                                                                                                                                                                                                                   | 4    |
| Objectives                   | 3       | State specific objectives, including any prespecified hypotheses                                                                                                                                                                                                                                                                                                                                                                                                       | 4    |
| <b>Methods</b>               |         |                                                                                                                                                                                                                                                                                                                                                                                                                                                                        |      |
| Study design                 | 4       | Present key elements of study design early in the paper                                                                                                                                                                                                                                                                                                                                                                                                                | 5    |
| Setting                      | 5       | Describe the setting, locations, and relevant dates, including periods of recruitment, exposure, follow-up, and data collection                                                                                                                                                                                                                                                                                                                                        | 5    |
| Participants                 | 6       | (a) <i>Cohort study</i> —Give the eligibility criteria, and the sources and methods of selection of participants. Describe methods of follow-up<br><i>Case-control study</i> —Give the eligibility criteria, and the sources and methods of case ascertainment and control selection. Give the rationale for the choice of cases and controls<br><i>Cross-sectional study</i> —Give the eligibility criteria, and the sources and methods of selection of participants | 5    |
|                              |         | (b) <i>Cohort study</i> —For matched studies, give matching criteria and number of exposed and unexposed<br><i>Case-control study</i> —For matched studies, give matching criteria and the number of controls per case                                                                                                                                                                                                                                                 | -    |
| Variables                    | 7       | Clearly define all outcomes, exposures, predictors, potential confounders, and effect modifiers. Give diagnostic criteria, if applicable                                                                                                                                                                                                                                                                                                                               | 5-6  |
| Data sources/<br>measurement | 8*      | For each variable of interest, give sources of data and details of methods of assessment (measurement). Describe comparability of assessment methods if there is more than one group                                                                                                                                                                                                                                                                                   | 6    |
| Bias                         | 9       | Describe any efforts to address potential sources of bias                                                                                                                                                                                                                                                                                                                                                                                                              | 6    |
| Study size                   | 10      | Explain how the study size was arrived at                                                                                                                                                                                                                                                                                                                                                                                                                              | 5    |
| Quantitative variables       | 11      | Explain how quantitative variables were handled in the analyses. If applicable, describe which groupings were chosen and why                                                                                                                                                                                                                                                                                                                                           | 5-6  |
| Statistical methods          | 12      | (a) Describe all statistical methods, including those used to control for confounding                                                                                                                                                                                                                                                                                                                                                                                  | 6-7  |
|                              |         | (b) Describe any methods used to examine subgroups and interactions                                                                                                                                                                                                                                                                                                                                                                                                    | -    |
|                              |         | (c) Explain how missing data were addressed                                                                                                                                                                                                                                                                                                                                                                                                                            | -    |
|                              |         | (d) <i>Cohort study</i> —If applicable, explain how loss to follow-up was addressed<br><i>Case-control study</i> —If applicable, explain how matching of cases and controls was addressed<br><i>Cross-sectional study</i> —If applicable, describe analytical methods taking account of sampling strategy                                                                                                                                                              | 6    |
|                              |         | (e) Describe any sensitivity analyses                                                                                                                                                                                                                                                                                                                                                                                                                                  | -    |



| <b>Results</b>           |     |                                                                                                                                                                                                              |     |
|--------------------------|-----|--------------------------------------------------------------------------------------------------------------------------------------------------------------------------------------------------------------|-----|
| Participants             | 13* | (a) Report numbers of individuals at each stage of study—eg numbers potentially eligible, examined for eligibility, confirmed eligible, included in the study, completing follow-up, and analysed            | 8   |
|                          |     | (b) Give reasons for non-participation at each stage                                                                                                                                                         | -   |
|                          |     | (c) Consider use of a flow diagram                                                                                                                                                                           | -   |
| Descriptive data         | 14* | (a) Give characteristics of study participants (eg demographic, clinical, social) and information on exposures and potential confounders                                                                     | 8   |
|                          |     | (b) Indicate number of participants with missing data for each variable of interest                                                                                                                          | -   |
|                          |     | (c) <i>Cohort study</i> —Summarise follow-up time (eg, average and total amount)                                                                                                                             | -   |
| Outcome data             | 15* | <i>Cohort study</i> —Report numbers of outcome events or summary measures over time                                                                                                                          | -   |
|                          |     | <i>Case-control study</i> —Report numbers in each exposure category, or summary measures of exposure                                                                                                         | -   |
|                          |     | <i>Cross-sectional study</i> —Report numbers of outcome events or summary measures                                                                                                                           | 8   |
| Main results             | 16  | (a) Give unadjusted estimates and, if applicable, confounder-adjusted estimates and their precision (eg, 95% confidence interval). Make clear which confounders were adjusted for and why they were included | 8-9 |
|                          |     | (b) Report category boundaries when continuous variables were categorized                                                                                                                                    | 8-9 |
|                          |     | (c) If relevant, consider translating estimates of relative risk into absolute risk for a meaningful time period                                                                                             | -   |
| Other analyses           | 17  | Report other analyses done—eg analyses of subgroups and interactions, and sensitivity analyses                                                                                                               | -   |
| <b>Discussion</b>        |     |                                                                                                                                                                                                              |     |
| Key results              | 18  | Summarise key results with reference to study objectives                                                                                                                                                     | 11  |
| Limitations              | 19  | Discuss limitations of the study, taking into account sources of potential bias or imprecision. Discuss both direction and magnitude of any potential bias                                                   | 14  |
| Interpretation           | 20  | Give a cautious overall interpretation of results considering objectives, limitations, multiplicity of analyses, results from similar studies, and other relevant evidence                                   | 14  |
| Generalisability         | 21  | Discuss the generalisability (external validity) of the study results                                                                                                                                        | 14  |
| <b>Other information</b> |     |                                                                                                                                                                                                              |     |
| Funding                  | 22  | Give the source of funding and the role of the funders for the present study and, if applicable, for the original study on which the present article is based                                                | 15  |

\*Give information separately for cases and controls in case-control studies and, if applicable, for exposed and unexposed groups in cohort and cross-sectional studies.

**Note:** An Explanation and Elaboration article discusses each checklist item and gives methodological background and published examples of transparent reporting. The STROBE checklist is best used in conjunction with this article (freely available on the Web sites of PLoS Medicine at <http://www.plosmedicine.org/>, Annals of Internal Medicine at <http://www.annals.org/>, and Epidemiology at <http://www.epidem.com/>). Information on the STROBE Initiative is available at [www.strobe-statement.org](http://www.strobe-statement.org).
