# Supplementary material for: Contextual and individual inequalities of multimorbidity in Brazilian adults: a cross-sectional national-based study
Source: PubMed Central journal article supplement — BMJ Open. 2017 Jun 9;7(6):e015885. doi: 10.1136/bmjopen-2017-015885 (PMC5726142; doi:10.1136/bmjopen-2017-015885), 2017-06-09
Supplement: bmjopen-2017-015885supp001.pdf [file bmjopen-2017-015885supp001.pdf]

Supplementary table 1. Individual prevalence, duration and number of comorbidities for each morbidity evaluated. Brazil, 2013.

| Morbidities                            | Individual prevalence |             | Duration of disease    | Number of comorbidities |
|----------------------------------------|-----------------------|-------------|------------------------|-------------------------|
|                                        | %                     | (95%CI)     | Mean (median; Q25-Q75) | Mean (median; Q25-Q75)  |
| High Blood Pressure                    | 22.3                  | 21.7 - 23.0 | 13.1 (9; 3-18)         | 2.3 (2; 1-3)            |
| Spinal column problem                  | 19.0                  | 18.3 - 19.7 | 14.7 (10; 4-21)        | 2.3 (2; 1-3)            |
| Hypercholesterolemia                   | 8.4                   | 8.0 - 8.8   | 6.9 (3; 1-9)           | 2.3 (2; 1-3)            |
| Arthritis/rheumatism                   | 6.7                   | 6.4 - 7.1   | 14.6 (10; 3-20)        | 3.0 (3; 2-4)            |
| Diabetes                               | 6.5                   | 6.2 - 6.9   | 11.3 (6; 2-15)         | 2.9 (3; 2-4)            |
| Asthma/wheezy bronchitis               | 4.4                   | 4.1 - 4.8   | 25.1 (23; 13-35)       | 2.4 (2; 1-3)            |
| Depression                             | 4.2                   | 3.9 - 4.5   | -                      | 2.9 (3; 2-4)            |
| Work-related muscle-skeletal disorders | 2.5                   | 2.2 - 2.8   | 7.5 (5; 2-11)          | 2.5 (2; 1-3)            |
| Cancer                                 | 1.9                   | 1.7 - 2.2   | 8.5 (6; 2-13)          | 2.8 (2; 2-4)            |
| Another heart disease                  | 1.9                   | 1.6 - 2.1   | 13.9 (9; 3-20)         | 3.1 (3; 2-4)            |
| Stroke                                 | 1.6                   | 1.4 - 1.8   | 10.2 (6; 2-13)         | 3.4 (3; 2-5)            |
| Kidney problem                         | 1.5                   | 1.3 - 1.7   | 13.5 (9; 3-20)         | 3.2 (3; 2-4)            |
| Heart attack                           | 1.3                   | 1.2 - 1.5   | 12.4 (7; 2-18)         | 4.0 (4; 3-5)            |
| Heart failure                          | 1.2                   | 1.1 - 1.4   | 13.2 (8; 4-19)         | 4.0 (4; 2-5)            |
| Bronchitis                             | 1.0                   | 0.8 - 1.1   | 23.2 (20; 9-32)        | 3.3 (3; 2-5)            |
| Angina                                 | 0.8                   | 0.7 - 0.9   | 15.5 (11; 5-21)        | 4.5 (4; 3-6)            |
| Emphysema                              | 0.5                   | 0.4 - 0.6   | 14.9 (9; 3-18)         | 3.7 (3; 2-5)            |
| Another lung disease                   | 0.5                   | 0.4 - 0.6   | 16.2 (12; 5-24)        | 2.8 (2; 1-4)            |
| Bipolar disorder                       | 0.4                   | 0.3 - 0.5   | 11.3 (8; 4-16)         | 3.1 (3; 2-4)            |
| Another mental disease                 | 0.3                   | 0.2 - 0.4   | 2.8 (2; 1-4)           | 2.5 (2; 1-3)            |
| Schizophrenia                          | 0.2                   | 0.2 - 0.3   | 19.7 (19; 8-26)        | 2.7 (3; 2-3)            |
| Obsessive Compulsive Disorder (OCD)    | 0.2                   | 0.1 - 0.2   | 14.5 (12; 6-21)        | 3.4 (3; 2-4)            |
