# Supplementary material for: Contextual and individual inequalities of multimorbidity in Brazilian adults: a cross-sectional national-based study
Source: PubMed Central journal article supplement — BMJ Open. 2017 Jun 9;7(6):e015885. doi: 10.1136/bmjopen-2017-015885 (PMC5726142; doi:10.1136/bmjopen-2017-015885), 2017-06-09
Supplement: bmjopen-2017-015885supp003.pdf [file bmjopen-2017-015885supp003.pdf]

Supplementary table 2. Factor analysis. Brazil, 2013.

| Morbidities                            | Factor 1    | Factor 2    |
|----------------------------------------|-------------|-------------|
| High Blood Pressure                    | 0.77        |             |
| Heart attack                           | 0.79        |             |
| Angina                                 | 0.68        |             |
| Heart failure                          | 0.69        |             |
| Stroke                                 | 0.58        |             |
| Hypercholesterolemia                   | 0.57        |             |
| Diabetes                               | 0.62        |             |
| Arthritis/rheumatism                   | 0.30        | 0.37        |
| Spinal column problem                  |             | 0.45        |
| Asthma/wheezy bronchitis               |             | 0.57        |
| COPD                                   |             | 0.63        |
| Work-related muscle-skeletal disorders |             | 0.45        |
| Depression                             |             | 0.46        |
| Bipolar disorder                       |             | 0.46        |
| Kidney problem                         |             | 0.31        |
| Cancer                                 | -           | -           |
| Eigenvalor                             | 4.46        | 1.11        |
| Explained variance %*                  | 0.73 (0.69) | 0.18 (0.47) |
| KMO                                    |             | 0.84        |

\*Before oblique rotation (after oblique rotation)
